# Supplementary material for: Age-dependent aggregation of ribosomal RNA-binding proteins links deterioration in chromatin stability with challenges to proteostasis
Source: eLife. 2022 Oct 4;11:e75978. doi: 10.7554/eLife.75978 (PMC9578700; doi:10.7554/eLife.75978)
Supplement: Figure 2—source data 1. [file elife-75978-fig2-data1.csv]

Time_in_hours	[RNQ-]-RNQ1	[RNQ+]-RNQ1	ASM4	BFR1	BMS1	BRE5	CBC2	CBF5_copy	CBF5	CFT1	CLP1	CPR1	CTH1	CWC2	CYS4	DBP1	DBP9	DED1	DHH1-STOP	DHH1	DUS3	EAP1	EBP2	ECM32	ESF2	FIP1	FIR1	GBP2_copy	GBP2	GIS2_copy	GIS2	GLC7	GLN4	GUS1	HEK2	HPR1	HRB1	HRP1_copy1	HRP1_copy2	HRP1_copy3	HRP1	HSH49	HTS1	IMD3	IMD4	IST3	JSN1	KRR1	KRS1
0	0.79419170198458	0.221884344432619	0.422996567676466	0.253284471844203	0.785930108725264	0.0451295089782293	0.587772301460476	0.34987740483184	0.317282755951229	0.379612546125461	0.198626698498405	0.871457981393705	0.239813684258129	0.520650930400878	0.460987467588591	0.613271317224112	0.316442063404397	0.331707685909795	0.395912408759124	0.0422409535781631	0.824563746438746	0.498325939276306	0.244460048080356	0.291355456808799	0.52684426749462	0.367839702016026	0.283539934096972	0.622527025806257	0.667333251406717	0.391848154246003	0.628420267245473	0.172441300509716	0.237614616892333	0.479292020383802	0.233176969900039	0.174494985894611	0.198944423800493	0.455562781305084	0.460192679347273	0.565921876870287	0.901729501479193	0.617593712212818	0.346626223133559	0.798533849826584	0.466233094375878	0.00212283211642398	0.502229921015551	0.263021380333149	0.124562528385563
0.333333333333333	0.759495175390582	0.280523034818306	0.044918668855395	0.307655602847709	0.99889788741115	0.325599872874622	0.621959715830068	0.0700340588624175	0.292935939616799	0.0550738007380081	0.123178785782815	0.80940886879903	0.348030570252792	0.623613737713338	0.306273922706507	0.635590283709058	0.417320225339666	0.161619598502892	0.561693430656934	0	0.935185185185185	0.510723693331485	0.31013019779592	0.182345340518736	0.52816370216761	0.369055554443011	0.391076939170459	0.41752235839682	0.653930801800896	0.3044040819235	0.684103190214565	0.11196454861661	0.199157410953658	0.459483860803597	0.218126989445468	0.243642279101374	0.176584610979472	0.481402632074341	0.42374925529287	0.58287914455572	1	0.514993954050786	0.226283692614983	0.650972929147336	0.303458724410613	0.000924885361927454	0.587251315330222	0.150613912811014	0.155318166378517
0.666666666666667	0.787535774048763	0.241447468450662	0.0461871362483211	0.327162025461416	0.97336354855487	0.199957624874198	0.606215375530617	0.305023472999774	0.233443003677182	0.245664206642067	0.16767442379348	0.828077259273294	0.349296793741238	0.652704816604795	0.404106988517101	0.650929997608508	0.391720976471888	0.109674492457752	0.360700729927007	0.0239629164047768	0.657852564102564	0.411385692499653	0.316425868183657	0.411238221297784	0.605470579144167	0.332345393635799	0.316334536325122	0.553219759703695	0.771704036375417	0.349251234815612	0.783189762373104	0.0732959111251883	0.127221934350148	0.526197790744881	0.177332886580667	0.180023886497951	0.214356608450722	0.542683072921123	0.470059140644299	0.47616007660695	0.9396485090541	0.701904474002419	0.389192864655823	0.735743885410567	0.344209592786934	0.00271373109765542	0.767028193957884	0.333909373866219	0.163857688623257
1	0.7973007209546	0.38898180528103	0.482987613788987	0.371697236908238	0.953042573742477	0.511308861698183	0.534375186153061	0.421560013054503	0.488987807238243	0.199861623616236	0.209342020125393	0.856623576784006	0.492832270610048	0.539165557656837	0.324964501790344	0.702044481753891	0.47597481497846	0.397414086423954	0.493722627737226	0.133468393642812	0.673165954415955	0.367000554554277	0.409123366577012	0.385490529765844	0.500091114806963	0.323485405479632	0.218892201474973	0.478526152549008	0.735633981670781	0.431448512783201	0.680302516448484	0.0877310293453459	0.1154166760538	0.487835766180097	0.218322443737086	0.221243539320059	0.220147639109404	0.411548268957609	0.418187160845438	0.496369149742649	0.719287954478555	0.556227327690448	0.389554094110898	0.779446871762533	0.397782868967556	0.000859556157791309	0.699975438551133	0.303783408759635	0.140011907624314
1.33333333333333	0.821190748009947	0.211545284070752	0.361662438442023	0.321868697472309	0.749300344255393	0.256634355633243	0.569261888543849	0.29606942317509	0.292510160634798	0.443265682656827	0.207696512639729	0.923251818675396	0.194410527743861	0.702435152109453	0.416480429682677	0.759274352954957	0.5165967082735	0.398434841782919	0.140963503649634	0.0469998653138188	0.792690527065527	0.300298072923887	0.318187227762835	0.567678295673001	0.505629511047959	0.301508515258233	0.369632302944715	0.476222560149357	0.745100229766919	0.301760057605977	0.680508263808813	0.138227548141501	0.15085498006173	0.506795610574855	0.248869157312783	0.17904577559047	0.289154203886103	0.360215973850393	0.444119921662461	0.606156485656146	0.831808257644261	0.508660822249093	0.272696365394218	0.643169226611414	0.438053358953514	0	0.699833240689272	0.207568727045899	0.0648345336371302
1.66666666666667	0.744469292964046	0.23546703157468	0.496866139382181	0.383429084037944	0.796443519825643	0.466179352719953	0.531269829347823	0.33414505560716	0.424656473775886	0	0.174390325531583	0.918037406837169	0.333785556007778	0.807662674231281	0.368746141498951	0.798953600171797	0.58963879377002	0.511171600317568	0.328175182481752	0.109544760707551	0.652733262108262	0.290745875502565	0.248851545950063	0.174970848696858	0.468408535727384	0.234024414316734	0.418118102411214	0.511307175765606	0.724436102825351	0.423220159091506	0.873680164597888	0.233941590854435	0.204857278031856	0.491998569982973	0.218322443737086	0.210916747317917	0.333889915724418	0.484837335067513	0.407355203908482	0.557981885648167	0.910403479756129	0.71246977025393	0.4117856421916	0.606222692671501	0.521454437957283	0.00794300357255322	0.839096655764831	0.333116920315454	0.0838466588045813
2	0.730240995886962	0.1428209416654	0.455081331144606	0.375234605131729	0.866792976199321	0.0928015255045279	0.664266641112438	0.286713696348924	0.450783820398684	0.223939114391145	0.263917088734688	0.826171411648757	0.270022158911048	0.791109243305083	0.305994567230522	0.626434285212282	0.498370705843367	0.36406941136441	0.50014598540146	0.0507991380084405	0.638399216524217	0.291262304173021	0.404101111560707	0.247927893857741	0.517539023664476	0.368080011672183	0.511062294053036	0.580874160619109	0.801154792893238	0.404711988868845	0.705229600488367	0.187345662719152	0.218712686146845	0.529166893893949	0.292930139051767	0.251832670963491	0.28425917435989	0.402404463231393	0.391356715119048	0.710425727167538	0.796542691177997	0.730804111245466	0.417485630504765	0.547734336291158	0.49169314906511	0.00836727638143741	1	0.356982820625434	0
2.33333333333333	0.799321270506545	0.571841265014445	0.199671690792419	0.452102380088943	0.800666220868316	0.471635150166852	0.670293467872896	0.348496640139248	0.418656860847688	0.313699261992621	0.191693255092706	0.866437816347619	0.158549269660381	0.645817281875277	0.298601679219656	0.658368026238085	0.357257262785816	0.36709387168727	0.157313868613139	0.0787352967585524	0.64093660968661	0.321326077914876	0.447075905077	0.196369480949229	0.500903074605727	0.323199322555636	0.457084575553115	0.472153633051281	0.866606711279433	0.235228154921073	0.464446403943114	0.0959046730835781	0.277896681460788	0.519629407451843	0.182721840620986	0.177079257871219	0.228422378472809	0.300830010439307	0.422147630418602	0.521206559470136	0.897000743302337	0.538527811366385	0.220264972429694	0.661603080942299	0.496334343359693	0.00942575629564328	0.964928836433678	0.214137498647419	0.0786418438498266
2.66666666666667	0.714032810471826	0.197202371902083	0.66878077898821	0.437291241196343	0.875287911434728	0.393717887599978	0.548101951013579	0.337525837036294	0.387962066963422	0.144741697416974	0.18952341640822	1	0.331207886763443	0.546613434194859	0.290034263489319	0.703381765116427	0.389346073124931	0.402026388416317	0.149080291970803	0.169373484780462	0.659366096866097	0.379159157077499	0.366791231285554	0.339352683495635	0.51369374814022	0.22100191961642	0.189863486584027	0.471988015297058	0.702883816886565	0.285213340884117	0.584743041895589	0.0482764081718839	0.0357086534345643	0.604279144171166	0.238147093315463	0.221619339826617	0.16825839578799	0.373715195180805	0.333328489709722	0.451677772014523	0.793976074558942	0.679987908101572	0.32861787235851	0.668866267285257	0.209186312911093	0.00550967422748216	0.78418242692969	0.252480793344663	0.123040680566528
3	0.710273212079508	0.131012112918757	0.20205939412028	0.46516392138899	0.771107313569606	0.348906192065257	0.509485712509745	0.329793554757781	0.373601703115928	0.222647601476015	0.0452430888685601	0.928342039941599	0.330665219554108	0.568980411384278	0.483994937646623	0.748893324808558	0.418424831547553	0.508373974518922	0.355620437956205	0.157122654215678	0.67022792022792	0.2989463468737	0.239473496298764	0.129211181494437	0.552349493332472	0.219602974118078	0.245044196872221	0.432266102562558	0.846054302450723	0.278515145946392	0.47908159804653	0.00267469073888325	0.165386261743303	0.619064065974684	0.149941363712515	0.201320964520314	0.203792803357511	0.17592798589838	0.301623744088761	0.394940749311734	0.872480236840266	0.344090084643289	0.322110429969296	0.599117156884825	0.158074052176484	0.00720603142701736	0.658750985689724	0.158411146543439	0.124141754160989
3.33333333333333	0.639948078757643	0.194769651816938	0.49671690792419	0.478028235324057	0.765980632538326	0.420361247947454	0.524792350307039	0.263558690867706	0.32575962841107	0.201429889298893	0.0426158548829737	0.956187795251144	0.254103920770587	0.719618967570218	0.471328250401284	0.675450112985802	0.317767590853861	0.374768439756531	0.263883211678832	0.140988372093023	0.890847578347578	0.326646333009843	0.35497346059553	0.330496990324919	0.496052076148912	0.294379328792244	0.114598043830744	0.472439700081303	0.700111345719148	0.307790683283391	0.469020326030433	0.0283159419779806	0.254105931917003	0.577078523689202	0.207684145864746	0.199426518131088	0.251488375310262	0.217573973610802	0.340616528704121	0.325739137373818	0.916421899253944	0.424531438935913	0.256217927605368	0.707434349804062	0.196326952922918	0.014591167638408	0.726786199051153	0.147701884702782	0.170738921520359
3.66666666666667	0.600785074206716	0.0752115959657389	0.27742128040591	0.590918634168686	0.756569334026797	0.423009693310027	0.540839715415675	0.438003665302639	0.356415715115154	0.265405904059041	0.102372877574243	0.975513758882412	0.258128702573147	0.744507482897901	0.45617051487838	0.697412795947153	0.450817408593836	0.538883218025784	0.207474452554744	0.234690670737182	0.916622150997151	0.294381671981145	0.297657867802823	0.359774353156219	0.579566293518854	0.226343087807432	0.380825356974737	0.539417025505134	0.811604160382523	0.227389841696076	0.502566189604106	0.066406822807604	0.123887624754996	0.56491731956639	0.200396492991568	0.203586063463954	0.237202224399221	0.166453887358171	0.354191591146502	0.462047639947333	0.983823115220333	0.475604594921403	0.310715765540835	0.611413900274762	0.15940433079595	0.0115383119080458	0.535129335418902	0.231132285639723	0.0620293721399756
4	0.724748604225639	0.236936799959455	0.343903894941053	0.562505169265614	0.837642717388612	0.15122623020287	0.458896109109651	0.259031456330179	0.269131023804916	0.0281826568265684	0.0949485709185836	0.989856177764474	0.270655270655271	0.552800541663748	0.446853006544018	0.758132293440967	0.567988512095438	0.83327662470228	0.599357664233576	0.0788755948639673	0.660612535612536	0.303157493414668	0.268262204555733	0.251016356244682	0.580082995208976	0.201748538831466	0.282441550290287	0.457278147490138	0.731902596701336	0.156289965083877	0.587257229419612	0.124510959779925	0.0768017662829208	0.574854726024492	0.228039314234657	0.227915285299508	0.272424559761023	0.177868670100799	0.411496502096482	0.467805131069705	0.908764402806337	0.419543530834341	0.381134260488935	0.581403990811225	0.172300642968	0.0142733300497456	0.560013961244619	0.294509474434621	0.144845563455806
4.33333333333333	0.720691866193328	0.0115554204044394	0.504103865094761	0.608465507478735	0.810188968967481	0.127231315217966	0.467160657537936	0.35137532531653	0.370234178440101	0.363745387453875	0.153991610700819	0.980912864391857	0.253199475421698	0.677149728000747	0.311489072725028	0.780046170440181	0.420744504584116	0.231598049223092	0.278948905109489	0.203808251773368	0.642183048433049	0.388714820463053	0.299240711208436	0.296586933913208	0.578585944330006	0.199577169438333	0.568335163973011	0.352656659339336	0.734606175032491	0.0459160137864303	0.558332768093333	0.10143588660719	0.192623966476671	0.545206110293093	0.294410007259731	0.147303502666639	0.318365127700269	0.243605496893878	0.397864930711964	0.474524199018473	0.73956464930318	0.437243047158404	0.268319114350372	0.68432728255484	0.25902002808366	0.0175772260926309	0.619491448737671	0.16203288204854	0.163878679627658
4.66666666666667	0.63936943840608	0.362323247681314	0.328309207580957	0.35137645614236	0.908153156499987	0.249642459876052	0.491356023071325	0.385643394505394	0.372053415908651	0.27979704797048	0.0790178272607599	0.863207269288149	0.202867091755981	0.574163573112932	0.257210766761329	0.783794468332251	0.36289075444604	0.465691278212544	0.245839416058394	0.181613091496812	0.49537037037037	0.449338000831831	0.317187537190869	0.384450537329425	0.692211875373398	0.259173964165253	0.467702285684397	0.519441265921889	0.749872455154488	0.204699987623716	0.366759366026815	0.0905699554804765	0.129091851217699	0.482757993855774	0.256966549394092	0.144724378642176	0.32165797207758	0.16030325329865	0.374405647019315	0.343235047679846	0.788050832562148	0.54090084643289	0.391099943690702	0.781383721453988	0.212593304264282	0.0176843953488543	0.492780226740954	0.268711769685628	0.154049164748852
5	0.706638725114555	0.336576960113527	0.570213400984927	0.374840150401771	0.836763503975035	0.252555749774882	0.493350288909551	0.445618791789053	0.399690342558545	0.144049815498155	0.13891429973895	0.954627452166728	0.221724777280333	0.578436179402769	0.417707433016422	0.832117251443436	0.275626864022976	0.533061131904276	0.272992700729926	0.258429110173297	0.528534544159544	0.493019548038264	0.368528788708257	0.348239891588667	0.687183260710603	0.16538739919153	0.345781683142424	0.506959709717245	0.683657129663765	0.196407877317272	0.520943272513509	0.0940922181749927	0.0755851938630681	0.548605430429066	0.315156084212877	0.0162109013034618	0.287831918552371	0.190635428610545	0.408417572020647	0.468483421777122	0.727720518321026	0.442503022974607	0.294157644783953	0.752195847033917	0.279639346685389	0.0199966087536729	0.582636348358907	0.169241345070557	0.142278936099566
5.33333333333333	0.663938194954882	0.282651664892808	0.466199074764961	0.346725707632699	0.960200113926245	0.423592351289792	0.448917010051618	0.24515686323735	0.390981227017612	0.0901752767527681	0.0645317833954347	0.929091959934211	0.182833627278072	0.620391772314445	0.325165143844919	0.869048722992001	0.460676018999227	0.472193867906695	0.222832116788321	0.153160635718775	0.654424857549858	0.522546097324276	0.346928331706853	0.264095049005704	0.595180372717228	0.15043384475424	0.184946911449344	0.441725134752627	0.691637526858896	0.0899193291303975	0.488202310701124	0.0861033392575386	0.142474147836078	0.44151775705465	0.258613949852013	0.0245660276342074	0.197783000429501	0.157999760409358	0.312265185163658	0.389618162231178	0.68740007242433	0.366324062877872	0.0729152279464108	0.599319850457186	0.217323183800162	0.0238884676337836	0.484416407047843	0.127702775815209	0.170497524969754
5.66666666666667	0.67600831990992	0.190411028331053	0.503208476346814	0.356046291171212	0.864526834584045	0.395148048095767	0.491229115245256	0.352354413007641	0.274743564931294	0.349769372693727	0.0851034159619801	0.95780545706111	0.305838194727084	0.64822208213677	0.482766390912458	0.963649319400858	0.514221804926543	0.456769120260104	0.120233576642336	0.218247732782616	0.60505698005698	0.463416747539166	0.315069145264561	0.314550439633166	0.494236700121563	0.294004560161808	0.318112872012135	0.423254991116866	0.689114559476861	0.227318584303122	0.51946234371114	0.110404312352261	0.0716200689391038	0.474626286863839	0.190512090244038	0.08201202561621	0.233433228612195	0.165711156367122	0.400197942751598	0.414910425727168	0.290499918469687	0.424062877871826	0.270438681300001	0.680723841268411	0.307013524499298	0.0268444306119438	0.586359346924001	0.20538550160082	0.15645072647958
6	0.632572760114477	0.252242663828493	0.414639606028951	0.388684238988669	0.961203160214974	0.247417765771492	0.511350480566268	0.459769537820401	0.365860267079543	0.285101476014761	0.0450311251924406	0.929131764604732	0.237100348211459	0.709976418948892	0.347112297814545	1	0.132387054015244	0.503648255264451	0.0724087591240873	0.372154754422197	0.485487891737891	0.506037709690836	0.230857115654678	0.292647568623743	0.600644954431063	0.240292491181494	0.33887755635755	0.430075431358969	0.786819497045056	0.294109263836123	0.531465780370345	0.171183140063465	0.220582603014396	0.409293898795998	0.310604791422349	0.0542027881308818	0.304781943566406	0.275986172197217	0.419381921336324	0.596281370945218	0.357765603525498	0.451587061668682	0.273742868374361	0.601515697491103	0.242280688788708	0.0387769198528111	0.702909885336815	0.167742366667303	0.196425231950599
6.33333333333333	0.691906854542327	0.336171506766003	0.341068497239218	0.252355594576884	0.926331822572256	0.292017585677208	0.518400339802179	0.323157515962477	0.2265531256048	0.033210332103321	0.0397264552979764	0.855247927370806	0.380590602812825	0.715789965212113	0.28576367452772	0.847359353418613	0.288882138517619	0	0.310656934306569	0.212905180928437	0.600249287749288	0.301954803826425	0.283055244805179	0.187198638555356	0.545320966324429	0.156172668209607	0.195930749516188	0.306313800475775	0.700895234477699	0.169112545426588	0.703140473445025	0.116202408394775	0.108162299772456	0.444747414153533	0.284832746970459	0.0648641970224246	0.234689560541204	0.212948162853182	0.37049038459986	0.398922714758808	0.231133144295949	0.336593107617896	0.115168449794418	0.572496734381334	0.224491907471731	0.0404806174123616	0.656152642941169	0.124065127588204	0.215533724910979
6.66666666666667	0.666127644933769	0.15356545537479	0.398224145649903	0.253526234420629	0.97336354855487	0.392234758196938	0.573203801018889	0.337283157181232	0.28813624927424	0.237915129151292	0	0.8358885278163	0.370732148509927	0.534075786229601	0.247147796024201	0.838647489177278	0.134430575499834	0.408944841404861	0.329576642335767	0.2059520068241	0.724225427350427	0.145878968529045	0.281912741294361	0.246352147741956	0.465700465262191	0.171335063181414	0.234217270777761	0.47700171640218	0.788506440549206	0.183442782188652	0.697698342716317	0.133672948670573	0.203550589136459	0.44956463252804	0.284162617970626	0.171220888330622	0.262689193775929	0.109275580579467	0.328392837249403	0.413605713601724	0.23066725679084	0.426541717049577	0.359364873622813	0.574005675420026	0.203510457468036	0.043662663478993	0.594038031464509	0.206954495980447	0.303208379608957
7	0.612426692523029	0.284070751609143	0.295105208177884	0.306262286946729	0.919942046214429	0.351501668520578	0.460548500804181	0.412547385333769	0.253028836849235	0.227214022140222	0.0561592181887145	0.787984402937903	0.522859856193189	0.577315495785762	0.31716415606865	0.799285480714324	0.272202584778527	0.257721825261805	0.155970802919708	0.285242884080093	0.794382122507122	0.157188409815611	0.304988931997239	0.148971037786392	0.397541976245562	0.233887094513216	0.367226319368168	0.389423800776898	0.713955081870757	0.26996425879185	0.501168916321871	0.136438555432379	0.0826368080744364	0.457514557694522	0.179510805830122	0.078439346827832	0.221608265731093	0	0.341502911825061	0.463599728683717	0.165953364660739	0.364873035066506	0.298471149453375	0.61997207333003	0.270696918187865	0.0566925365421472	0.480150471192006	0.250447147485472	0.249719483850284
7.33333333333333	0.665899316578828	0.309462267497846	0.245112669750784	0.314704890602434	0.919582930876489	0.162296731818422	0.521832031017309	0.45986995707077	0.351886975033869	0.327214022140222	0.0933197974073497	0.787635714024141	0.438384660606883	0.618547313861455	0.318539325842696	0.687963961677558	0.198911962885231	0.146724131412801	0.182189781021898	0.317146673251324	0.727386039886039	0.144967419936226	0.278068693023588	0.266206548800857	0.350367573278218	0.376018812813082	0.0545530623986614	0.4134948357373	0.862888360089821	0.101733054804436	0.438940514142305	0.160504906532463	0.243877711942686	0.509207249459199	0.202546490199363	0.205660688178243	0.276779093092426	0.0941745246692793	0.318473096092649	0.419419063958825	0.183148848940212	0.402886940749698	0.240897548951903	0.592484572766992	0.108225556130367	0.0639161848332013	0.376914823480745	0.207508258702668	0.21531236522821
7.66666666666667	0.560708756236023	0.299680705488825	0.698253991941501	0.307661965020773	1	0.0955559086816033	0.535848870908841	0.390664357023908	0.18269789045868	0.171909594095941	0.132906802918405	0.765722446809019	0.306109528331751	0.557656837337443	0.26764106679837	0.752075473539847	0.323870540152435	0.286643227099165	0.386802919708029	0.300765466463141	0.89227207977208	0.204398308609455	0.288065598743246	0.0839242381267529	0.369750806769715	0.378710853127887	0.532193106334013	0.467215212743533	0.820184111449989	0.125754297008315	0.430767143729228	0.130355980221366	0.113569288305134	0.541740136821121	0.183699112079075	0.0939346827831889	0.235012893086314	0.269590813410231	0.300220707782573	0.455392411123967	0.277334361109405	0.333177146311971	0.228275766815763	0.70077924417819	0.264222895573128	0.0731195282203811	0.537417428287033	0.176688498921118	0.137946201963995
8	0.602761834759082	0.0942679032993766	0.101925085808088	0.235852117649304	0.717512445203953	0.243339159913131	0.54304376766026	0.237449685771429	0.268434294561641	0.0347785977859781	0.0486121957205648	0.798680714000258	0.504363948808394	0.612150078214377	0.346845289541919	0.717501329962468	0.244117971943002	0.224188121432082	0.506569343065693	0.270534030708449	0.622284544159544	0.206027311798142	0.204186799324019	0.0842393873499103	0.406240556930608	0.23041976947438	0.156336628484754	0.551473245204613	0.716336539643172	0.161581764108026	0.501458319202333	0.10999079108671	0.0741433302543537	0.517914598898402	0.400290389233261	0.132570063628689	0.233225716680259	0.139641983125974	0.291085633650914	0.433651198978574	0.262078662987567	0.386154776299879	0.280898398903562	0.549828836538894	0.259426502106275	0.0897990282831412	0.524386933309203	0.184218398925573	0.213180824144998
8.33333333333333	0.608066559279358	0.175358572804216	0.382405611102819	0.304907144084133	0.798152413502737	0.412415911859738	0.441121243593097	0.25260462430648	0.223379136829882	0.36789667896679	0.207690934648252	0.754277807940873	0.309546420657532	0.544582195139035	0.347721940980368	0.711600689140185	0.174969623329283	0.323428225775963	0.182423357664233	0.280208988057825	0.726985398860399	0.180722306945792	0.243853093090234	0.236330402445558	0.377176086861245	0.217411578920266	0.253151315445369	0.550822066307326	0.762504049781591	0.213595910575722	0.651348662642158	0.130502618968015	0.122738639691802	0.520108099592203	0.387502094153124	0.112678376541812	0.251708756199218	0.179691270343813	0.308391900815505	0.319187647129234	0.261936779065557	0.392291414752116	0.304282693921783	0.427446961848565	0.138578079964526	0.0924716533647109	0.564215261708701	0.206954495980447	0.158158630928527
8.66666666666667	0.588664904680731	0.301961380568648	0.150947619758245	0.322263152202266	0.709203259281274	0.418030616028391	0.348486300429674	0.157767010602599	0.233017224695181	0.178228782287823	0.0802840313260003	0.76333575876459	0.2441550219328	0.708435478975508	0.232067230522286	0.682395201397803	0.163951176405611	0.468073040716797	0.535182481751824	0.197444329711772	0.510149572649572	0.129557742964093	0.282876728631614	0.249314550439633	0.446418726745541	0.165719255383365	0.221455097023903	0.410833659550122	0.716271370744005	0.107186120560008	0.466417961066269	0.0824608327907699	0.168247459841846	0.564299261359849	0.230915284525604	0	0.297531894905662	0.228810774733455	0.275947695323159	0.421573634441208	0.254918819102235	0.397279322853688	0.156316734485726	0.581719291923787	0.0794989283866677	0.103422002435531	0.544630738006903	0.0973603976907459	0.241738131495285
9	0.628960167649313	0.277836906390958	0.220862557827189	0.28439549812634	0.711964732397157	0.381958790190158	0.406490946810081	0.183348814634432	0.158738145926069	0.180627306273063	0.0540061134786587	0.691074359901094	0.264324153213042	0.781816908314071	0.246243363378195	0.725661686831663	0.261322213630841	0.330649124796794	0.106277372262773	0.259573942713478	0.572026353276354	0.114494662415084	0.385725846761717	0.120670637546878	0.505763299878437	0.157276948296233	0.407081960353575	0.421440723900147	0.640007001001739	0.134612716069292	0.386610594858577	0.0843231448732162	0.148804830243089	0.570079923409258	0.305355447590328	0.0311039268578961	0.294729679514712	0.232524429688703	0.227370994121455	0.297462394765191	0.239491589671698	0.321372430471584	0.276064298843003	0.542633214720057	0.104515556869411	0.113669879052888	0.46970539188438	0.185854226737192	0.258012838861601
9.33333333333333	0.668242028056238	0.615224773199534	0.302119086703476	0.314253176314902	0.576739232731506	0.414057947984532	0.477212275353724	0.153925974275936	0.0910779949680664	0.0900369003690036	0.106204957718824	0.727681919285681	0.394021616243838	0.611029394597371	0.36400327200889	0.80144270424075	0.348475643433116	0.361233979811727	0.479357664233577	0.124354628715094	0.694889601139601	0.179408706502149	0.354104681884179	0.109955563959535	0.480527958405514	0.325058861561612	0.27689732726607	0.522919238760577	0.667834120946029	0.179234845615233	0.417140337787425	0.110480564500519	0.211999008718769	0.689395454242485	0.329898922209192	0.0744239441550154	0.261288086080453	0.318672667841802	0.372353565149159	0.43775286278578	0.381574572707039	0.329428657799275	0.318099720578392	0.660814828160893	0.268198950557978	0.129896478902704	0.673940302752175	0.261452385953522	0.258044325368201
9.66666666666667	0.676862205401686	0.248238812021692	0.368825548425608	0.296629956928088	0.62161626668648	0.349276974416018	0.402227879836418	0.304077858392121	0.463479775498355	0.251568265682657	0.162001606461545	0.728955668742348	0.213856102744992	0.671406224463589	0.229554574638845	0.76924541101941	0.321357561029493	0.367169483195342	0.405021897810219	0.212641420490258	0.600872507122507	0.179789962567586	0.36429200485564	0.261101131385711	0.457968393542152	0.325502290093807	0.272713008002511	0.483167213707127	0.703593226903211	0.114656895652924	0.612620678740193	0.0133939831189474	0.107914479464708	0.686759617773415	0.288713910761155	0.0206329921957047	0.260673593382782	0.212828367532045	0.328050554514177	0.417651518174201	0.399807715520619	0.299093107617896	0.14333372289451	0.619251385072744	0.203480895720937	0.149566441635696	0.584303941466189	0.206333899826233	0.287800982379006
10	0.729446538323194	0.329076073184329	0.370765557379495	0.310429510303539	0.540419050449513	0.381588007839398	0.467771887067575	0.519376731186035	0.280201277336946	0.119926199261992	0.215600526562395	0.703023721991444	0.291412291412291	0.763068805304569	0.345558093591802	0.81987183554343	0.484673588865569	0.324675815659144	0.590890510948905	0.280506420041304	0.374955484330484	0.232784555663385	0.243579368290767	0.379628754215121	0.484126416604578	0.256902465748722	0.390867723207281	0.526863952542985	0.617858885127712	0.0944160456647378	0.567288430667662	0	0.0981143127492285	0.662013051935068	0.306276874965098	0.133651133579062	0.292117281239795	0.300371365495525	0.38309187869629	0.355344531779915	0.445496456078455	0.372294437726724	0.282428311889762	0.519514886716814	0.247143596186534	0.170026961142336	0.415708985612162	0.223500544215089	0.324724159119446
10.3333333333333	0.707039081682123	0	0.707655573794955	0.310130488169539	0.408995220051019	0.111075798506277	0.501358431730064	0.305232679771379	0.294793884265531	0.180212177121772	0.158838885294183	0.738282699138786	0.321439876995433	0.579346734841586	0.226466230398815	0.6488508636215	0.241687838285651	0.217042833919322	0.437313868613139	0.190491155607435	0.419070512820513	0.265135865797865	0.355318591864423	0.289275471935962	0.455161134806087	0.106531559237761	0.430566452220305	0.527846366948719	0.724275973530255	0.162181826364485	0.575470844920753	0.114994105122385	0.0195102169554149	0.547163294613805	0.277154185514045	0.153491341144493	0.35512369480625	0.319786764328376	0.345994565454308	0.421920759685593	0.327887390754674	0.296553808948005	0.363694314885841	0.625838926174496	0.220767127337226	0.191904170131928	0.499024005584498	0.256503529441718	0.249685134933993
10.6666666666667	0.636554431290368	0.281688713192438	0.542008655424563	0.35189179216053	0.596948757956262	0.38386567085121	0.550829174296245	0.244043883212412	0.160054190052254	0.19049815498155	0.192502063856846	0.761141725325483	0.304255415366527	0.663841610048797	0.484454870971725	0.707266719702479	0.260521374130123	0.406185021360251	0.145518248175183	0.0757609769237676	0.539351851851852	0.272639678358519	0.400209458976983	0.103053795972393	0.535026146489543	0.151772712838543	0.277524975155604	0.445297208588033	0.789251227968257	0.140084533770379	0.529166384046666	0.10597288942852	0.0912429314889494	0.687001993540686	0.251465907187133	0.13474764738587	0.355244341278306	0.360570225728612	0.366797928866544	0.50841878466265	0.357456423635744	0.169573760580411	0.244547028887732	0.562103058420791	0.279122016111152	0.218677399251724	0.434763499101568	0.205175453671702	0.236977944179194
11	0.642193828878845	0.17951446961634	0.235785703626324	0.309723309093454	0.639423434133294	0.243180253191376	0.526102867857874	0.400379919497234	0.417766595703503	0.316789667896679	0.14945112563868	0.737204788661083	0.109256998145887	0.597978099974317	0.49739319669095	0.682346395435666	0.183944548768364	0.382934482628256	0.495182481751825	0.106536769327467	0.612535612535613	0.317270899764314	0.222942898626616	0.127099681699285	0.527319448513214	0.129177883501312	0.506407238872326	0.565610978951489	0.745615995054611	0.306061753906968	0.401659544642655	0.162824731504455	0.106562732331539	0.663194633800513	0.257776288602223	0.120863620451785	0.425798398136575	0.2139749798915	0.425136146187019	0.435885568367713	0.334526287702476	0.313981257557437	0.34183462065595	0.574298455024548	0.185618210036213	0.231614783778685	0.619775844461394	0.286390803719758	0.242020555918127
11.3333333333333	0.706585552757925	0.261517409153109	0.426279659752275	0.297635180272174	0.578150927508235	0.195137454314317	0.49375173203283	0.452848977815714	0.150261273466228	0.42979704797048	0.178434369352283	0.820367890686822	0.008999231221454	0.717821204267937	0.501719348067663	0.629596911558716	0.238263559041202	0.307436391818834	0.378861313868613	0.143132127143755	0.639957264957265	0.353403576875086	0.323768833456311	0.265607765276859	0.572699235788974	0.176212777035552	0.542026256603379	0.548386732512271	0.739179169785464	0.38211964491316	0.489289832462864	0.179518086423012	0.159686394665105	0.554907200378106	0.189534818785949	0.109280728126352	0.456005057500108	0.266250235312238	0.420902819150396	0.530012368830547	0.345464055720146	0.285535066505442	0.32208918117782	0.763625512364308	0.317049737639494	0.254369165790105	0.682743643109221	0.268317134182436	0.176786239060824
11.6666666666667	0.735739643119654	0.342709441994831	0.0846142366810924	0.372072605119004	0.603400450751665	0.244239631336405	0.49621995975209	0.296872777178052	0.147822721114766	0.249538745387454	0.22479305651621	0.815898622280744	0.385655496766608	0.626088580700894	0.247769786393382	0.725671448024091	0.261736440958798	0.426373294015349	0.380671532846716	0.200115605638861	0.739138176638177	0.261694163316235	0.315438078689929	0.204437301062053	0.592610704490461	0.213855568174991	0.114598043830745	0.571539341744708	0.675611563569468	0.355724406407165	0.542747970788397	0.18623414101955	0.0572239619708471	0.60542436967152	0.291254816552186	0.116467269320264	0.543908077040011	0.367718583677032	0.389131877340076	0.546083868651	0.352471427331079	0.36587061668682	0.362589377729142	0.669958560425206	0.230485551696105	0.289210918638716	0.818865778145481	0.334456771499679	0.307389406030906
12	0.754834774721236	0.512898484618113	0.342635427548127	0.358323949128064	0.627733610718974	0.404894327030033	0.485274807242552	0.0588373124461293	0.10764466808593	0.0769833948339488	0.231860371717352	0.777926558790702	0.178537511870846	0.64936611332913	0.27761760711199	0.7093507342857	0.352811222799073	0.316056103738989	0.263007299270072	0.184699649815929	0.697115384615384	0.266085539997227	0.307583367053055	0.203082159402477	0.606298685870746	0.249106706069821	0.0914273759087821	0.468675660212593	0.715645749312003	0.38554375016408	0.483049582852879	0.216966689542311	0.0980917836303422	0.60426096598862	0.17702574412241	0.134479953874349	0.522313967161639	0.412350897609228	0.380216380812147	0.472050432909069	0.307494224053772	0.341958887545345	0.284882547305122	0.607427593351651	0.168272854925726	0.30827236552644	0.915017386920382	0.224961332085776	0.405384955937973
12.3333333333333	0.665789844079884	0.197202371902083	0.533502462319056	0.485274750443761	0.627585011268792	0.322898458604799	0.598720043925648	0.203432664708491	0.244590671569576	0.344926199261993	0.212582833173431	0.794243289330597	0.317098539320762	0.7523756157923	0.322431781701445	0.674981575749294	0.377167789682979	0.415371819590942	0.441518248175182	0.236458426865404	0.711315883190883	0.351168029945931	0.299871468355033	0.105070751000599	0.661265134861448	0.291856077402596	0.558606621685235	0.53957511517962	0.76000901192777	0.378620531880183	0.422591512356147	0.241478822432209	0.15601414828666	0.695618452067162	0.367928742949685	0.184157692070095	0.43233904554163	0.340359043691065	0.353042037809326	0.320835494553725	0.348490206832875	0.318802902055623	0.278507909862627	0.642977793793072	0.375899785677334	0.331787208835445	0.909510451542847	0.276423074719777	0.391667334562261
12.6666666666667	0.774815069671426	0.276671228016827	0.308013729294135	0.434332830721661	0.55586100998093	0.187033211504846	0.534520223668569	0.345023807730609	0.309347784013934	0.349953874538746	0.222567437916955	0.720886465934367	0.320716320716321	0.664028390651631	0.230437399678972	0.580502994245777	0.174085938362973	0.539261275566141	0.404204379562044	0.16867199425339	0.823717948717949	0.257694440593373	0.320281817532668	0.180927169014528	0.647175786989728	0.280942013852135	0.271039280297087	0.493337649432383	0.743130267043529	0.481163670730838	0.493413823509462	0.189463126220767	0.0986775407213823	0.708603733798695	0.242112023231139	0.0644678047072876	0.327014675436861	0.312054832029846	0.371820766551873	0.421505805370467	0.270426520010927	0.298035066505442	0.416391317743804	0.606380343227782	0.312438105092011	0.368466253795884	0.961878045942836	0.316889126518869	0.463712278210956
13	0.667628982062149	0.372966398053824	0.356513953141322	0.355251019538233	0.615957104292048	0.219926902907992	0.562320807444568	0.396907087088595	0.343564931294755	0.120571955719557	0.196462437805395	0.806183098300022	0.196671641116086	0.718568326679274	0.367292258303494	0.588760963039245	0.265215950513642	0.333522362103512	0.514335766423357	0.240033222591362	0.649038461538461	0.25385761818938	0.343607930878537	0.0674419337556333	0.621908151661173	0.219411298559	0.471991212929547	0.562667499774158	0.768261256530855	0.578174985654762	0.506235727689977	0.149990908397708	0.150832450942844	0.734131961486491	0.219578935611772	0.0872063093301487	0.270616471299813	0.389793438639125	0.324611581749872	0.412472569125804	0.305156315846316	0.275574365175333	0.367906887795757	0.711488221251295	0.299637868598034	0.401964720761695	0.720232170327184	0.254689479144787	0.363089036207574
13.3333333333333	0.737309791533085	0.156555673812782	0.257871959409044	0.360894267045852	0.659187161007504	0.215901265956883	0.561857205386072	0.353944384471837	0.227249854848074	0.34169741697417	0.240322184787702	0.724870117360091	0.333514222403111	0.779388760477224	0.348930423509075	0.558457341148795	0.292472108693251	0.393293259234056	0.632	0.207972299542067	0.561609686609687	0.259188271177041	0.326303763120939	0.34196842204784	0.590490843538576	0.247015439895408	0.372822846383179	0.441378843084706	0.854360544141688	0.198920638016194	0.272800651156481	0.170276912609173	0.252258544168338	0.718462368132434	0.223767241860725	0.110794226056875	0.383642912180629	0.398295483716393	0.332345234116547	0.419163707457207	0.371227634752667	0.350151148730351	0.220031235723468	0.667087068150083	0.296799940876506	0.42880988540964	0.727872073632638	0.207396869649347	0.420911620238381
13.6666666666667	0.621556698934989	0.288277330089707	0.438292792120579	0.265608001068845	0.726638928102633	0.434609883998092	0.598668244812967	0.240997832617846	0.314379717437584	0.220848708487085	0.187671523237912	0.829642378918173	0.189888300999412	0.835866545259275	0.266264353623904	0.507006095864671	0.409035678780514	0.296964197950928	0.609459854014598	0.0550754242614706	0.53053774928775	0.250869957022043	0.352878870825697	0.241877028773124	0.543524043928871	0.240939038589726	0.261467649981693	0.537282814899575	0.749010363716936	0.280502852170913	0.258814352574103	0.133479385524996	0.0707864915403158	0.660679985215078	0.337354107332328	0.102305252970369	0.332828226770326	0.339433196994849	0.279275264744394	0.520999082312572	0.368010893296938	0.28860338573156	0.35246964078918	0.65280843205261	0.407634321188382	0.471888256231415	0.749421513243792	0.264994557849109	0.403198074934069
14	0.637824312278123	0.23642998327505	0.288389792568273	0.326799381596778	0.527986229784283	0.447799141903702	0.522204984628613	0.251659009698826	0.283065608670408	0.289068265682657	0.126001249470091	0.799991083753803	0.5326278659612	0.992482080735915	0.345795777256452	0.483803741465057	0.186761294598476	0.224339344448225	0.337401459854015	0.246834874741852	0.673967236467237	0.294568834049633	0.446599861947492	0.0184362295546944	0.590938344109486	0.36130842886119	0.36178670432554	0.469435996266072	0.744074285097176	0.256897903157453	0.183949444934319	0.208309137940136	0.226304999211481	0.663655147758327	0.195845200201039	0.22824990218891	0.374578340580165	0.525788509917341	0.34971446838809	0.366508398834936	0.189935982821457	0.325755743651753	0.273572878042562	0.782633665150218	0.394087650580149	0.503125892312514	0.749602492340706	0.292813178279771	0.429397710835557
14.3333333333333	0.669586975900411	0.401449495717399	0.212505596179675	0.337933184458484	0.601220992148996	0.377297526352031	0.549984848759541	0.16593444296605	0.233249467776273	0.272370848708487	0.12712800374841	0.815325435025244	0.32392710170488	1	0.313138967773799	0.46422278945596	0.338340881475754	0.455748364901138	0.383416058394161	0.175686899524109	0.504362535612536	0.331162484403161	0.330647656677695	0.12360152532224	0.666748170207073	0.366472225639324	0.380982268947121	0.495449275798729	0.778606353781471	0.163982013133863	0.16456849578331	0.14597593951445	0.0860837632640187	0.635394133294553	0.254788630144636	0.182968515124683	0.397255051467785	0.543205038248935	0.341165472713446	0.406647248932689	0.368438662733447	0.365039298669891	0.341627444939069	0.665003828656367	0.223508979380681	0.533835756508514	0.611075920731155	0.319829797526527	0.49662235656465
14.6666666666667	0.702381808798461	0.145912523440272	0	0.396363381876714	0.615808504841865	0.443190846972827	0.631159238242249	0.324739119155809	0.225198374298432	0.00133763837638425	0.125002788995739	0.786559395733258	0.286799620132953	0.690761364432304	0.270783430053094	0.510036946113337	0.212830001104606	0.633737854901516	0.610394160583942	0.0183958875819342	0.668936965811966	0.348041730209344	0.469842667745698	0.213135419621191	0.638165801268226	0.346463585935019	0.189706574611643	0.407287933993797	0.923164005913612	0.16365197889281	0.248040878156866	0.174620352284925	0.0520647937459168	0.712536280622663	0.102362204724409	0.248208512653666	0.426087949669509	0.488511628702959	0.300228780488592	0.542951761560867	0.274280680280464	0.279640266021766	0.302731532144109	0.746171343633169	0.315542088537432	0.531214513947051	0.746758535103481	0.163700535303965	0.468311216447788
15	0.646094177626949	0.35132532562972	0.50843157737651	0.34647758288321	0.605109344428759	0.310662641029715	0.521067994105261	0.443191993238437	0.31588929746468	0.353828413284134	0.219599946451282	0.682895296202475	0.0308868086645868	0.656253648058649	0.434036609457958	0.500226947723934	0.0701977245112118	0.315110959888095	0.515737226277372	0.141341923318668	0.623709045584046	0.331571468182448	0.319401137743079	0.217673568434654	0.638020478917879	0.33380727737742	0.421256341858884	0.548036676804481	0.864573441625424	0.272705793226047	0.359029143774447	0.201707461565984	0.112803298263005	0.733441190549769	0.365918355950187	0.145213434095917	0.433128877778689	0.561976965071107	0.345637751848246	0.425798986553884	0.297695762753141	0.295677146311971	0.357362175026295	0.702592225575425	0.294117212327249	0.575751414303866	0.775547138591207	0.312605421782607	0.394597487949255
15.3333333333333	0.613996840936459	0.238609295017992	0.126697507834651	0.36069067750781	0.578200460658296	0.33248583081731	0.558013711225127	0.22207717219391	0.282562415328043	0.362453874538745	0.342817778174435	0.716984016036506	0.341202007868675	0.779925754710373	0.494182923817756	0.530935659100116	0.295012702971391	0.410721711844543	0.372554744525547	0.132632216934543	0.724047364672365	0.323790378483294	0.372491847761407	0.292080300022061	0.614415977154404	0.280249693176064	0.323709399027146	0.537467252853142	0.856364022298935	0.15309088317913	0.44943136855909	0.154181843776945	0.017978236871156	0.771742621172735	0.200312726866588	0.184399645820893	0.343486940421555	0.633725805623535	0.33153473443219	0.504440809160914	0.304101715948388	0.399350060459492	0.306025094822732	0.734437637944237	0.412778065183652	0.564511855048443	0.857647013198547	0.338419039253502	0.327325135391978
15.6666666666667	0.655149117182491	0.335867416755359	0.292120579018057	0.328587152227715	0.470973574064443	0.606388050214524	0.512886324257266	0.172294328822836	0.0648345268047222	0.12209409594096	0.238141190120261	0.754686999953827	0.215393659838105	0.620998809273657	0.430752253364613	0.502535469732983	0.129874074892301	0.310990132698197	0.450277372262774	0.193044581125976	0.681801994301995	0.343837515596839	0.178420964939423	0.151807380794807	0.631997674842394	0.355234888384747	0.10675244521157	0.549132012406275	0.833737380508168	0.203454858441563	0.497836261276538	0.142755752638031	0	0.773633152157447	0.184955603953761	0.246453060972345	0.286815270947847	0.715871168688926	0.323870507337283	0.401069305350517	0.372388118174483	0.41023276904474	0.325191504733169	0.652560695464168	0.369248392580001	0.555481010121622	0.768695787065165	0.29247582857543	0.376040485922669
16	0.668661151337911	0.427702599969591	0.627369049395613	0.314469490199072	0.589754067909949	0.344933524021399	0.591157373474193	0.255098369024009	0.00402554673891949	0.107841328413284	0.158007764564136	0.799167923167433	0.337539004205671	0.838504821274311	0.411061550808742	0.463163700077601	0.212139622224677	0.555479944047484	0.422248175182481	0.437943342013109	0.754050925925926	0.333567863579648	0.252897912550877	0.288645173489647	0.567091638428766	0.245012859427433	0	0.458923032912765	0.894275563897175	0.170162654375392	0.485272106536435	0.136186336788142	0.138892017933179	0.727569637587634	0.251130842687217	0.15735230525297	0.246779945660829	0.756428730340732	0.323993212468779	0.553177991461517	0.374150020011986	0.32374546553809	0.290210681767475	0.80565064636728	0.313724041090828	0.565246625085974	0.835347803043034	0.250692203402777	0.304651988229771
16.3333333333333	0.647041896689239	0.476306320004055	0.0546187136248321	0.310200472073241	0.585159868241821	0.391493193495418	0.444141131862411	0.231968468355384	0.174762918521385	0.317389298892989	0.219633414400143	0.688810270241869	0.301496857052413	0.733230604001774	0.558610630942092	0.479513697393273	0.171711035016017	0.261162148879059	0.525664233576642	0.422572281583909	0.81815349002849	0.252977263274643	0.304405779163592	0.230846805962623	0.528874166991528	0.313421008213441	0.511480725979393	0.558583516516607	0.831871688023445	0.138663136300391	0.487227836939565	0.1396411456592	0.00355960078401369	0.80887458871862	0.257524990227285	0.139282993225295	0.347574442894807	0.636766895418685	0.300758350003471	0.449387543390655	0.453789253669393	0.386850060459492	0.472955600650213	0.705655150668889	0.32674599068805	0.548113490774269	0.701630104580064	0.301358309941632	0.317315288702641
16.6666666666667	0.636538792361947	0.117226699102935	0.672810028353977	0.324426291043969	0.647472571018154	0.366809682716245	0.453698068152093	0.23547477384748	0.39961292819818	0.0832103321033211	0.279066913585756	0.690018740038881	0.372767150544928	0.677126380425393	0.628213359674034	0.440122405353038	0.285209322876395	0.444179804166194	0.30207299270073	0.431787061147526	0.878739316239316	0.337304173020934	0.201056815747507	0.274179824146733	0.574210126891786	0.191074784937162	0.15769653224541	0.596622903429793	0.83676494136661	0.155382370920983	0.467496438987995	0.162144327720002	0.0847770743686216	0.661697963437615	0.256463952644217	0.23043778185038	0.368222684432262	0.636369859497202	0.346898708528491	0.482268682919045	0.463267946727881	0.358993349455865	0.36751378515347	0.73616053330931	0.303000517330574	0.538731042602716	0.803676461083031	0.320924592793446	0.316580603548625
17	0.654073158907152	0.285135066646394	0.561110282047455	0.272173763670719	0.623746192139089	0.504475872662747	0.450732568951094	0.276311935664734	0.196167989161989	0.192850553505536	0.230973471072536	0.709204591229917	0.433862433862434	0.889892834629124	0.509493455982221	0.485087338269243	0.105655583784381	0.438962610109259	0.461197080291971	0.449234533536859	0.860799501424502	0.414414945237765	0.138885583033823	0.46954082758186	0.513947485577333	0.190379603431851	0.192269470160573	0.566935920985275	0.711938569933677	0.261810912882212	0.549383888399014	0.176415210543912	0.00531687205713394	0.686220331691238	0.058105768693807	0.230134052673847	0.356600407624213	0.66305170023788	0.298619082908305	0.467713362326936	0.329121992643213	0.394921402660218	0.365133920508271	0.6717490203144	0.275027714137906	0.516771621580952	0.660056620603177	0.363402012641066	0.342627577599927
17.3333333333333	0.699091378258762	0.282854391566571	0.443888971795254	0.286495015237404	0.668697525819154	0.578579373907517	0.518620486031074	0	0.254151345074511	0.282841328413284	0.235865369597715	0.78298812069413	0.277031610364944	0.935677429898905	0.53773305346339	0.44475897175599	0.265602562686402	0.391213942762088	0.506510948905109	0.373456720840442	1	0.403653126299737	0.113072144336277	0.0922756925404178	0.501708114292568	0.220137949185951	0.36016528061091	0.423894877894547	0.796023207575978	0.172982946980749	0.528802369486084	0.138602943332923	0.0966048617838556	0.593148037059255	0.266236667225107	0.201223153429566	0.359056769795271	0.749263258775007	0.34726682392298	0.522615010174361	0.333408157690214	0.280199516324063	0.045222740456637	0.667008242871942	0.263328652723376	0.500764498495593	0.626756466770945	0.242248913161094	0.285898434071072
17.6666666666667	0.729093098540888	0.507272819421215	0.297940605879719	0.316912564655584	0.676573296678802	0.399703374119392	0.499921006353161	0.201524698951456	0.171124443584285	0.33159594095941	0.19604966643611	0.748313476110033	0.446660335549225	0.767668277649366	0.517509877762686	0.433455510925215	0.11142715122059	0.380174662583646	0.63643795620438	0.443336401185238	0.779870014245015	0.329835020102593	0.181907980863066	0.258989631590558	0.563474726597912	0.126251255188829	0.54971494325017	0.530729621488151	0.818796944882007	0.311406058378557	0.38634380157815	0.164423093842932	0.134453781512605	0.666103143007762	0.270229519182442	0.215199843502255	0.375760676006312	0.687667927369808	0.325933890995865	0.519726289749831	0.311731682679785	0.382753929866989	0.394775984615875	0.816089365343903	0.266957357179809	0.509692578382199	0.622038083172822	0.279780659041291	0.222429269856536
18	0.66985909325493	0.133546196340784	0.232651843008506	0.321047977147074	0.62125715134854	0.553207267334075	0.455881400751605	0.38304086226663	0.274279078769112	0.210470479704797	0.206056583145541	0.727021161755036	0.42355175688509	0.718591674254628	0.455783121373009	0.426251750913892	0.0870429691814869	0.561755699217421	0.423649635036496	0.363338421477956	0.475783475783476	0.380670317482324	0.196522504938947	0.210078472156566	0.498863948292924	0.296708043793574	0.417908886448036	0.53840826282032	0.774722287391121	0.244109076316668	0.433952836374324	0.191126009607771	0.104827990177304	0.670011452255004	0.189060144077735	0.248120997467208	0.424048219981951	0.642582102579022	0.360640068714874	0.503251805450266	0.380613150310133	0.295012091898428	0.339810673267958	0.966172694923651	0.258450964451999	0.495262164628126	0.625942060834831	0.305931626216528	0.210196284973876
18.3333333333333	0.669380542045259	0.446201408950383	0.41740038800179	0.30549882617907	0.689080417069123	0.568197468086233	0.406757712240389	0.304253592080268	0.284459067156957	0.341374538745388	0.147989691871751	0.756363572676164	0.406367295256184	0.791739627839649	0.547292875663663	0.432674615531033	0.233541367502485	0.411364409663151	0.751299270072993	0.390455239292449	0.591034544159544	0.411489671426591	0.299228810130198	0.262897481957707	0.539526525942346	0.263834254997153	0.51121920602542	0.541460899153844	0.894471070594675	0.293557956638001	0.525756856361211	0.183884988298228	0.227341338680244	0.704998394260542	0.124225163343944	0.215498424726644	0.297324382973726	0.550267828110828	0.347455725243836	0.365921876870287	0.366340051289979	0.413029020556228	0.443966936880465	0.688820323408855	0.237875988470919	0.519042728969685	0.600139612446191	0.347740711744225	0.330290591831828
18.6666666666667	0.844483367999625	0.19791191526025	0.399865691687807	0.323172942950394	0.610718973673131	0.275809100058266	0.508498939413168	0.0723102285374775	0.374414553899749	0.372370848708487	0.225540507374105	0.726930407106248	0.420340975896532	0.793934299922953	0.352867637979998	0.459498372321163	0.248205014912184	0.327927110506219	0.672175182481752	0.42540630331328	0.696358618233618	0.415364619437127	0.328981505724419	0.393778954334877	0.459834517056922	0.366148951935208	0.471468173021601	0.42306678912343	0.904065794520599	0.121118816077168	0.571715390354745	0.205663774950583	0.117511884110212	0.783000975562463	0.372005361031998	0.194849988674505	0.380564014213763	0.56703403898482	0.369221355213596	0.540142840043092	0.411637022809429	0.299591898428053	0.323571284383201	0.68556596549705	0.185189564703274	0.498835451883573	0.596830280388329	0.189055866384057	0.350925703294061
19	0.736183788686799	0.373422533069789	0.609834353081629	0.298856717500429	0.62051415409763	0.353090735738121	0.446987493104243	0.424338278981414	0.230965744145539	0.0531826568265685	0.306276356009728	0.779178017631877	0.221453443675666	0.680815297331372	0.427091307568836	0.407105171967808	0.210372252292058	0.507466636422063	0.726715328467153	0.440900826075245	0.445112179487179	0.357434493276029	0.377180872587056	0.123223346254451	0.479669864527276	0.341070922817688	0.446153041477065	0.51990424282574	0.924869569103238	0.296880801383144	0.51545592258473	0.291429845090828	0.160722734133868	0.660970836135803	0.275869771597699	0.318848711982373	0.325878989979908	0.552718498108945	0.370514602717919	0.462023700275307	0.452580063826588	0.41810761789601	0.45072405256951	0.684620062159362	0.183903628704456	0.49227904231791	0.631966079346407	0.293160075617255	0.270587404634051
19.3333333333333	0.704033279639679	0.164157924078861	0.66102074317266	0.314055948949923	0.69467766302598	0.665978070872398	0.493264820373627	0.311282939606189	0.184594542287594	0.237130996309963	0.314436957540329	0.762254663913245	0.408402297291186	0.583269127501109	0.553108408445487	0.472915131312441	0.138987076107368	0.578465842501229	0.473927007299269	0.416539463051091	0.542156339031339	0.393095799251352	0.26348987218242	0.228546216633576	0.478182040464201	0.305035917711108	0.513154453684816	0.513031106025475	0.904490323349458	0.25156109946407	0.245409120712655	0.233217195445987	0.217788992272512	0.675628510661504	0.138521248673703	0.262329345386405	0.323488581213575	0.50404394776924	0.346674287301149	0.575394007102103	0.396563444348679	0.401118500604595	0.361309138042774	0.748232061618845	0.116909319340773	0.486880207526658	0.560518117300309	0.331210576231486	0.278456168874539
19.6666666666667	0.681300533287459	0.471440879833765	0.188553947172063	0.253265385325012	0.628860489882854	0.471899994703109	0.5067144599813	0.30517410187533	0.233094639055545	0.22380073800738	0.202151989111761	0.796169835383805	0.160946049834939	0.426513506572342	0.526149833312755	0.402990829359714	0.171324422843256	0.370156137764168	0.430715328467154	0.354965430546826	0.626112891737892	0.434787882989048	0.226537024254397	0.22255838139359	0.430763126875639	0.259834815719684	0.367801663266907	0.4478755758981	0.936132616847836	0.289980085433864	0.410513464016822	0.244352941866535	0.185977876405254	0.7602540098041	0.149410844920981	0.294694520519737	0.327960543777779	0.688660517173515	0.37904583843932	0.580648765111918	0.242246678963273	0.304942563482467	0.311358541482953	0.801146344759245	0.151200945975907	0.481403564919245	0.616789689362307	0.299423322958239	0.303275169168413
20	0.731288804091144	0.173534032740357	0.410983435308163	0.332309023470056	0.623176560913391	0.301869802425975	0.497258531961348	0.355793772332823	0.395355138378169	0.162038745387454	0.182974854414422	0.776816804576582	0.153258264369376	0.557049800378231	0.409050500061736	0.430634526313734	0.073290621893295	0.416241351933764	0.382072992700729	0.425967495734938	0.398993945868946	0.449130042977956	0.36542260728822	0.374176672654502	0.442654185860366	0.266128640047604	0.309011977613892	0.448786473546328	0.922030067068107	0.399168913774804	0.41999366931199	0.239833535694804	0.11893121860004	0.719522762114244	0.0940414363098232	0.284645717933406	0.350219013562272	0.739652251296356	0.335023757973815	0.487938395243985	0.385854384742608	0.363830108827086	0.501274927488499	0.631548128462682	0.131387184982632	0.501869222677895	0.734064144162778	0.367093764122541	0.406078613219753
20.3333333333333	0.711602520995262	0.574172621762708	0.494702283241307	0.393080500575777	0.616378136067563	0.642142062609248	0.471480703535549	0.374070075900217	0.295064834526805	0.279474169741698	0.308044579307883	0.80405593670739	0.23217112106001	0.575471037332773	0.465168539325843	0.416827319625365	0.193278471225008	0.226834524214585	0.498394160583941	0.304171904462602	0.575008903133903	0.446270622487176	0.350224930378692	0.239860073744918	0.477374694073386	0.33075477257838	0.539254145091271	0.461121232196091	0.822371924493451	0.398760121362591	0.366974157227159	0.212013232680498	0.225764300358213	0.760423672841189	0.217819846987212	0.19542141136256	0.434013618573766	0.72584840757791	0.343075474957658	0.616829589434625	0.486420438061315	0.409643288996373	0.33272420131105	0.726892932750777	0.0860616362427018	0.491880460769079	0.658246829634035	0.399953534852044	0.443226966189217
20.6666666666667	0.644057989146584	0.227408646292636	0.301969855245484	0.290337767767959	0.815761448349308	0.48953864081784	0.54759172975367	0.368312705545653	0.211108960712212	0.370802583025831	0.252259086548116	0.842626662442065	0.458734680956903	0.381522728864607	0.603852327447833	0.402551575700488	0.306666298464597	0.25499981097123	0.413489051094891	0.41437887222771	0.278846153846154	0.476417579370581	0.373562944802799	0.153666761211434	0.500621656720928	0.250937636783398	0.226057848213819	0.536040681742901	0.828358153374073	0.271704439335581	0.350353840240566	0.257667740062292	0.119314213621105	0.845418795028873	0.204193890657285	0.260012766921319	0.46911691608314	0.671899440384714	0.334550697401073	0.565642580696645	0.438569555945677	0.374229141475212	0.339146648534365	0.645015990270708	0.09544010050994	0.529101224298647	0.770699484209574	0.360505897254737	0.509956415041772
21	0.587213612123297	0.22193502610106	0.130875988658408	0.221613574332449	0.648723283057186	0.472429683775623	0.490737023674784	0.240353475761304	0.193110121927617	0.215129151291514	0.298974765166559	0.801406537837524	0.190702301813413	0.547477294482968	0.554208852944808	0.379886086884374	0.180299348282337	0.444671278968659	0.644087591240876	0.462299093113047	0.310140669515669	0.475772910023569	0.292611810630043	0.238567961929974	0.514404212964138	0.284071761040655	0.229143783670695	0.469688186937276	0.784220188952568	0.272004470463811	0.421316330914106	0.229372327508842	0.135354946268052	0.905721885925845	0.383146255654213	0.289716450795873	0.444342565201375	0.728613968134444	0.316266018266919	0.684770378645813	0.509867285591158	0.352735792019347	0.264802439361261	0.689000495473176	0.0386372034587241	0.557913605430692	0.467559496878111	0.343246959078845	0.539556593656137
21.3333333333333	0.674819761349952	0.357407125842583	0.560140277570511	0.299575643056642	0.676177031478317	0.406059642989564	0.447448505207106	0.180896911271224	0.333578478807819	0.21609778597786	0.328091880675606	0.866479213204961	0.403473070139737	0.420536527281642	0.669442215088283	0.447999687641842	0.105186126146029	0.23348833692488	0.549722627737226	0.457910568375685	0.28525641025641	0.577855954526549	0.372134815414277	0.384734171630267	0.501029943324283	0.422581669522728	0.408023432187876	0.494677647625643	0.880595680977757	0.350440108161222	0.389703588143526	0.183049147442327	0.0925270912654606	0.979325347051802	0.271486011057128	0.180198916870869	0.337506092646839	0.667889719850085	0.367146669766586	0.711279575469816	0.450343803802066	0.406348246674728	0.255745141995049	0.72354848880681	0.195225777843471	0.584006383177069	0.547836653437956	0.297437415264756	0.472019945270727
21.6666666666667	0.62287662449369	0.38036592164614	0.784435158931502	0.134400905973444	0.613790028976893	0.258753111923301	0.427340089664264	0.233273918610198	0.0915037739500674	0.22260147601476	0.25207501282938	0.841039252181694	0.359878804323249	0.418995587308258	0.526006297073713	0.452772910738776	0.152380426377996	0.388265093947299	0.541138686131387	0.37457349375954	0.392717236467236	0.564366421738528	0.378275771784924	0.288014875043333	0.520350895808488	0.427510878303185	0.285789005701136	0.578551748020115	0.902965371108951	0.373103709509862	0.668086549548939	0.243440848862377	0.0714623651069009	0.868911066271594	0.344446305913888	0.189099726128946	0.374181011532194	0.612410795269796	0.36507359886078	0.510002792961737	0.302953938549438	0.401375453446191	0.415312941576448	0.627764515111932	0.124373660483335	0.612810689913098	0.447677650374239	0.323903454333671	0.429207837659388
22	0.704136496567256	0.283107799908773	0.240784957469034	0.236685562320666	0.556467791069173	0.447004608294931	0.448582905774824	0.171993071071724	0.15111283143023	0.345202952029521	0.266945938106606	0.814233194866153	0.237416904083571	0.56459106721767	0.586209717249043	0.452753388353921	0.195763835192754	0.330611319042758	0.835270072992701	0.355504175271617	0.358173076923077	0.5001663662831	0.17627877085664	0.297311777126469	0.568736318362056	0.575524461520417	0.301323290967101	0.482745641241832	0.893990682709387	0.4650369975885	0.690773022225237	0.199299653346003	0.150246693851804	0.803711984875752	0.381610543362931	0.242834050614666	0.51278611310848	0.568647853096709	0.303864727279773	0.697741690938834	0.417509323044278	0.303929866989117	0.288362036909151	0.606155128147381	0.111433005690636	0.658782630652903	0.583761004175446	0.23160966729681	0.344293500040074
22.3333333333333	0.535864754547018	0.360093254269931	0.501716161766901	0.264481896436547	0.543886370953761	0.290057736108903	0.436560331721518	0.0540422932409478	0.0746274433907489	0.145940959409595	0.284996318525625	0.732397976648988	0.230633563966897	0.382106418248465	0.411678910976664	0.455017984997047	0.27129128465702	0.453290990888813	0.194102189781022	0.319632755679267	0.317040598290598	0.462664633300984	0.245769166686502	0.305285052472346	0.567412270281118	0.432849185664957	0.208588315288456	0.485485862266253	0.913988224910905	0.406215894899096	0.633358203893373	0.243687201956747	0.0774551107306194	0.879260511534057	0.194700396492992	0.272918682947923	0.552461107598958	0.679027261992367	0.290568980465666	0.562586282567929	0.367193472492519	0.406091293833132	0.302885585882303	0.761317057790189	0.0253935407582587	0.631999125029086	0.52688185943095	0.21956373681631	0.26486735593492
22.6666666666667	0.71487731260654	0.374132076427956	0.73809879122519	0.198614318706697	0.627733610718974	0.564118862227872	0.435855863789053	0.246487418304756	0.0407199535513835	0.187869003690037	0.253056739329302	0.708629811787596	0.365893365893366	0.509817655436483	0.482720088899864	0.446696568452802	0.270766596708274	0.455710559147102	0.273518248175182	0.36742951423184	0.458689458689459	0.439283238596978	0.338585675862233	0.445526456777284	0.600958666171494	0.38713599523958	0.391129243161254	0.632102743232256	0.838086939035426	0.328230303894029	0.511539939858464	0.255506284936681	0.0930452609998422	0.995546345276399	0.130395934550734	0.340150937956881	0.492400076570294	0.593590950319169	0.320630123141058	0.611108007820293	0.353460379444196	0.419634220072551	0.414516111896136	0.598891941804423	0.164444608676373	0.567333489438323	0.640187701177657	0.320918227704685	0.378234045882519
23	0.643976666718797	0.626982920277736	0.298015221608715	0.293232556512002	0.668264110756123	0.170930663700407	0.524686162126043	0.297835128327434	0.298432359202632	0.154520295202952	0.246814966866731	0.673523684575053	0.40713607380274	0.508813709696248	0.309914804296826	0.352110613832586	0.209046724842593	0.392650561415448	0.341080291970803	0.269226452365987	0.343126780626781	0.486441147927353	0.310475329064813	0.298257224795941	0.712487803302739	0.306051512091295	0.220356713217218	0.528053389141498	0.832862255290783	0.278076350421356	0.525413190440661	0.231847589552283	0.0542951765156464	0.932698308823084	0.0926174121851788	0.293711261660112	0.454061844990195	0.56117947050468	0.364726472501942	0.472644934764393	0.313400407016266	0.37496977025393	0.491351741869681	0.666287554614657	0.14117951370926	0.571785417787601	0.589668678981863	0.329017803153265	0.418418461397543
23.3333333333333	0.713182052765745	0.173077897724393	0.134233696463214	0.286704966948511	0.753089630235035	0.276497695852534	0.45808545299619	0.367174620708124	0.335513837816915	0.345018450184502	0.207049465628417	0.607543462719742	0	0.370199154817772	0.339386035313002	0.35131019605355	0.29658676681763	0.479376961173491	0.326189781021898	0.28198796803448	0.48766915954416	0.55097046998475	0.312022469235713	0.436292584538779	0.68030236275688	0.345345001702193	0.432658611852085	0.518872895901713	0.806697873259525	0.200398291322725	0.230109204368175	0.179755641192584	0.17056795908712	0.985372622445208	0.301921036466186	0.391465724934621	0.416035685617814	0.548669416254514	0.33236299406979	0.479352032877149	0.391675860885991	0.332043530834341	0.233396725561234	0.617607314985811	0.145502919222526	0.602983415924617	0.677456468063653	0.263451023824527	0.479647312960609
23.6666666666667	0.736715512253101	0.414525366175055	0.315251455006715	0.294797651085705	0.685105381776754	0.238307113724243	0.496235499485894	0.35944233842961	0.0584091348945224	0.445387453874539	0.251210424150472	0.698134116264666	0.243883688328133	0.444771310499405	0.372226509445611	0.357284045819037	0.256241025074561	0.323655060300178	0.472525547445255	0.184733321361228	0.252537393162393	0.453795230833218	0.333099278794659	0.341086004223	0.689552245691654	0.354768573218633	0.387206443851666	0.562283567707549	0.870172381048139	0.222086791504619	0.260326934816523	0.214720183943644	0.0672268907563027	0.989820217774627	0.277852236555537	0.327667154006136	0.470173779178349	0.352254719079972	0.266339560618757	0.464461556876671	0.368925726943333	0.387107013301088	0.425788595773616	0.645072294040808	0.200746434114256	0.577391984767285	0.621663197900643	0.417467076578383	0.57462588305339
24	0.627361869164725	0.111144898890071	0.271004327712281	0.321416983184777	0.720571117220199	0.198792308914666	0.532321351335252	0.425325734943389	0.266886007354364	0.254889298892989	0.279234253330061	0.703888279435156	0.188124632569077	0.416917653101725	0.344349611063095	0.361227567559653	0.101623771125594	0.37049638955049	0.328934306569343	0.195979617491246	0.407451923076923	0.473942880909469	0.317925404041606	0.226781380983896	0.623001529344735	0.366838411782039	0.339034468329934	0.498618597368183	0.826257852852349	0.32704143054842	0.262972258020756	0.194683465601483	0.0923919165521436	0.859894687729121	0.251689283520411	0.365602413359965	0.436278555009161	0.334521588828231	0.282350965737821	0.608989346845949	0.216792279820506	0.299168681983071	0.339460068208621	0.594522769244628	0	0.582931020434828	0.635947619478522	0.402862380415895	0.706855852864509
24.3333333333333	0.584895922931361	0.159799300592976	0.206312490673034	0.326538532501161	0.692126705797855	0.270247364796864	0.501977431126605	0.519200997497887	0.201122508225276	0.269049815498155	0.224698230661104	0.639474769411544	0.148645593090038	0.495762415073195	0.378137733053464	0.357054657796997	0.187921131116757	0.444141998412158	0.410160583941606	0.39346884259675	0.220129985754986	0.479235408290586	0.282210268250303	0.318710409378841	0.677084510713487	0.367796789577427	0.443956273863697	0.538137251949772	0.683828430770147	0.259823206657691	0.45621877048995	0.165091766527653	0.0969202694482617	0.772748480606909	0.256854861227453	0.230417190041801	0.441406834381349	0.409044546745846	0.295637025304704	0.541814627139609	0.350612112651599	0.394256348246675	0.365038300946634	0.56822890860772	0.0680437513857068	0.593394703636635	0.467055340822421	0.365489761754728	0.622552162645935
24.6666666666667	0.756999202414651	0.197506461912726	0.429935830473064	0.329986830301758	0.521633603289001	0.119233010222999	0.446290795038681	0.479945438873965	0.194271337333075	0.329658671586716	0.136264753787456	0.51688116076788	0.410346854791299	0.506035348229086	0.269505494505494	0.294036399486561	0.334447144592952	0.382329590563684	0.0198540145985403	0.372491469875191	0.273103632478633	0.497521835574657	0.305250755718468	0.459361507673883	0.559419541012043	0.293841492895131	0.288665725194833	0.413031858833449	0.744979201811323	0.0840574709626124	0.412256664179611	0.212438485045781	0.16640007209318	0.742972617597693	0.115820628804378	0.302694438152503	0.457866230409024	0.348167987267469	0.343774571298947	0.610713003231856	0.341853427555552	0.286487303506651	0.231436524547667	0.596437097428044	0.283918409578006	0.587272843383877	0.428636063963184	0.238130700732622	0.522717037444135
25	0.642494096304521	0.353910090720186	0.275630502910014	0.314215003276519	0.668747058969215	0.179617564489644	0.541409505655168	0.645461468296806	0.37162763692665	0.238976014760148	0.200116022222718	0.588989709696577	0.306742640075973	0.313744717611076	0.569440671687863	0.330875139707067	0.320087263890423	0.463082681184076	0.245021897810219	0.332085615515848	0.351940883190883	0.445535838070151	0.261490491038488	0.312817118905802	0.49880628069358	0.247049769846288	0.370364558815838	0.513524195248276	0.509382459511494	0.0142552289800066	0.486366411178187	0.275645650401497	0.00184738774866533	0.697012112728969	0.0536103199865975	0.29741778720425	0.496878473613008	0.507637807403351	0.326124406857925	0.554015879982445	0.266460123206068	0.327161426844015	0.304197698755884	0.64273005720463	0.142228955731284	0.561245394841635	0.504285326473364	0.377627986022265	0.549383246125251
25.3333333333333	0.511133353142643	0.275758957984897	0.0228324130726755	0.349595047684487	0.607400252619065	0.259971396790084	0.524579973945047	0.50359417233617	0.371898587187923	0.0754151291512917	0.29123251299672	0.686017574558129	0.279699724144169	0.151035464966963	0.458923941227312	0.310972068347869	0.173561250414227	0.422403689841594	0.266686131386861	0.456827467001886	0.50761217948718	0.550623873561625	0.339811486920715	0.403170401184961	0.471690975482043	0.246211546878978	0.49249437732099	0.476888795206119	0.562690619030063	0.00728700602687523	0.246073842953719	0.243845571803129	0.225674183882668	0.7101973544685	0.130312168425755	0.298375306303153	0.564483930694232	0.567629592867044	0.320271694993792	0.454223357140007	0.326489728239347	0.428642684401451	0.470804160513371	0.70197288410432	0.257963195624861	0.560766069332637	0.536525459880813	0.327588840726384	0.438896140326773
25.6666666666667	0.600256478426099	0.200040545334752	0.38188330099985	0.400696021733183	0.543019540827699	0.323534085491816	0.415568741307461	0.594741378588942	0.226746661505709	0.109409594095942	0.39591467904237	0.568735501148763	0.208067652512097	0.315145572132334	0.629488208420793	0.269535806494121	0	0.556198253374164	0.423299270072992	0.321305109095807	0.410345441595442	0.524920282822681	0.524540023326113	0.235447984620718	0.474931894565175	0.0452955093563419	0.483131962968775	0.511792736908669	0.6656593416824	0.0172405387058909	0.203160822085058	0.205358766357552	0.104152116610719	0.721855628874225	0.234461383816384	0.262859584457303	0.580235534085845	0.602373658720243	0.410355021465325	0.502302198459881	0.349743867755714	0.293243651753325	0.600995505880603	0.73616053330931	0.346530189934225	0.570668214993273	0.454516074821929	0.396510021832254	0.487635344271555
26	0.753305287521699	0.378693426587603	0.438516639307566	0.391750806405436	0.512668103128018	0.383971608665712	0.589528291380369	0.604892091147206	0.374685504161022	0.270571955719558	0.295516410450925	0.553697296625997	0.668249446027224	0.305643108963134	0.323754475861217	0.274509134035814	0.240472771456976	0.33265282976069	0.231240875912408	0.426674598186226	0.174100783475784	0.60388534590323	0.534501225811058	0.23859947685229	0.505890168596993	0.172939988385033	0.329044406088184	0.527439850642898	0.630186978881553	0	0.0053675190485886	0.212200930276209	0.223173451686305	0.696757618173335	0.159825766460044	0.215802153903178	0.438130076200312	0.241777762565673	0.459843938447231	0.390874995012568	0	0.31936215235792	0.673538879976201	0.666996982117923	0.373520065035844	0.588851754823167	0.543712915443981	0.332865499309388	0.455747146177538
26.3333333333333	0.454267081619568	0.312401804267397	0.580808834502313	0.338295828323122	0.567798499145553	0.160972509137136	0.590310457981855	0.42842199516314	0.238552351461196	0.329889298892989	0.332280952274705	0.520333021795445	0.215574548907882	0.226564871238122	0.367255216693419	0.272185970238124	0.214293604330056	0.407470416997467	0.360233576642336	0.363821046960581	0.10608084045584	0.589719950090115	0.42308333134982	0.460527559799565	0.389159414004922	0.193283345110414	0.563680108792301	0.64131334879099	0.580317875270451	0.0478662161199226	0.147455289515929	0.216432924504508	0.0447653592268005	0.712996794580478	0.133160216675043	0.214607829005622	0.469400033137564	0.328477059196002	0.444199034181452	0.254929577464789	0.0695930049108779	0.396795646916566	0.779442856687526	0.814512859781091	0.305579779764984	0.530035652128594	0.528678723321742	0.441546207361862	0.467339905425984
26.6666666666667	0.456519087312137	0.339060361867113	0.463811371437098	0.368287112146025	0.462602471704188	0.28958101594364	0.598694144369307	0.563619779245015	0.206464099090381	0.321448339483395	0.308429460719784	0.426521374311976	0.23438701216479	0.27928369638813	0.166069885171009	0.271854089695597	0.331271401745278	0.336055347623908	0.215591240875912	0.0964128580407654	0.193643162393162	0.560907389435741	0.527455787494347	0.373105165295768	0.477282425914435	0	0.701919556462158	0.653651871480622	0.40543061746601	0.18159759075004	0.193291731669267	0.211083543026741	0.151305562439453	0.798319124053977	0.13969397442341	0.230242159668884	0.488097019066968	0.224162716273339	0.390281430677252	0.437497506284164	0.0495259594635518	0.152418379685611	0.62820989556219	0.626019098238817	0.488330500332569	0.52388663254378	0.38469692464806	0.330526329189661	0.463603506642699
27	0.436463725505528	0.431605088439512	0.677734666467691	0.437590263330343	0.614037694727196	0.224429260024366	0.563338660008754	0.542356002979105	0.241765047416296	0.240083025830259	0.24347374997211	0.418420327767579	0.4004884004884	0.359412575004086	0.341106926781084	0.264508792394079	0.489810007732243	0.44225171071037	0.299036496350365	0.248973017868367	0.257389601139602	0.637851795369472	0.664472901244852	0.344867794900886	0.459829903648975	0.149953225441926	0.599665254458915	0.423635159143606	0.551611906171681	0.0946898240692472	0.124425150919081	0.246649304639063	0.0716651271768761	0.735731641550478	0.186323783995086	0.464504869962729	0.490616117403495	0.27848476032379	0.286794183130951	0.490320392610621	0.139539660791543	0.17493954050786	0.406399073552692	0.506914102968335	0.293222969477496	0.537050834195214	0.242641260648681	0.239998854284023	0.572471442692649
27.3333333333333	0.306153918333516	0.132076427956008	0.287792866736308	0.442145579244046	0.586125764668004	0.296784787329836	0.477012848769901	0.5326822818601	0.120998645248693	0.382841328413285	0.305210959637654	0.584877091138366	0.128476461809796	0.30860825103313	0.2678849240647	0.230730185999522	0.356014580801944	0.429964840648747	0.358306569343065	0.176826120140074	0.450676638176638	0.594568834049632	0.524099683431319	0.416658787936088	0.323951199370731	0.126039553825071	0.173230817511376	0.40710349604023	0.421367206265152	0.12565678689164	0.366933459947094	0.229451512432033	0.0802937797102754	0.739343040482813	0.118556988887027	0.276769351152112	0.346930995043843	0.0429209522016671	0.321789363725457	0.512229182460201	0.216328509985875	0.171342200725514	0.428460631301595	0.493671456240709	0.324255413494938	0.560233893231527	0.22478896544592	0.401570267397379	0.449322944694428
27.6666666666667	0.234884193735045	0.182504688054331	0.507983883002536	0.453215760375114	0.608886247120886	0.273690343768208	0.389042415703419	0.591670223181784	0.386684730017418	0.47260147601476	0.2522869765055	0.598311963532553	0.339302672636006	0.233032149611263	0.412490739597481	0.216605740557266	0.410416436540373	0.550413973006691	0.455766423357664	0.129147211996049	0.391203703703704	0.486801608207403	0.42591578797039	0.460433015032618	0.411559816294095	0.114230050722502	0.483341178931952	0.514634587009545	0.598068021434982	0.0776630575422201	0.33728775237966	0.284754849343352	0.121251717845315	0.636812031533087	0.180739375663148	0.2898348536952	0.412681713694661	0.232185580066058	0.190286597209104	0.576638870047481	0.262423843275443	0.200831318016929	0.52198718697874	0.512949867123102	0.266765205823664	0.577921958760389	0.191734426102357	0.382255405551631	0.565954689962865
28	0.0803340475110645	0.338604226851148	0.624608267422772	0.404583309475184	0.55811476830869	0.113194554796334	0.232754132921703	0.44373593084461	0.402632088252371	0.307011070110701	0.164232803052277	0.591268129037189	0.269569936236603	0.398893324928206	0.349516915668601	0.242463139297097	0.336904893405501	0.58791728101017	0.20356204379562	0.073432028373889	0.265268874643875	0.488531124358797	0.528764906100493	0.492389146260754	0.298039993633497	0.238000966960283	0.595010199278205	0.502058929808184	0.757422737615116	0.146782728708104	0.319636437631418	0.164692909136767	0.124856376867101	0.668660207352469	0.05869213156866	0.304285155365196	0.240051089759366	0.199235021306454	0.173398496216323	0.665339344850975	0.224426481892859	0.0732466747279324	0.398202352241217	0.65022971938201	0.227167245584214	0.600165451714745	0.186020657471205	0.284115284487642	0.473059954125114
28.3333333333333	0.274034687143237	0.533424560336527	0.31241605730488	0.386667430127434	0.67932238650717	0.170612850256899	0.166254432061579	0.483200696240136	0.0845364815173214	0.462269372693727	0.137636939690756	0.48935065844886	0.323339212228101	0.30410216898975	0.675615816767503	0.236103722430732	0.304512316359218	0.502022607840914	0.0254598540145981	0.0306074346772025	0.501290954415955	0.434330375710523	0.497691190821888	0.379943903438278	0.284435053596267	0.327407602367622	0.439876562581726	0.367468156222711	0.767227863986921	0.209136697932411	0.276083565081734	0.122531336700159	0.130240836280893	0.770027812619295	0.202574412241023	0.294102506023104	0.293902849026222	0.152870809302963	0.174383366350701	0.64953916131349	0.254817170919302	0.188558041112455	0.056973322142303	0.466769514886716	0.0565664030744217	0.640774525427374	0.115955892808666	0.202457560770685	0.481070884713587
28.6666666666667	0.424678229047746	0.238153160002027	0.118415161916131	0.429357611385745	0.649317680857914	0.238730864982254	0.208574307122119	0.469526941648048	0.13179794851945	0.418311808118082	0.234850175148932	0.732702084331767	0.188576855243522	0.15981415330018	0.47436720582788	0.24761216830248	0.472522920578814	0.635287890816983	0.177343065693431	0.121391532728742	0.420762108262108	0.437193262165535	0.630578630423916	0.427815070435852	0.274232501920331	0.379371704682319	0.554683822375648	0.375564605980306	0.730548945567211	0.230551419709795	0.308157543693052	0.110433640101591	0.0973483227070989	0.907418516296741	0.230496453900709	0.286483536849042	0.310378331250171	0.269626752006572	0.118027805628613	0.642736304512628	0.300099318745407	0.162998790810157	0.316697300341043	0.588678437908202	0.0902889660778951	0.681799797552871	0	0.251341442456415	0.330996652888935
29	0.243025819870822	0.305661142364807	0.0950604387404866	0.500104975855553	0.601840156524754	0.163938767943217	0.155835040545755	0.483903630992728	0.484226824075866	0.397647601476015	0.223147549030545	0.709341519296508	0.319450097227875	0.323994303191614	0.486067724410421	0.240813497776888	0.135921793880482	0.766965332123549	0.264175182481751	0.365594415013019	0.444622507122507	0.438919312352696	0.787791873943779	0.482619520342882	0.362987550718654	0.296321831846179	0.429677284376798	0.378752747749104	0.710709670692242	0.276418678437888	0.396803002554885	0.153706734237801	0.185234415482011	0.889004017378343	0.256910705310772	0.317350657908284	0.312643267685566	0.404042236407509	0.164116498835109	0.695247975102741	0.213448478136111	0.0973397823458285	0.188614897527703	0.41033061573803	0.0719902446234571	0.703121341289305	0.0370490065540285	0.0400777813846615	0.484265333928714
29.3333333333333	0.291149930406768	0.165881100805838	0.223921802716012	0.518186271702963	0.517720484434207	0.55304836061232	0.202785756279995	0.385635026234529	0.344455196438939	0.256365313653137	0.277460452040429	0.77367860435272	0.311400533622756	0.443650626882398	0.442685825410544	0.29570068279541	0.264056113995361	0.276284450493365	0.203445255474452	0.340744814582024	0.427795584045584	0.476902814362956	0.768416918572823	0.414736377674829	0.287136203949539	0.337632206071252	0.347455410847848	0.285886356108284	0.446004774087356	0.215351092675865	0.411610029618576	0.184794148527454	0.166670421519814	0.89474832306266	0.0514324007371419	0.474738998826267	0.281358833171667	0.440771481868122	0.144934134791587	0.693368710848662	0.207410999603996	0.0192563482466747	0.112337048330377	0.326111436421782	0.221535732761806	0.726084923561161	0.0272890623990074	0.0209952452786954	0.483541144276898
29.6666666666667	0.167339661886368	0.341746490294461	0.733472616027458	0.619465704706099	0.545186616142854	0.345145399650405	0.0193858179209391	0.407426003564883	0.435300948325915	0.442527675276753	0.278827059952252	0.719314977542205	0.341066341066341	0.32294366230067	0.391946536609458	0.278472178161284	0.255025958245885	0.402404445956675	0.0690802919708025	0.423638547185059	0.313701923076923	0.608127686122279	0.674362697260372	0.452365194919795	0.212931843817687	0.355274939994107	0.311208745227261	0.271552892288235	0.545925454227227	0.310329696706033	0.206665310090665	0.241074099491457	0.168765629576227	0.874794738022093	0.31138660858882	0.211302843728765	0.337403140990684	0.414060547978026	0.106953667511072	0.473602521645454	0.238280282158415	0.0514963724304715	0.439552500451537	0.297261384622314	0.0466262656122975	0.691170501148399	0.0565688948640718	0	0.565352629791197
30	0	0.269373067761391	0.552007163109982	0.623702911966611	0.620588453822721	0.326076593039885	0.108190216701588	0.417308931455494	0.412734662279853	0.643680811808118	0.285978045025547	0.738379822534857	0.636141636141636	0.36611332913077	0.316508210890234	0.283035535621032	0.22393129349387	0.414010812445654	0.295357664233576	0.415652779024872	0.44275284900285	0.694194509912658	0.722871492157189	0.658693391320791	0.286700236898498	0.447422249813331	0.44191641822271	0.17957481405643	0.632438098855634	0.418993470572572	0.425067263560108	0.200851091285552	0.176695879424155	0.877588118739888	0.195175071201206	0.430039330354385	0.355007874193076	0.472277651327161	0.0540742140009785	0.581163468060488	0.271210058087701	0	0.14731787129607	0.235079500923381	0.0503658266203532	0.712431119896706	0.0937600992799619	0.0381173340462232	0.509642504112329
30.3333333333333	0.00724707943011747	0.419593533019108	0.329876137889867	0.56721317733285	0.585791415905094	0.285608347899783	0	0.310094645143474	0.132146313141087	0.27559963099631	0.19812467926549	0.640676870461272	0.16397594175372	0.117695127361023	0.37199345598222	0.265484911636806	0.260631834750911	0.434047862084609	0.231357664233577	0.440799811439346	0.471866096866097	0.713642035214197	0.650822364506224	0.52097318080111	0.242598363624201	0.488666824965885	0.634708928291229	0.13626577132705	0.588949961457251	0.352090279366484	0.624746207239594	0.228175755336184	0.229323901142226	0.8568104560906	0.253839280728207	0.368866215019665	0.295294305003933	0.374468194342238	0	0.527694210589315	0.248733103636676	0.0980652962515115	0.0105287761758551	0.2222535020945	0.085625600472988	0.737054357568021	0.0562069366702433	0.0301864334498145	0.452511669090173
30.6666666666667	0.00330294168243605	0.17181085601338	0.184524697806297	0.607339402846436	0.563328132352577	0.206684676095132	0.0300693849114365	0.501694574849999	0.434952583704277	0.584824723247232	0.217190254133292	0.791023887578873	0.363225252114141	0.214307394177115	0.342514507963946	0.279999804776151	0.266127250635149	0.536161203735208	0.0694890510948904	0.573432028373889	0.450008903133903	0.673634410092888	0.854580725013686	0.43481138318994	0.245389475432449	0.372105198412812	0.534860609864533	0.184874582191574	0.652368610189437	0.499199291926538	0.632089805331343	0.289934129875005	0.271295649627143	0.868238473517418	0.0869492377282624	0.302210530650907	0.15122472255333	0.400340560984375	0.00625150354149625	0.495694848980569	0.196655351247414	0.062016324062878	0	0.0872708436556912	0.020227625452664	0.691936834733996	0.0701681812893468	0.141527748604454	0.475439570714877
31	0.164818666624963	0.547919517510516	0.438367407849574	0.568638304099148	0.597506005894445	0.11234705228031	0.0777012589774337	0.553477434957615	0.633752661118638	0.52559963099631	0.243166960440884	0.599770406660436	0.19006919006919	0.199061427470757	0.280693604148661	0.232311499172739	0.204959681873412	0.484631960984462	0.311708029197081	0.669985184520068	0.579816595441596	0.586780812422016	0.890748101778021	0.727049257823579	0.248618860995712	0.37620476671368	0.556357550081072	0.220177512120208	0.5741975846544	0.562940905118906	0.685921002057474	0.242232545589986	0.379953590015095	0.961098689353038	0.272100295973642	0.272321520499145	0.201521432443606	0.325988739239813	0.0607277383022454	0.444017076966046	0.214259545929096	0.137651148730351	0.0983234703526235	0.315965497049682	0.211336930012564	0.722229766481127	0.0410693279211964	0.0604619781422852	0.499840659193869
31.3333333333333	0.133024725145833	0.209974152349095	0.669377704820175	0.646803962361384	0.596688708918444	0.384342391016473	0.127656323247183	0.474798952292488	0.43460421908264	0.45779520295203	0.289581427519579	0.572276524638295	0.444353999909555	0.217902920781677	0.316869366588468	0.283440625106763	0.211255937258368	0.419606064042947	0.29629197080292	0.648339992816737	0.34940349002849	0.545882434493276	0.805310261109656	0.835208471211119	0.239313617165568	0.484095219840423	0.607563157068884	0.130966003191906	0.467894076333263	0.616301441274532	0.863838205702141	0.188105251426795	0.315745601189538	0.961038095411221	0.233344502149997	0.271698618289644	0.350860852793609	0.491679359266168	0.00855222475705195	0.606495631009855	0.14960706624285	0.0469316807738816	0.135949767856953	0.147943786315931	0.0578301677629147	0.693252227248738	0.132166449060848	0.0516304174861719	0.430204910368411
31.6666666666667	0.182934801307414	0.0239724291723683	0.353454708252499	0.722068469706513	0.563501498377789	0.428836273107686	0.227372205114126	0.517895547243073	0.446061544416489	0.463422509225092	0.257201186996586	0.564974755877956	0.409894632116855	0.239896336765427	0.517943573280652	0.206249115391936	0.101485695349608	0.295716608067748	0.254773722627736	0.671287150938314	0.513666310541311	0.560796478580341	0.723716468712065	0.664271532570672	0.261125809941433	0.456945950353169	0.542549296511324	0.176608750639887	0.371574443364503	0.76884101725554	0.748816387438106	0.285250488307026	0.465902178565796	0.892548762974678	0.172139386831965	0.17444865432531	0.334896911611177	0.738462854893639	0.0390428353926807	0.576172046442964	0.210858567141801	0.0363361547762998	0.176965247601543	0.180340975631728	0.115638164215505	0.680171705701478	0.106803521336143	0.145455008370092	0.521611193166856
32	0.247833226467323	0.309056814150322	0.142963736755708	0.83782820860293	0.619350125071204	0.365803273478468	0.291991598183923	0.651034736692357	0.632436616992453	0.514852398523985	0.192429549967648	0.53473753596352	0.379595712929047	0.196002895099344	0.49224441289048	0.288526206361369	0.179747045178394	0.422101243809308	0.320700729927008	0.805468258956631	0.594818376068377	0.629242340219049	0.737533620546021	0.674072673410861	0.260918206583794	0.549553853680027	0.661854699513573	0.215664428317625	0.388516495179363	0.684884806798706	0.85980013113568	0.341196102928669	0.395183274382139	0.97394460501839	0.378259898363768	0.234355373432449	0.295138268900074	0.65318741122311	0.066795184146497	0.544188644615568	0.258864039202316	0.106559854897219	0.273525068261742	0.0672154407459122	0.138193777252235	0.693863679238012	0.0861719042879119	0.237172754874067	0.468584099504994
32.3333333333333	0.240182662683953	0.440981197101009	0.242501119235935	0.848319431985189	0.658790895807019	0.30128714444621	0.208346391026322	0.647503326387669	0.652061157344688	0.644880073800738	0.190170463419532	0.590707679276256	0.307647085424863	0.224556979757652	0.59390665514261	0.253927659802921	0.0105213741301226	0.209443877358134	0.248875912408759	0.548212040944599	0.519809472934473	0.707212671565229	1	0.632472975954114	0.145543793928294	0.593476165001187	0.336733092734976	0.165278990635069	0.286138016556624	0.797126451869382	0.811967261299148	0.384425205440884	0.482393493590466	0.92080371804427	0.477578600547272	0.322189732924243	0.322121254530275	0.645094381599439	0.0499377594365896	0.618768702868771	0.0468280472748759	0.117835550181378	0.115683732987686	0.174012431872438	0.0395018845613778	0.69761974145784	0.148170172059413	0.118960326401752	0.45896354053363
32.6666666666667	0.350033623696105	0.202169175409255	0.270258170422325	0.862462542706087	0.596267677142928	0.443243815880078	0.317456041978001	0.777094368990536	0.525875749951616	0.611254612546126	0.305841272674535	0.457048372227804	0.370777370777371	0.185706614368098	0.355431226077294	0.213809158926854	0.110681542030266	0.380968583418397	0.500321167883212	0.828566939032055	0.551326566951567	0.757902398447248	0.836288767762359	0.510699316126185	0.152503119817124	0.613330319926534	0.319420471781998	0.161379445331085	0.347428435238872	0.532521499105532	0.694467430871148	0.379418958630277	0.37393831527249	0.989250634721541	0.313564527838276	0.315085558964644	0.341218786746904	0.514555131518149	0.0835944853730641	0.404592427083749	0.141053795183147	0.203295042321645	0.0852235904082958	0.291822440430611	0.122666469588352	0.648920856972351	0.148454567783135	0.177547785903874	0.58664514134579
33	0.346333453231785	0.66600780497694	0.3896433368154	0.872126683590047	0.504272234192733	0.216219079400392	0.32819140808118	0.83722039514975	0.651403135281596	0.877629151291513	0.243635511724938	0.529801756818938	0.519468186134853	0.229740141486307	0.352032658352883	0.252131600396304	0.0634043963327072	0.376394087180069	0.342598540145985	0.815406976744186	0.614271723646723	0.905878275336198	0.91438364315807	0.56805647474079	0.138932780339501	0.625305751125021	0.540980176787489	0.123746574723719	0.218766408597826	0.704431834802861	0.714124217142599	0.438787121598714	0.350417915155338	1	0.241581504439605	0.31422585095649	0.196787264880134	0.532815361182893	0.0348805481690296	0.546977616406655	0.211472691580354	0.211865175332527	0.149113394175706	0.212006215936219	0.221942206784421	0.63808061330176	0.112762904455964	0.136588439725792	0.554526042203369
33.3333333333333	0.199436998576857	0.22685114793979	0.482763766602	0.949509794565431	0.580082720360601	0.0712431802531906	0.301494145405289	0.694340538414548	0.564931294755177	0.439437269372694	0.0791572770476805	0.529325692959509	0.79048523492968	0.306016670168803	0.3450904432646	0.228670574397368	0.032944880150226	0.204680352349628	0.503766423357664	0.724858579509742	0.516203703703703	0.851050187162068	0.809130507223954	0.638397781349469	0.186333240296273	0.388440533373003	0.786233589622889	0.0738165858652774	0.244806038736394	0.439155562389598	0.750469149200751	0.487588496483603	0.389348232590624	0.885065411160192	0.377980677947171	0.353015670366329	0.201320354990179	0.581195557304948	0.0392963183616928	0.588820173163628	0.227710988803876	0.0260429262394198	0.0789073871423562	0.299975226341155	0.300613406252309	0.628773036802363	0.201546078570782	0.115914631429535	0.600118503761206
33.6666666666667	0.252199615282361	0.630429273731692	0.456125951350545	0.763957017158781	0.628513757832429	0.366544838179988	0.242331788856457	0.757387091105365	0.494600348364622	0.564252767527675	0.181111805261162	0.529147368035576	0.699407588296477	0.332212649716327	0.519849672799112	0.231940573860503	0.229343863912515	0.393898151298627	0.590189781021898	0.554497396067164	0.770788817663818	0.904973658671842	0.849582272153857	0.635466893574107	0.117614222214021	0.358753708349902	0.605314085464721	0.0621179499533258	0.233148253659699	0.376149025461392	0.768233511949174	0.533298726589124	0.408655687476063	0.889034314349251	0.369631987490925	0.335564112596009	0.172608103260511	0.67670665548577	0.117540214185036	0.451677772014523	0.210714565549313	0.141278718258767	0.227218639439882	0.377741993603892	0.33801640676964	0.652478729471766	0.295939604689944	0.214287078233306	0.582319086166165
34	0.295860375647061	0.403578125791902	0.523653186091628	0.793350256713683	0.6293062882334	0.532761269135017	0.235587544385365	0.932484790667705	0.451248306560867	0.491143911439114	0.218328164394565	0.57752437239976	0.410979966535522	0.350073544862366	0.312885850104951	0.274684835499505	0.28603777753231	0.238176250425315	0.268846715328467	0.592332989135315	0.61102207977208	1	0.799466831694951	0.658850965932369	0.139006594866661	0.302712924368257	0.434070819603536	0.173277575356078	0.239218271124964	0.471862705755722	0.670019670352032	0.616061635197992	0.485862977898934	0.839007955984561	0.40126766069135	0.356294915882462	0.0953509284148179	0.621119915116458	0.068742320838399	0.38429557515062	0.18192695307454	0.0791868198307135	0.284106966416285	0.180318454123688	0.218136131845392	0.637762775713098	0.207647659552464	0.195984265500583	0.589185052878248
34.3333333333333	0.480456031152745	0.56570878313314	0.369720937173556	0.759948848128567	0.746687470589692	0.300863393188198	0.398099490555727	0.644356856542733	0.619392297271145	0.543865313653136	0.0263838996854014	0.611641751596565	0.464523131189798	0.270481660479559	0.385075317940486	0.259515942467532	0.301585109908318	0.243771502022608	0.358656934306569	0.710435934273144	0.670806623931624	0.90277623734923	0.889010544355318	0.481232863760991	0.081133698869023	0.368377537913139	0.649354045713688	0.254324881809148	0.144779226389308	0.352592831506269	0.545404598792648	0.466038466276021	0.497690765314169	0.79733750219653	0.325515161668621	0.252888001153141	0.110978668095121	0.547883901220201	0.206163995408245	0.342441048557635	0.110701224225303	0.179927448609432	0.447021450654994	0.518681590919328	0.393570320005912	0.628901493102631	0.429825355171478	0.271983425308866	0.672988775537465
34.6666666666667	0.690486839841734	0.479600628452689	0.393896433368155	0.67794679950884	0.664326225326299	0.51083214153292	0.467999803163372	0.71065866659972	0.372479194890652	0.573477859778598	0.0544411968138512	0.600135017442407	0.329534662867996	0.196026242674699	0.261884183232498	0.272347029913174	0.51817077211974	0.26516955880685	0.510948905109489	0.863860330430098	0.964654558404558	0.874802440038819	0.761561897507914	0.51860956162743	0.104276859837746	0.31891952201265	0.50703488676186	0.396059803065434	0.129162896180358	0.451876882226531	0.425883470121413	0.437259145858629	0.490436389032825	0.796325583368175	0.374853409281287	0.127602289809114	0.0998261082182766	0.751635206133521	0.232677991058671	0.449008498583569	0.131975341844957	0.103944981862153	0.71853850812235	0.471848114949777	0.580917892247432	0.585822388244854	0.396370076399033	0.371180151107207	0.566188453420961
35	0.667794754703408	0.539810450560033	0.930532756305028	0.799629721527685	0.41857988458776	0.195773081201335	0.617639669832456	0.512648641411225	0.620398683955874	0.756411439114392	0.0362011646846204	0.50177767658546	0.42929498485054	0.27912026336065	0.288682244721571	0.28111258071286	0.342538385065724	0.244792257381573	0.432700729927007	0.660108197898895	0.560274216524216	0.832469152918342	0.80204936567253	0.735778891305033	0.0711871913341745	0.314064694792432	0.764579737433967	0.392340931675148	0.227409666595912	0.374967652893988	0.497176060955482	0.453873315853995	0.52772208078942	0.63326122654257	0.55070642765399	0.180662232563886	0.0870649287140211	0.671327845566717	0.313471247442971	0.549267845030523	0.146396677798555	0.264404474002418	0.895482506932418	0.41548804107923	0.47267016480674	0.584046755157153	0.432294427136523	0.351193772397156	0.550108389913632
35.3333333333333	0.701668673662481	0.450306624094066	0.60326816893001	0.708001705062381	0.456101245758724	0.612585412362942	0.612164503622053	0.47033029565101	0.826630539965164	0.728736162361624	0.0869441531493339	0.547204358770641	0.661782661782662	0.397422427680885	0.216392455858748	0.258403166530823	0.540097205346294	0.273713659218933	0.561693430656934	0.70613158839903	0.549100783475783	0.819797587688895	0.794861114416966	0.465002678768397	0.102749821807118	0.286177331361268	0.501072231811287	0.330983317775302	0.288392860467801	0.270939359958596	0.480600963168961	0.510056485245209	0.469912361727533	0.655008392260942	0.587340146311498	0.24525873607479	0.073320882617417	0.679622815874591	0.39569337279272	0.574691776722659	0.149736244141994	0.200891777509069	0.734714150632682	0.476757803702536	0.414019658561821	0.626200240617001	0.38531742440891	0.329132374750966	0.589893022208482
35.6666666666667	0.698465821121937	0.532410926967716	0.553574093418892	0.852136735823488	0.403397974094162	0.495630065151755	0.620566319698944	0.525460464104302	0.685929940003871	0.710332103321033	0.0845679287802048	0.518317313280271	0.722335277890833	0.427283976559035	0.409226447709594	0.247861078709375	0.491190765492102	0.334278477184227	0.621313868613138	0.542869489090419	0.79358084045584	0.812713156800222	0.903256135005831	0.613658567331631	0.085650225249643	0.323193600897156	0.368952351064386	0.343807401607998	0.18744437368964	0.331534396693657	0.318135160189016	0.574920668438063	0.591614661950571	0.665060927208498	0.680180934829955	0.202618248460762	0.0835195310552061	0.365651258706553	0.325276772725878	0.428895184135978	0.195816753738218	0.210882708585248	0.833473221210544	0.42558893743525	0.400450816643264	0.660081874375611	0.363380172447225	0.363666163824655	0.65232981066114
36	0.539849553508594	0.815822816887132	0.541859423966572	0.930735021854064	0.400983233028704	0.432438158800783	0.614345246265931	0.70512723955849	0.403173988774918	0.715913284132842	0.0677893304179032	0.558924445958791	0.820558042780265	0.44642898834956	0.358096678602297	0.241472378265729	0.630012150668287	0.395939662016559	0.709197080291971	0.652262727844124	0.48735754985755	0.773312075419382	0.728905338823697	0.805143235321925	0.0666314509860007	0.34638920437478	0.345677075160835	0.371198319732603	0.110291844950155	0.39554228751233	0.376185308281896	0.489799808783074	0.470317885867484	0.647106942247914	0.604512201932205	0.280970080102136	0.126352245874293	0.518742833672753	0.36895818499736	0.367956748992539	0.207771003585216	0.173548972188634	0.846429671812416	0.411130129273456	0.366691301455916	0.661502234038571	0.457360032059154	0.396433640767121	0.608845990908987
36.3333333333333	0.710270084293824	0.623029750139374	0.558200268616624	0.923017705927637	0.342645565544741	0.324540494729594	0.600665100606827	0.636298211700516	0.444010063866848	0.571586715867159	0.14165867154555	0.457897007803308	0.734364401031068	0.251430038990451	0.357936164958637	0.26177077791823	0.762316359217939	0.269744055045178	0.43970802919708	0.813173430905989	0.455929487179487	0.615884514071815	0.627829481351011	0.659985503135735	0.0435990118080177	0.429699412671757	0.50086301584811	0.311692613448162	0.128263565371854	0.329546690469136	0.397630513916209	0.435830884466264	0.699867078198572	0.665921361182309	0.709778298989222	0.165532401210798	0.100025577052076	0.350478325603683	0.30288631531021	0.311247655907113	0.144766071530674	0.264313784764208	0.601149559618797	0.457648304130445	0.379173749168576	0.672565624653627	0.44832400429179	0.294582672955374	0.520216245510787
36.6666666666667	0.713354080978371	0.604682986163905	0.464930607372034	0.987918233351784	0.346719667137231	0.790931723078553	0.606899123818009	0.66761228127432	0.585871879233598	0.853874538745388	0.122001829581204	0.292852514142599	0.747931081264414	0.440475356634213	0.103319854303001	0.281312685157619	0.580884789572517	0.538278325961211	0.535532846715328	0.849050462422555	0.707888176638177	0.601195757659781	0.675493299692952	0.600390785036715	0.0468468510030703	0.364203588052033	0.8849835242429	0.312558342617965	0.081131555525764	0.333563357198309	0.404616880327387	0.473156311038378	0.510126838939329	0.712827131543388	0.554001228569833	0.261222535675309	0.130451008684937	0.384876696387315	0.379115263711088	0.207485137453617	0.177013957566119	0.202055622732769	0.777041743250853	0.505821809828386	0.519865494050698	0.667552158763179	0.446733973654614	0.350630462041793	0.52413965506055
37	0.642637974445991	0.521818458263646	0.469556782569765	0.973838744361524	0.366520543873988	0.693786747179405	0.571691266928598	0.587092779019072	0.667621443777821	0.762915129151292	0.0825821638144537	0.331501257031495	0.770587437254104	0.235740468352362	0	0.26295188220193	0.527449464265989	0.478545234584704	0.417985401459853	0.710952231301069	0.585292022792023	0.735058228199085	0.856949039582986	0.659103085310894	0.0849213067939352	0.43028588266595	0.428840420524086	0.27676232346653	0.239748932161038	0.381549585769524	0.0408125890253005	0.548203088798559	0.621623448306936	0.744075427338775	0.558664209527	0.19110227951321	0.116887127986603	0.506944705902487	0.331730093917862	0.397889318916331	0.050425969416603	0.317185610640871	0.686877808824623	0.48107067249223	0.389719902446234	0.655615265306302	0.514032343550034	0.288293965259346	0.527829301152215
37.3333333333333	0.497014528564503	0.494348993968882	0.947172063871064	0.906208844692993	0.419681997176611	0.350813072726309	0.525416529614848	0.536213692164788	0.668898780723825	0.588745387453875	0.027466030031906	0.354352322284088	0.614254058698503	0.546543391468796	0.303319854303	0.216293382399594	0.618855627968629	0.573021813920078	0.762160583941605	0.636762593157942	0.555867165242166	0.752984195203105	0.76811939161688	0.596577479436514	0.0901252309587354	0.642922737584716	0.76102306605994	0.222993013942003	0.152621837911914	0.379569380323209	0.147740170476384	0.512921806354737	0.575573929303625	0.711336520574673	0.641648517339588	0.122392562238742	0.0770721835885407	0.45655194838533	0.290690071055959	0.33486414236125	0.200772102656194	0.300634824667473	0.371954782571741	0.375703797126255	0.405675855443057	0.678291105465559	0.501247463060874	0.295464237748796	0.538932588343504
37.6666666666667	0.54055956085889	0.524808676701637	0.70705864796299	0.9085119513421	0.450615449389504	0.613803697229726	0.574092155801371	0.626331601101265	0.512599187149216	0.533671586715867	0.170675383208014	0.331884974055316	0.875729209062543	0.407672013261423	0.309479565378442	0.292030474442758	0.505136418866673	0.241616574042569	0.445197080291971	0.678577040495645	0.434962606837607	0.729481491751005	0.733284935615167	0.777094954460938	0.0220728503248993	0.385018981602007	0.52005858046969	0.214155048330272	0.207650456368491	0.490869677729065	0.237611069660178	0.568236874365787	0.583414062676009	0.754703604733599	0.588373261852907	0.0904701109898486	0.112535811894455	0.486890969144148	0.328321797436431	0.262614212185293	0.283909727942874	0.268409915356711	0.528569000138117	0.416996982117923	0.443810509201094	0.677786822732508	0.484403479969492	0.275974335962115	0.516143990657095
38	0.537134635534773	1	0.660796895985673	0.895494945253501	0.492111845852837	0.590709253668096	0.544398314456873	0.557335207826007	0.975769305206117	0.577536900369004	0.118816796447935	0.311140371966685	0.495997829331162	0.371856832667927	0.309158538091122	0.248188078655689	0.570473876063183	0.366942648671128	0.674218978102189	0.771398267037802	0.528846153846154	0.616497989740746	0.781484302477804	0.699694305253538	0.0743865897457783	0.364332325367831	0.840002092159632	0.254912072028667	0.16964581634287	0.555455128469579	0.168898234190238	0.489999237478517	0.582400252326131	0.715166057697551	0.636427095549226	0.17692481930688	0.105613921637703	0.428237468553728	0.328447731650336	0.355492159757411	0.364177909732178	0.308025997581621	0.611412725901215	0.291417053285888	0.396859064370704	0.694524311639389	0.33434595447083	0.308818193969715	0.583111973650565
38.3333333333333	0.62101871979732	0.540215903907557	0.438367407849575	0.890526088090648	0.419285731976125	0.703797870649928	0.640218903050191	0.562038176051682	0.778362686278305	0.741466789667897	0.213352595997233	0.208621054760081	0.864694975806087	0.248278116317621	0.23678849240647	0.21802111345922	0.656329393571192	0.627613322747722	0.595737226277372	0.522806860016163	0.560229700854701	0.596111188132538	0.628067502915764	0.733982540733037	0.0587517502116402	0.343345282063459	0.573147131126105	0.161725736999006	0.167923495436315	0.600782331166859	0.169551651631283	0.504041363857655	0.492847004753644	0.578484303139372	0.578656391355336	0.107829005621564	0.0475861858180874	0.564071671829274	0.260561117650003	0.309300562582293	0.352689547390289	0.246871221281742	0.429979919892056	0.415724516913652	0.478057793215579	0.683677461644784	0.303902684954173	0.228850401318846	0.63361251369186
38.6666666666667	0.440720641821622	0.603973442805737	0.336964632144455	0.931962921255384	0.474787626619115	1	0.568000580150062	0.573695177365501	0.804451325720921	0.706273062730628	0.171473035989201	0.290136243426259	0.779631890743002	0.334500712101048	0.104000493888134	0.232233409633321	0.603584447144593	0.24660693357529	0.696058394160583	0.752003456945317	0.718037749287749	0.596357271592957	0.68106300430819	0.687750149695881	0	0.471478962892184	0.486636330352006	0.182578517871661	0.163514353915534	0.637652406437168	0.102190870243506	0.491052103679459	0.477549733029941	0.689783255470118	0.542860333947618	0.140281695941354	0.114564281244621	0.537778310201428	0.261586351314479	0.542101903203926	0.270439226033794	0.274773276904474	0.647349744483283	0.332676456015495	0.463306481413051	0.66346431227066	0.330273924790258	0.263893397493428	0.496012663300473
39	0.552198051389519	0.542243170645178	0.59274735114162	0.963557472690372	0.627882210169156	0.776736055935166	0.456761985667186	0.666758717646173	0.538687826591833	0.462315498154982	0.154571721814409	0.332591905003766	0.696015918238141	0.327659872522239	0.264446227929374	0.197478683996037	0.696730365624655	0.452648293070205	0.44	0.502542201670109	0.498397435897436	0.654235408290586	0.750422488277437	0.769027134348114	0.089929161120966	0.626710418281843	0.48260892306083	0.18617317594628	0.241938607173048	0.545722868747633	0	0.599397608028765	0.636222317345169	0.650076045396981	0.653068632378399	0.165218376129976	0.14302719693204	0.480389505929869	0.323153651042752	0.493292901887244	0.310471668745513	0.204186819830714	0.921931940120906	0.454956983919643	0.561163254748355	0.650993040604669	0.262355055133989	0.304973680357973	0.569461141834308
39.3333333333333	0.567164505888057	0.636612437281435	0.60774511266975	0.875256872737452	0.580986700349209	0.89141374013454	0.461755420129653	0.682800692892828	0.569692277917554	0.754520295202952	0.208427229523193	0.27384976443596	1	0.414699633443067	0.455872638597358	0.24034496054038	0.531757428476748	0.492306529053722	0.538627737226278	0.535343898715992	0.424056267806268	0.730840149729655	0.842774855401899	0.616715514796256	0.112015851669708	0.45297798019734	0.413776871175271	0.113222319250805	0.201208045193701	0.497215336091119	0.0127133781003415	0.476529002211312	0.705431770563454	0.591718020032357	0.651560842128776	0.136796532339436	0.104964039308229	0.567864049424127	0.28974233536927	0.47823484818258	0.325056065325899	0.115099758162032	0.666755203297813	0.389734696635287	0.523065553174193	0.708259593300013	0.230179557118295	0.239142749845647	0.519913784220108
39.6666666666667	0.524964421437843	0.519537783183823	0.834502313087599	0.869397311345663	0.490588701488471	0.787488744107209	0.565625590833629	0.688424170913564	0.356996322817882	0.744372693726937	0.145513063656039	0.251103783513542	0.866051643829421	0.288319208050244	0.644473083096679	0.229466111580191	0.534518943996465	0.23250538731995	0.592759124087591	0.586810855706205	0.341969373219373	0.772060862331901	0.599195487111132	0.626453625791812	0.113113842761217	0.565142512208589	0.526125843401852	0.146082387304646	0.201900697493418	0.622343318119255	0.060340500576545	0.543935901271065	0.689683916462027	0.547036047335987	0.531412296867147	0.215663159195272	0.0673609468978575	0.307295535057245	0.339475048072964	0.482224793520329	0.272652191683061	0.26706469165659	0.702639099901193	0.397504616909148	0.457859729510014	0.691854622701825	0.333596183926471	0.386259046382402	0.564324070575573
40	0.447870759895532	0.697734529420708	0.579018057006416	0.76360709764027	0.642531639299601	0.65067005667673	0.456210325117131	0.474330329124093	0.529862589510354	0.62610701107011	0.169158169526317	0.130675548946211	0.695292361959029	0.430856155588242	0.755830966786023	0.226767141874051	0.497100408704297	0.40368984159389	0.530744525547445	0.585329307713029	0.43019943019943	0.816199916816859	0.727715230999928	0.533074910970344	0.0577783211347138	0.715078572675076	1	0.0780548947574451	0.271506667709369	0.601026106458545	0.123170318117073	0.6219037228645	0.673936062360601	0.56991631976635	0.691377673535489	0.192131869942137	0.055714540795398	0.414349768110486	0.235702026733573	0.604269241511391	0.269888631709574	0.305169286577993	0.720020611327731	0.215057880275663	0.422363461680585	0.691254915288575	0.277854622076864	0.316484943382535	0.587397955094517
40.3333333333333	0.580995574183257	0.862145861841772	0.394344127742128	0.819492425832967	0.546202045719097	0.788018433179723	0.45392598424789	0.416480472639938	0.419818076253145	0.871494464944649	0.195575537160579	0.20001528499348	0.66458644236422	0.37844084891784	0.448059945672306	0.229846798084854	0.547083839611179	0.524252391213943	0.482452554744526	0.619724791236419	0.54162215099715	0.857919728268404	0.657284649989289	0.924931455043963	0.0908195488548368	0.843066351212562	0.583712537266594	0	0.257379912338521	0.57358450939285	0.0850143570960232	0.651052572923449	0.630950503525807	0.612265425702738	0.614061540179818	0.160214566645388	0	0.550233600876217	0.238483881227891	0.744164704943543	0.253262800788621	0.361608222490931	0.526189135492919	0.2172649880636	0.588463528194516	0.685632933552859	0.287808472407151	0.32488367800289	0.583202616624112
40.6666666666667	0.553899566801683	0.811058740053723	0.445082823459185	0.828062272949949	0.526723134457736	0.627681550929604	0.436516302475739	0.574908576640809	0.523592026320882	0.559409594095941	0.212170061804145	0.140512079125317	0.721566499344277	0.475730195419206	0.506832633658477	0.222003679969545	0.523169115210427	0.473214623265661	0.550773722627736	0.529159558229326	0.603855056980057	0.806512546790517	0.57331064194416	0.609593142352904	0.104175364862901	0.811245347576449	0.582195721533553	0.0617415459664549	0.129706590996265	0.708358492193565	0.0452169391123476	0.634341621355294	0.613873431410097	0.545678743039271	0.704947785782096	0.137779791199061	0.00270569821330602	0.566075676415724	0.242607419462648	0.770857439253082	0.323662638151528	0.308872430471584	0.74756435727718	0.376188009549119	0.557534550291922	0.687035676351782	0.316390242641261	0.326665902856015	0.494528026807421
41	0.573385671613781	0.437332116973291	0.814206834800775	0.858072643292043	0.47482477648166	0.440065681444992	0.43372951021349	0.776659218905597	0.549874201664409	0.517573800738007	0.233762466810951	0.0813400481158857	0.64292497625831	0.39359342532278	0.581286269909865	0.189625804688301	0.574478073566773	0.411477826925258	0.602919708029196	0.659490886235072	0.379050925925926	0.788849993068071	0.619558231975817	0.769436828338218	0.0733093589900329	0.723475106494368	0.687640566975261	0.0674515944472882	0.0858572316996421	0.661486129185903	0.00490628320785022	0.66661094394294	0.785545317322639	0.566001951124926	0.698414028033729	0.173614686077878	0.0347574442894807	0.610038847911283	0.308182010458998	0.897310776842358	0.283380310323432	0.310278113663845	0.628751739744802	0.278309535606504	0.513332347941763	0.70091629714071	0.313830681127759	0.410395462964731	0.547530312918627
41.3333333333333	0.496855011494612	0.807409659926005	0.514624682883152	1	0.516754588008024	0.754383177075057	0.403629045834445	0.542163532749228	0.664099090381266	0.77679889298893	0.283144425355318	0.128664616991499	0.849590738479628	0.368471434241554	0.611848685022842	0.190958207454623	0.527339003645201	0.331556462893652	0.64029197080292	0.696445407201221	0.492476851851852	0.711312907250797	0.542034608335515	0.908953389429895	0.0725273863429285	0.750964814661177	0.714838642188399	0.0244361468276671	0.143503777934183	0.628250180956274	0.0371679214994688	0.67148228310663	0.700655597359587	0.547732877666891	0.686463394203384	0.189707184482013	0.166225100578942	0.488299419848374	0.292419244685334	1	0.226681800951681	0.253098548972189	0.628969539857421	0.432762037746047	0.379883231098958	0.699703669666183	0.267538813552749	0.27506731081365	0.563693386306995
41.6666666666667	0.393165788280187	0.732248745628706	0.591628115206685	0.914225182753421	0.492037546127746	0.437523173896922	0.480620656968146	0.737303241031306	0.564157151151539	0.664621771217712	0.169844262477967	0.266583023785679	0.699362366029033	0.364362260979197	0.72571305099395	0.197376191475551	0.365707500276152	0.40788628029186	0.380613138686131	0.642655113585346	0.326655982905983	0.722889227783169	0.603313260181372	0.626800289937285	0.12960446946962	0.696835064611828	0.297557403629897	0.162632870607365	0.130537028968507	0.825948192124933	0.149817992719709	0.624827699472687	0.631265911190214	0.531784552180473	0.789384039760987	0.264151720445607	0.0669475316536126	0.529077747163418	0.338546686880723	0.82862386785301	0.271176175360057	0.390447400241838	0.740355704769291	0.3459078419891	0.370556499889143	0.695595270165621	0.416070943805991	0.476013163003558	0.686389623574043
42	0.312318783916926	0.419441488013785	0.734815699149381	0.853625484320424	0.557136488594992	0.651411621378251	0.422434713693355	0.70269207273701	0.535397716276369	0.592666051660517	0.162776947276825	0.199114107252889	0.661511328177995	0.361163643155658	0.964819730830966	0.21687905394523	0.727990721307854	0.493554118936902	0.448759124087591	0.552420984107031	0.485844017094017	0.774979204214613	0.667222050317758	0.724811698339164	0.0685160281325617	0.78056295397784	0.326952246456406	0.197284621638712	0.18705149832609	0.819167488626945	0.157019150331231	0.618425451793978	0.775069277040575	0.444911017796441	0.661752387334562	0.295394642011408	0.0486253540973954	0.419725155306077	0.357533691438572	0.758692095918287	0.278573198338899	0.377025392986699	0.75057106127089	0.300290527453718	0.394996674303451	0.709671144530955	0.407306384683997	0.408409555271248	0.70213764755722
42.3333333333333	0.398927169510345	0.913739800314226	0.470825249962691	0.757588481921885	0.537459444733388	0.522697176757243	0.512837115100218	0.570280922852911	0.634217147280821	1	0.239312568330395	0.223191156357523	0.810880477547144	0.303074875674161	1	0.209538637239925	0.687810670495968	0.413821783675475	0.698919708029197	0.603495106402083	0.58943198005698	0.831848745320948	0.735736557732131	0.676499322429171	0.0480763242210837	0.833708578768642	0.642449918928814	0.143639525429853	0.153294008557608	0.63238686013674	0.454737841687581	0.710801996633174	0.634712866379796	0.516284621863506	0.865443681241972	0.242226592261598	0.127269159061917	0.24784796262386	0.305934569103171	0.716805649762599	0.244963650186249	0.391792623941959	0.563794184205773	0.233874600243232	0.548296504323405	0.698248076275149	0.39836084646509	0.408937857638425	0.757841094280142
42.6666666666667	0.406662183507186	0.662460088186103	0.366064766452768	0.731904389263197	0.583760556752606	0.483923936649186	0.446979723237341	0.608942334245475	0.443235920263209	0.656042435424355	0.145490751690131	0.144806206981102	0.873875096097318	0.380728911302561	0.830170391406346	0.185174700941467	0.749779078758422	0.445616422819553	0.452262773722628	0.738243018766274	0.568420584045584	0.904762234853737	0.544878966034323	0.563928019917431	0.0111944343846521	0.678946299374337	0.505204247084053	0.082033484898672	0.124502388905647	0.730005738095327	0.429417350607068	0.682453794130931	0.664563948903958	0.538916459132416	1	0.3281819492206	0.0917717497438272	0.30113292146561	0.369771913764125	0.771571639468539	0.165830539773028	0.428688029020557	0.517105277137363	0.23494437187514	0.335075012933264	0.698814018032328	0.334009850433703	0.283144608451565	0.84263902723869
43	0.413505778584051	0.721402868582434	0.402626473660648	0.757537584537375	0.457872055873393	0.551724137931035	0.538855809399985	0.72375501050218	0.715734468743952	0.855535055350553	0.2435964657846	0.0828701396507061	0.578845023289468	0.390044593868927	0.798999876527966	0.175257329435364	0.702419087595273	0.219727042455862	0.626569343065694	0.581518811169974	0.488603988603989	0.818026479966727	0.709399471592126	0.787116699757335	0.0599627697978635	0.66377246108557	0.548825775406664	0.0893545424433135	0.19407484368774	0.603531366379262	0.297101449275363	0.886721568213412	0.76148421835222	0.567171414202008	0.755933433852683	0.340150937956881	0.0827779574069694	0.424174695805453	0.310597364100031	0.651007461197782	0.196538879371137	0.335535066505442	0.461768111938633	0.432694473221927	0.256344689971178	0.705453373666165	0.307418850265652	0.356317668849892	0.96542972402554
43.3333333333333	0.233229595108143	0.335360600070955	0.377257125802119	0.694030373014207	0.3454689550982	0.665024630541871	0.484236235033294	0.814182545460632	0.40824462937875	0.818680811808118	0.430180280684531	0.354500395658425	0.74838330393886	0.291401087997011	0.47966261266823	0.177292538056449	0.731635921793881	0.379380741748894	0.415824817518248	0.675810361856873	0.549768518518518	0.905531678913074	0.685323590317282	0.744634584475749	0.151273646599111	0.674360390102675	0.349286050525656	0.143462615556024	0.177378571721166	0.693469447455174	0.39323746862918	0.969026963932734	0.651834996733278	0.531063484272843	0.87541185011448	0.298828326091881	0.125789229004699	0.41216264781887	0.274234667105822	0.676271795076408	0.269225800850033	0.324274486094317	0.565494087523772	0.227095626323138	0.350986623309437	0.753641369094589	0.274390165078791	0.340245819727956	0.878110008129244
43.6666666666667	0.291134291478348	0.655161927930667	0.598418146545291	0.744717805813754	0.446553731084528	0.695799565654961	0.382640045376023	0.837914961631478	0.447300174182311	0.5375	0.475836140922377	0.251535266141988	0.806448695337584	0.320235343559571	0.661041486603285	0.178429716974226	0.40000552303104	0.224603984726475	0.388262773722628	0.656269641734758	0.461850071225071	0.971724663801469	0.574667364863256	0.782137342031451	0.107808423621572	0.732234965627136	0.77509283958366	0.224419585052245	0.242772769082385	0.681933250574747	0.389755590223609	1	0.667199855813639	0.608660086164585	0.811246998380521	0.235570290138583	0.0703722828403718	0.471122482159054	0.311982640452976	0.642979691178232	0.317847515019578	0.209280532043531	0.533844012621782	0.315143462006216	0.380415342546744	0.748460542995792	0.348914771772432	0.226578064631111	0.70221874916513
44	0.467528892920257	0.451624347473519	0.750037307864497	0.708968755368083	0.371733907917874	0.473118279569892	0.459237983253347	0.499711294655186	0.521540545771241	0.644649446494465	0.316344630625404	0.265551286725779	0.798806132139466	0.440148490579253	0.698379429559205	0.194223326321543	0.628161935270076	0.279875997126763	0.74265693430657	0.708898267037802	0.208155270655271	0.949188964369888	0.573953300168995	0.563864990072799	0.109240886789276	0.713387822594257	0.64553585438569	0.127401457436237	0.29119512313198	0.637528643596774	0.524165140518664	0.586572583246817	0.804176898641494	0.516884501887501	0.777405483888982	0.162778246813418	0.0805065864930643	0.402887067239402	0.319167348810325	0.726860312013726	0.298871069868302	0.310776904474003	0.474952987048862	0.287284356560515	0.396829502623605	0.734764165243249	0.350892614760138	0.33052314664528	0.643512634676376
44.3333333333333	0.317001079086061	0.608585474633825	0.673556185643934	0.683367370959225	0.494761869381083	0.256051697653477	0.40298155692593	0.912936509928953	0.66297658215599	0.656826568265683	0.256621075882996	0.236632397498993	0.748247637136526	0.536760757395344	0.619599641931103	0.179454642179089	0.669860819617807	0.553173793051302	0.789839416058394	0.755230313369848	0.544560185185185	0.853212948842368	0.557898745626354	0.67164602439255	0.108336658831562	0.574772063430306	0.418013494429625	0.111686590984372	0.224516167472899	0.841216026162715	0.46961269755138	0.705531800078598	0.807736499425508	0.541285682257488	0.78821131401128	0.151483639808085	0.0624803949482907	0.282739205585885	0.298449556081896	0.652619399114233	0.341919075340363	0.35456469165659	0.563926989152492	0.340480158551416	0.576454068435445	0.706522864120394	0.383339581421203	0.372819161463207	0.676669834400058
44.6666666666667	0.231018250629467	0.714054026658558	0.573272645873751	0.727100948600004	0.457909205735939	0.514063244875258	0.468857078478246	0.681286035866409	0.823959744532612	0.72689114391144	0.288320801445816	0.398812547069023	0.364039252928142	0.519273423454974	0.354962032349673	0.186716969344975	0.607312493096211	0.438433329552758	0.739036496350365	0.698403968752806	0.35999821937322	0.850835297379731	0.631756837169448	0.697960984526173	0.165561371012574	0.729027976049137	0.549819551231759	0.167861121985004	0.215446518677406	0.817993616837747	0.302728978724367	0.744971757377395	0.702593101583797	0.551822968739585	0.78298989222092	0.153728146943146	0.127409108969502	0.368605069053446	0.285371772330316	0.66708694090891	0.30174686637711	0.311547762998791	0.728976976934437	0.472703932255304	0.420449338555909	0.645003306832187	0.399640627221842	0.446437778074815	0.69499879778793
45	0.368840999014748	0.715878566722417	0.526861662438441	0.669847753198582	0.410580280852961	0.437046453731659	0.514756272225057	0.601603360697579	0.457905941552158	0.645987084870848	0.204734599165532	0.370175474909524	0.454981232759011	0.490042259111391	0.433451660698852	0.18284177595135	0.554291395117641	0.370307360780311	0.740262773722627	0.854185373080722	0.627849002849003	0.770695272424789	0.675731321257706	0.697173111468281	0.141977629584863	0.552789451550426	0.822166431298709	0.0802493300009033	0.224136325889183	0.906206518926339	0.294716136471546	0.746444010393754	0.656881519363778	0.518102440118037	0.930278661975763	0.130047567077817	0.141307582550338	0.560055105847723	0.311170526227415	0.511295535251167	0.305264317040683	0.304836759371221	0.529923610594647	0.369600468447367	0.416805853225926	0.653504177765903	0.495947360936955	0.449773084585665	0.800840212657957
45.3333333333333	0.381358397322615	0.713749936647915	0.514251604238173	0.725045966700386	0.376167124848305	0.662111340643042	0.56686358962671	0.655963648231366	0.638281401199922	0.657057195571956	0.256894397465361	0.150778499746046	0.645412200967756	0.451121850995774	0.664575873564638	0.218011352266793	0.687948746271954	0.474310990132698	0.703124087591241	1	0.645877849002849	0.760470677942603	0.563754076119296	0.548643282594308	0.243036637379215	0.549576740313947	0.844814059312726	0.0579549218585323	0.243925327613366	0.748517658707091	0.371640778674625	0.596576278543232	0.743798860026584	0.491768313004066	0.925559836935277	0.131658876099088	0.0508693784776344	0.515183201273253	0.407584468759435	0.572537206240274	0.303125469858137	0.212424425634825	0.548420683573622	0.473413359758569	0.462574828172345	0.674141599948911	0.328709748309784	0.372354509983642	0.757923150024617
45.6666666666667	0.285300971177455	0.640362880746035	0.248171914639607	0.727336349003365	0.275515763925007	0.538058159860162	0.559166241482284	0.649628867187173	0.805844784207471	0.721448339483395	0.265651844083982	0.204666062697133	0.80106724551169	0.456468445751909	0.480897333004075	0.176692224722172	0.587457196509445	0.419038977732411	0.441051094890511	0.822556568196103	0.80982905982906	0.756041175655067	0.666412776997596	0.6252245438215	0.290879984498949	0.508947243447986	0.547936607563157	0.17251347526273	0.272869628686232	0.849084342500535	0.346978226955165	0.723412928845015	0.715547344943339	0.533456944974641	0.939800078181717	0.173069003150547	0.070658617134051	0.582047815446751	0.35974399834671	0.534624745640985	0.342723790121914	0.222188633615478	0.787666138988345	0.430408540155848	0.393984184465302	0.689655450841242	0.431596364905568	0.375552967086126	0.772120702091849
46	0.297408629560703	0.623637930160661	0.765482763766602	0.67500747555335	0.308232409540085	0.563165421897346	0.470890193650983	0.58597143072327	0.565473195277724	0.597324723247233	0.286781275798211	0.149105111397351	0.804730249174694	0.471597674581495	0.844562600321027	0.225913037536666	0.7763724732133	0.256323012362482	0.721693430656934	0.876975397324234	0.455350783475783	0.735633578261472	0.624568585913884	0.752198165831521	0.225616408969388	0.673456368062847	0.743030493226633	0.143488963835105	0.244617979913083	0.730917082647325	0.429209342286735	0.668405802201927	0.771780025683196	0.541649245908394	0.923102697269224	0.129368037394725	0.0545901156758373	0.580932007598446	0.451438636939734	0.489494473925707	0.376604400095719	0.209295646916566	0.776611455223484	0.186523129588757	0.506791811396054	0.700808393848485	0.438240883177993	0.361167866485898	0.722463618772828
46.3333333333333	0.426889573526422	0.421468754751407	0.761677361587823	0.784780409596702	0.322510340045075	0.559563536204247	0.467725267866162	0.557912618515636	0.669634217147282	0.707057195571956	0.255711863272273	0.14896977551758	0.506896395785285	0.50675912306507	0.908581306334115	0.188356849672756	0.595658897603005	0.431590488072284	0.469313868613138	0.794536230582742	0.520699786324787	0.731623457645917	0.647168733487254	0.870536699127036	0.2536128750989	0.524347087246709	0.603954181704064	0.0927873468035774	0.210566299114075	0.724556422728858	0.377969205724751	0.600347827107052	0.746862820195102	0.499057764204735	0.8665326408667	0.301026501657641	0.0260660724425762	0.609135248917563	0.415602280377996	0.420624027450824	0.302371579168052	0.169996977025393	0.78633277732329	0.281181027881627	0.580858768753233	0.66082545284516	0.332549090580038	0.243830637718243	0.845787677898762
46.6666666666667	0.370336080571759	0.633115402159039	0.850246231905685	0.771547089623932	0.328590534215023	0.800466126383813	0.556889670479945	0.881647545167742	0.548016257015677	0.648293357933579	0.209827305383877	0.246551721392782	0.310903088680866	0.342182064392613	0.75719687615755	0.22657679862172	0.588948414890092	0.380628331632075	0.407649635036496	0.634248451108916	0.449563746438747	0.878937335366699	0.655237664532407	1	0.39436795157767	0.502158495661552	0.817720592081176	0.210142581830227	0.16974822461299	0.811194161394245	0.24696240023514	0.608046361306141	0.853403023407754	0.449982730726582	0.975651979672753	0.268131087453411	0.0492736278072423	0.592726712645252	0.31734291724992	0.542121852930614	0.381917635324438	0.38642684401451	0.740079470480117	0.288635647042926	0.711728623161629	0.68779246746936	0.373424512325969	0.49885110147861	0.797563707698355
47	0.44930954131023	0.502306015914044	0.756827339203103	0.805342952939006	0.283626817247443	0.690343768208062	0.560769424019766	0.846433861371225	0.776891813431392	0.985147601476015	0.361816417144515	0.307143983046395	0.510242843576177	0.354649669631809	0.845166069885171	0.185950715739435	0.844112448911963	0.401421496351744	0.692554744525547	0.712029720750651	0.535968660968661	0.793490919173714	0.627139218813224	0.598815038920929	0.290206426938612	0.56581480707998	0.669909514095926	0.288088319431479	0.164931311980278	0.678932939292452	0.25642451785028	0.592561309659974	0.823214004100299	0.503299340131974	0.919668286145083	0.279713979778844	0.031940751321883	0.69071415125015	0.439072865859073	0.576275785021746	0.339259281220286	0.338119709794438	0.587555645272675	0.316494752488626	0.6950705786712	0.731637905912733	0.501131119355715	0.44728433488005	0.762234893155788
47.3333333333333	0.529236976682358	0.367695504536009	0.76533353230861	0.791244377429555	0.376575773336305	0.434609883998092	0.500887059804666	0.806483736265575	1	0.756503690036901	0.429226444141993	0.334749318145994	0.670646226201782	0.404403352711821	0.940308988764045	0.182812492374068	0.865762730586546	0.457789875619069	0.539328467153285	0.62662184609859	0.516871438746438	0.614875918480521	0.673196391593078	0.70946393117141	0.312807512473502	0.53215715107181	0.684397719546001	0.277661928995152	0.171437030085688	0.767322109668878	0.214492753623189	0.612114120138192	0.699236262869759	0.512855004756625	0.990729882168984	0.382770833762329	0.0518490278307281	0.477019834682457	0.378085186423	0.430578941068507	0.212705175798415	0.238799879081016	0.470692604358127	0.417560019818927	0.483105461532777	0.76502406537031	0.376126271701333	0.373325186019719	0.821477232393318
47.6666666666667	0.641042803747087	0.380011149967057	0.388971795254439	0.772984940736358	0.382519751343586	0.365591397849462	0.479965398192729	0.785680214897196	0.824656473775886	0.662961254612547	0.32272027488342	0.210910619408439	0.654863654863655	0.189699049753683	0.625992406469934	0.193984177107075	0.613222136308406	0.396960417375524	1	0.812634686181198	0.594150641025641	0.698630944128656	0.76915478542356	0.826226718351139	0.314066972843174	0.581460682193341	0.667346618546995	0.159215122406576	0.0983491786856737	0.816538465865834	0.298745167197992	0.470763166693062	0.666276161939307	0.513103439918077	0.989557156419277	0.336362045178428	0.0507278199504223	0.543946057878254	0.443167342352161	0.657858197342696	0.25731390441259	0.356030834340992	0.353850812235054	0.314771857123553	0.620885374325623	0.768556980645673	0.354900009048955	0.320256258473525	0.656536598770309
48	0.655734013105422	0.843140236176576	0.884867930159677	0.859771343500086	0.451222230477747	0.823454632130939	0.44933917281997	0.815278788943841	0.891310238049158	0.951522140221402	0.215355094937415	0.241994882711558	0.68452946230724	0.465037005906937	0.671444005432769	0.208811428404094	0.71415552855407	0.431439265056141	0.657459854014599	0.757362844572147	0.509793447293447	0.652762373492305	0.74361507152548	0.795720273549526	0.354480426463431	0.44750235303205	0.666666666666666	0.30661868770514	0.101685826323022	0.773956547991854	0.283560559813697	0.586384885651105	1	0.472141935249314	0.966661082258334	0.238092786689455	0.036740872290079	0.40420652713364	0.44464141847132	0.813134900051869	0.244048816539854	0.256786577992745	0.451079969826716	0.190329264447547	0.644423915453403	0.776591004682416	0.408844707007769	0.50854194911748	0.671159695744933
48.3333333333333	0.565772641258621	0.872028787187675	0.753991941501268	0.676897040953308	0.36046511627907	0.475925631654218	0.443527312377139	0.517234453844802	0.734313915231276	0.842020295202952	0.27911153751757	0.328749958205096	0.561298783521006	0.385842030305153	0.441469625879739	0.213291815728209	0.652380426377996	0.417110884276587	0.555795620437956	0.713000583640118	0.500845797720798	0.641439068348815	0.62036750529598	0.713812990450979	0.274703069530978	0.517455349607637	0.508708614467285	0.304680207172754	0.0782157127801798	0.683268389095369	0.285030183816049	0.622188202033	0.80419942776038	0.472141935249314	0.969872117049198	0.261907213310545	0.0496210896467632	0.600612667499529	0.357341561035309	0.618122331724055	0.351156353964385	0.274108222490931	0.457024319241843	0.204134948876177	0.436974355184391	0.733539059156695	0.359062528277984	0.468410064478349	0.691419831537648
48.6666666666667	0.473850147787874	0.70457655466018	0.552529473212952	0.658682139471558	0.271961760408153	0.765082896339848	0.33009243551658	0.603168227349183	0.581459260692859	0.637130996309964	0.222779401593074	0.169892702530144	0.618278840501063	0.383367187317597	0.381605753796765	0.230222603993304	0.787832762620126	0.330762542058902	0.646014598540146	0.604566983927449	0.578926282051282	0.566484125883821	0.656582486373265	0.645551668715137	0.270913154902092	0.573190024860606	0.405094408703384	0.225093348188744	0.195069134892173	0.764861854417396	0.36928711931086	0.692076228686058	0.756820690742785	0.45987166203123	0.927346847601497	0.207817680126846	0.0933787607516114	0.328636215836942	0.32860272760591	0.494569684395324	0.340722591520424	0.270208585247884	0.472493439435632	0.26398585649295	0.263831202424063	0.764083031216349	0.409478133846969	0.355324715003151	0.732959120973067
49	0.641458799243076	0.541634990623891	0.870616325921504	0.573664420819575	0.250811105332243	0.525292653212564	0.349509332905128	0.674800625946661	0.508805883491388	0.562269372693727	0.27805729712845	0.160712153321222	0.638583638583639	0.518526301043637	0.585536794666008	0.198591459932745	0.619987849331713	0.413368114627047	0.452905109489051	0.639456316781898	0.609152421652422	0.616560377096908	0.527253469164306	0.693611925246604	0.355112463352241	0.653052933923427	0.549296511323814	0.194092715830046	0.061668398297416	0.687945124306647	0.364794591783671	0.683154727339914	0.734697095996575	0.361170190204383	0.841207349081365	0.16195972242242	0.112218913827855	0.385153936987661	0.356274349299531	0.433459681602362	0.33208461364161	0.23511185006046	0.398871689172679	0.0832057114544388	0.355494789742074	0.766126587444608	0.411404268521272	0.314677258174365	0.600953373254407
49.3333333333333	0.5611466462318	0.362627337691957	0.543127891359498	0.668238123413433	0.220583500507715	0.727051220933312	0.380454122820876	0.505142302446046	0.576736984710664	0.508671586715867	0.422058725094268	0.188478299289726	0.614073169628726	0.597184282412271	0.595497900975429	0.216171367494253	0.785402628962775	0.338928584930626	0.460671532846715	0.572579015892969	0.553329772079772	0.556814085678636	0.392795087234903	0.568277079197	0.322221171390412	0.825040266171552	0.288822637167216	0.145465084766178	0.0433000785750727	0.837525643285491	0.410588075696941	0.657780358619719	0.748237096447158	0.406027885332025	0.888591053777852	0.238978234458333	0.154776554690654	0.228942549586706	0.339334582988225	0.502433866656026	0.40094490456718	0.373654776299879	0.618175153788129	0.32956848790595	0.325659596482152	0.763790150851739	0.333531548534716	0.461580324237621	0.631995252216459
49.6666666666667	0.473603052718828	0.746034159444529	0.444262050440232	0.69700787000808	0.249969041781212	0.681921711955082	0.348646877678985	0.657779563008896	0.697735629959358	0.64589483394834	0.29672125660992	0.0835770705991561	0.530321530321531	0.33863323293876	0.528359982713915	0.166579629367524	0.984342207003203	0.540093002154928	0.354861313868613	0.786600969740504	0.683003917378918	0.681055039511992	0.619867660009997	0.683275030727049	0.334995697997089	0.704253194831054	0.402740729117632	0.137722454756241	0.0813549917514793	0.750767892168813	0.398358543037374	0.781845536609829	0.548719219591322	0.378651542418789	0.776902887139107	0.179313469101991	0.173549145742547	0.146227303065049	0.314825847513041	0.62585883573395	0.347890906087667	0.328295042321644	0.751877861946602	0.0696702851222916	0.336996526494716	0.791635072533768	0.501169900590768	0.421387971255259	0.692272829625559
50	0.469142830333266	0.855506563276063	0.372257871959408	0.596052907831199	0.195668326027194	0.52735844059537	0.338354393989231	0.45547661486707	0.774221017998839	0.812961254612546	0.343448091211317	0	0.556640889974223	0.319254745394691	0.564728670206198	0.183661716115241	0.915635700872639	0.486106385391857	0.79614598540146	0.737294603573673	0.459045584045584	0.540784001109108	0.3894151810154	0.682928366581577	0.349267275482736	0.634858059957259	0.274752863643496	0.16652865187148	0.0906369049614014	0.915908775535462	0.369895317551833	0.681345205206262	0.550116024962264	0.353456581410991	0.83894566370693	0.253948479294937	0.141061463747344	0.301831157051666	0.37365004173589	0.538171807046243	0.354123210303738	0.266868198307134	0.520834440041223	0.194968695103824	0.311913384080999	0.794775278548312	0.534573471049808	0.40458731947017	0.595724704885561
50.3333333333333	0.520601160408489	0.516648928082713	0.938068944933591	0.586236074793706	0.235133863338039	0.807193177604746	0.344567697555341	0.418062075833271	0.324714534546158	0.684824723247233	0.315301546219237	0.194667129462302	0.485415818749153	0.395484578926478	0.448214285714286	0.116490070427003	0.927372141831437	0.360704699255227	0.429605839416058	0.830200008979078	0.435363247863248	0.482635519201442	0.499631066574632	0.502127257256311	0.399917881338534	0.614337331819001	0.412103143469847	0.123298653979343	0	0.661624893582709	0.406430170250289	0.688533436567011	0.604388672359024	0.360867220495295	0.605433629306975	0.139597018306118	0.151615617122791	0.457660910786713	0.356418043466678	0.615476997965128	0.542989769533922	0.344105199516324	0.598142855625087	0.152504391694068	0.118697805040278	0.79018241528674	0.347027418333183	0.336573163512765	0.638091230721671
50.6666666666667	0.440808219820778	0.581369418681263	0.704969407551111	0.585205402757366	0.197686801892166	0.683881561523385	0.434084334135356	0.612013489652633	0.656164118443972	0.585931734317343	0.279128271492001	0.236468402256447	0.364446253335142	0.333356680908688	0.40197555253735	0.107373116699936	0.844278139843146	0.263997580431742	0.706335766423358	0.674845110891622	0.339521011396011	0.457333980313323	0.335503296598672	0.660017018058051	0.386861936847059	0.707717659040649	0.14582352633506	0.189813002499322	0.0333348229081715	0.763736737686535	0.375866512921387	0.572037750678937	0.620226642935995	0.362479019347646	0.712430892946892	0.18450775281593	0.209891080365028	0.568271353515993	0.37531463371711	0.544551729641304	0.374073783874787	0.401602176541717	0.554099423095312	0.287554614656997	0.293097332052324	0.81968332218822	0.393875150277286	0.391150617095355	0.636608502501746
51	0.484462724614109	0.557498352845776	0.59379197134756	0.535720420666883	0.201698987047081	0.636315482811589	0.384895896733289	0.717788433376012	0.722198567834333	0.471678966789668	0.331728731118499	0.328971272173192	0.535974313752092	0.331185356400738	0.448195764909248	0.120462875744901	0.77529548216061	0.472193867906696	0.162919708029197	0.772026802550058	0.512241809116809	0.521506308054901	0.395246709351867	0.408212788755476	0.36876584417292	0.622330488715459	0.318426695956902	0.245253545725556	0.18328473595424	0.874391968166697	0.461986479459178	0.629977652255011	0.484871696667943	0.339053401440924	0.819902831295025	0.385571319729012	0.213016628301089	0.394617767357487	0.43194466644386	0.603020388620676	0.379198546430984	0.328007859733979	0.427228201396046	0.112157110040088	0.357416303303525	0.822920420954966	0.500665744535078	0.421671217705131	0.68880168080697
51.3333333333333	0.571943762413399	0.351629415640363	0.642590658110729	0.565298163240636	0.20380414592466	0.424492822713067	0.410551997244287	0.594004970752893	0.209599380685117	0.601060885608856	0.384485374506348	0.436157288951657	0.617826617826618	0.3149587915295	0.477728731942215	0.127051680633306	0.791505578261349	0.492041888775472	0.568642335766423	0.883468393642812	0.348290598290598	0.394745598225426	0.346749815533287	0.287636695975544	0.402512923309013	0.586804711213592	0.341858883832837	0.295051793188593	0.176037954366875	0.800524304396581	0.623595378597753	0.498829822801738	0.566855160294681	0.28768185756788	0.907801418439716	0.464237176451208	0.235838114955176	0.46881214382284	0.423147031423815	0.637493516338826	0.315136896808035	0.397158403869408	0.331550205582058	0.250551776946984	0.518934299017072	0.804664945596922	0.352146541360187	0.399094247869287	0.690775789357179
51.6666666666667	0.461001204197489	0.515179159697938	0.611923593493509	0.613415278122395	0.133516605988558	0.275703162243762	0.421336572504513	1	0.562144377782079	0.527721402214022	0.331170931970816	0.38150547632657	0.688192465970244	0.568420069575774	0.405513026299543	0.101667699726199	0.656660775433558	0.323503837284035	0.586510948905109	0.940008530124809	0.445290242165242	0.480042977956467	0.398840834979649	0.573729160757618	0.431259068229997	0.591894126431487	0.496626392593755	0.283225179921106	0.133110269501328	0.784330124250391	0.58928078862285	0.622455084551901	0.591344312523937	0.254997485351415	0.613195956888367	0.44754236764615	0.316648730557821	0.62795338250646	0.40855965164659	0.580608865658541	0.4199742914804	0.462152357920194	0.494608119163223	0	0.47899637868598	0.822541658378177	0.455938053440542	0.375234712648068	0.678891064320254
52	0.453234912343806	0.641021742435761	0.377182510073123	0.562975970072338	0.205438739876662	0.433656443667566	0.484694657180523	0.943505803395845	0.536365395780918	0.580765682656827	0.372777170396484	0.423860830134365	0.743680188124633	0.236931194695431	0.268101000123472	0.101452953492799	0.644565337457197	0.378738043930286	0.486832116788321	0.989483254018138	0.426237535612536	0.478133231665049	0.495001547140171	0.508650846175665	0.439044194141433	0.682387876950013	0.572781003190544	0.253161793489717	0.169675607839632	0.793743600898594	0.617382260507812	0.715573621449143	0.535246806497398	0.188731950579581	0.805076227173731	0.42281675349546	0.368893478816892	0.600106104427293	0.465611079627558	0.671216534333479	0.370026915591772	0.593455259975816	0.349521370972026	0.0373631818386557	0.398551474392137	0.833870770025787	0.477965794950683	0.517758597643644	0.712212375532885
52.3333333333333	0.600128239213049	0.653083979524607	0.489852260856588	0.487247024093549	0.113356613913862	0.330261136712749	0.494300802627251	0.854341877337886	0.426398296884072	0.583118081180812	0.361933554965528	0.46501408289243	0.599828155383711	0.451308631598608	0.240248796147672	0.0882899855046293	0.736026731470231	0.173036936221693	0.74119708029197	0.911303537757026	0.365473646723647	0.424934146679606	0.466748387403899	0.580284264599288	0.460155148909275	0.542767966722834	0.580574297818924	0.231398114968834	0.27294224545959	0.783114998181062	0.491342784146149	0.680436044977036	0.539211931421362	0.215871977119728	0.571647958898755	0.486805798653296	0.310495760482972	0.618968733421183	0.431896230207743	0.636875074811475	0.485994786295284	0.477478839177751	0.248440869925523	0.107157335255169	0.495018845613776	0.802661761348747	0.610520056362062	0.443197947895384	0.686625295305266
52.6666666666667	0.590281969879424	0.869545385434089	0.351067004924638	0.510303539276875	0.201104589246353	0.402034006038455	0.493857920213827	0.915438622917347	0.221288949100058	0.456226937269373	0.426426292420625	0.459751905449578	0.571338126893682	0.170950946744181	0.237396592171873	0.0639553327834529	0.835662211421628	0.374390382216173	0.31719708029197	0.840346367962647	0.33315527065527	0.284950783307916	0.593304453383476	0.555229901358293	0.3616473557099	0.450397512222893	0.734661854699514	0.397373452979614	0.374084376966704	0.808793912368408	0.65048723688078	0.716277487433059	0.480208169058508	0.15260584246787	0.606299212598425	0.478558779317587	0.350252794574448	0.858699707357144	0.444350801054618	0.631763954833819	0.468680712469056	0.539585852478839	0.367205677677082	0.133991712085041	0.477126598181953	0.804557776340698	0.554920692374317	0.570604747083198	0.767724040806513
53	0.597529049309541	0.727940803811262	0.704745560364124	0.400333377868545	0.24430987938678	0.207373271889401	0.628491583939167	0.855638959321836	0.623030772208245	0.428874538745387	0.40654075280573	0.423862422321186	0.77135621580066	0.402722327286311	0.233643042350908	0.12130721888986	0.729620015464487	0.500737212203697	0.451912408759124	0.868894226452366	0.287437678062678	0.295924026064051	0.593554376026468	0.436261069616464	0.472205370468192	0.395380905109155	0.518646372718239	0.332846517510313	0.45732554285693	0.923383301017481	0.761283320898053	0.640001876975957	0.451438484240882	0.166342489077942	0.525548668118612	0.563716203694171	0.399002012383154	0.949762976400321	0.478551627376806	0.501276782508079	0.678831977671283	0.65903869407497	0.494809982682235	0.272375118237917	0.325504397309881	0.811176578966492	0.548185684553434	0.591335841178306	0.862075743176969
53.3333333333333	0.671957837448978	0.522071866605849	0.805103715863304	0.391000069983904	0.26333060901008	0.354679802955664	0.624244056699309	0.532774332839606	0.411728275595123	0.484409594095941	0.408766371404984	0.512910246836723	0.748971193415638	0.357871635030702	0.313969317199654	0.0690213916532043	0.796421075886447	0.460058220861215	0.300262773722627	0.736772694621532	0.460158475783476	0.29417371412727	0.537143265179825	0.571775235574044	0.478712582378166	0.568066279691832	0.480464459438255	0.232835978198681	0.467547750183404	0.738050322720983	0.887216532139546	0.412752878518597	0.480163110820736	0.190301333672659	0.467247445133188	0.428633939418899	0.310576191464342	0.942246675679838	0.457420512100179	0.557546981606352	0.646086439073562	0.658388754534462	0.294412630281652	0.199878383856583	0.461680585322593	0.824431801082116	0.486691572837623	0.48685927425258	0.965609101699508
53.6666666666667	0.575881644589713	0.56276924636359	0.2103417400388	0.33256351039261	0.125913267454244	0.286932570581069	0.531298318859798	0.829145013765805	0.43781691503774	0.285147601476015	0.440700372609831	0.457134350316129	0.714330936553159	0.369241904228246	0.283210890233362	0.0763959725320046	0.864271512205899	0.556349476390306	0.434394160583941	0.798228876717249	0.253472222222222	0.253836822403993	0.653690524361507	0.485550408118244	0.428135791049527	0.710444029306335	0.323134055128407	0.3110263783914	0.510030424566068	0.888939727496728	0.7642497004228	0.498750637878548	0.31250140806993	0.165627480564493	0.381024180488077	0.498471058213043	0.385254749047295	0.823433676176133	0.449672328862669	0.526581015840083	0.652901102671018	0.598065296251512	0.555427472562498	0.197142020629701	0.640625230951149	0.830974997999752	0.495805163075094	0.535612671618706	1
54	0.766407581752498	0.507070092747453	0.310774511266974	0.313820548546561	0.221499863783837	0.309656231791937	0.532844522373332	0.591151390388204	0.343177859492936	0.308994464944649	0.470470113121667	0.354094388019113	0.696468140912586	0.366626975788564	0.256699901222373	0.0807006583924292	0.491825914061637	0.333219916071226	0.640817518248175	0.753675810361857	0.388532763532763	0.245102592541245	0.578094875395711	0.652264347168384	0.456916536530117	0.716039811299703	0.643391390763115	0.308229696768948	0.514437704118302	0.852317177907208	0.79408758959054	0.48547396575692	0.373397616419222	0.168293614004472	0.429245546434355	0.476360603751828	0.354784276064866	0.616665240531891	0.451527436705948	0.486346407054224	0.732394217065459	0.668984280532044	0.487638515559427	0.177041574703842	0.458554430566847	0.857694642491436	0.427214085344571	0.489134793484695	0.980569963017667
54.3333333333333	0.619489232597782	0.533221833662764	0.388598716609461	0.245382652898924	0.0953017807167446	0.491339583664388	0.604345427562826	0.55921806877045	0.334778401393459	0.354520295202952	0.405319172672304	0.356264538655908	0.361416361416361	0.348252433984731	0.269979318434375	0.0859033739561625	0.596570197724512	0.508865449321386	0.512233576642335	0.720026712759271	0.497907763532764	0.181124358796617	0.673124985123652	0.607103463489963	0.504153220504753	0.877696689162321	0.382446780689366	0.365977596434701	0.535299199725918	0.82144772520149	0.676535757082457	0.481209711004358	0.26133777907946	0.144140868795938	0.304071033673982	0.429776784795008	0.399465294835848	0.606215665805281	0.378487207182771	0.617448030961976	0.565206250516182	0.501617291414752	0.308718379142187	0.111808026665466	0.233441726406031	0.895688345930615	0.499864265677314	0.518710178413438	0.794408378082338
54.6666666666667	0.415129099354112	0.648978764380923	0.751828085360393	0.286552274794979	0.103289001164029	0.556226495047407	0.452820073192146	0.394948911706374	0.257480162570156	0.557518450184502	0.531967469153707	0.442436873773021	0.290779179668069	0.31561252363942	0.0961353253488085	0.0887145973752154	0.510493758974925	0.531359872972666	0.516671532846715	0.690850318757296	0.354567307692307	0.229536947178705	0.539582986218551	0.281239166745454	0.617204782258678	0.899476182166163	0.67785972069669	0.217881447800295	0.489148447304428	0.745352330304269	0.734459291415135	0.448257051857326	0.155180570887873	0.109353886798398	0.361785893784554	0.530892860819966	0.444548468513684	0.549461776735748	0.342847824647909	0.633487611219726	0.455504566756385	0.502055622732769	0.00444630961614082	0.0363609747308678	0.150580149286823	0.872263055013796	0.384102279043913	0.413164276575837	0.707145910379861
55	0.603706426035688	0.626273376919568	0.580584987315325	0.291591115861534	0.133318473388315	0.536363154828115	0.588013167334444	0.373802291232563	0.302148248500097	0.413929889298893	0.421534393895446	0.398516400320348	0.236738570071903	0.28943989166725	0.338325719224596	0.0772598380618177	0.584529990058544	0.488677176666289	0.381722627737227	0.670422914608961	0.16951566951567	0.25965617634826	0.612500892580868	0.360877375437269	0.522779855092856	0.648384060603806	0.436529107170877	0.434833177753019	0.413068412448377	0.814749530263765	0.658576951773723	0.591435124085707	0.298263004933877	0.147425060442457	0.106410900765064	0.643972777629059	0.405061682519613	0.54642582102579	0.486671155091214	0.747452419901847	0.660329890707026	0.684945586457074	0.421884130340087	0.332271068870772	0.144290887591457	0.86051334073731	0.317217575655726	0.534234629901914	0.665862329543503
55.3333333333333	0.67150430852478	0.556434037808525	0.384644082972691	0.232346560291133	0.0743864081036234	0.781979977753059	0.650330089845561	0.442321693068561	0.294600348364621	0.35710332103321	0.391167808295589	0.439066214273318	0.300999412110524	0.18479605892928	0.0974703667119394	0.0460825894491271	0.574947531205125	0.26293901931874	0.561751824817518	0.577236912992727	0.41858084045584	0.231072369333148	0.563385142693928	0.485960102108349	0.594672897843001	0.82680539781261	0.259846226267064	0.419118311301153	0.474852252795745	0.771965091378231	0.552655497524249	0.762835289494214	0.193840538896524	0.158853077869275	0.108951806556095	0.518681918332887	0.467061100199308	0.147599815172933	0.523219524323871	0.673634441208156	0.641376739931006	0.577539298669891	0.519564824750593	0.0994549795054276	0.202032370113074	0.819934362500743	0.444329537081324	0.546150076062811	0.696531141109165
55.6666666666667	0.523997935661448	0.425523288226649	0.654454559021042	0.201954459565209	0.121901082299329	0.562794639546586	0.679777885404823	0.680315316446163	0	0.55890221402214	0.325291728954238	0.425561285659014	0.337403337403338	0.228549415143237	0.22508180022225	0.0737116446145061	0.500358997017563	0.389966352878909	0.317547445255475	0.674311978091047	0.261440527065527	0.154065576043255	0.542939090281579	0.435536226403202	0.560822017028089	0.724719567213752	0.490140697735238	0.412516185371435	0.475442496825343	0.674995030734439	0.510995048497592	0.762577205300111	0.124923964223759	0.173528930577521	0.251912659853689	0.463979778843976	0.436490892799979	0.178703814625297	0.454875995162835	0.631021825000998	0.617984951833585	0.510368802902056	0.332038927785982	0.33345344804288	0.275227255930825	0.850503291784449	0.381969311115995	0.589092147389995	0.673598468801643
56	0.665423893154841	0.672545740205768	0.398000298462915	0.199021497782783	0.119251058771082	0.418507336193654	0.584016865791089	0.36581059255726	0.234023611379911	0.402721402214022	0.378026060376179	0.488224982366531	0.363406141183919	0.234993345941024	0.202222496604519	0.0376977251541048	0.583618689937037	0.70072965105289	0.631883211678832	0.569357771392655	0.351940883190883	0.167094135588521	0.504010663366101	0.512968390532917	0.556937527536279	0.708046654403245	0.292745436476803	0.299218585323256	0.491729135711439	0.668454352139035	0.551660675122657	0.768888536955897	0.178160272151756	0.156229360188568	0.368766404199475	0.622459485616621	0.381394061941507	0.149331713244228	0.473858156097073	0.797789570282888	0.765343052029046	0.400665054413543	0.215276818630941	0.1641817936129	0.245318158303155	0.849143857109616	0.358235195263518	0.453951765357368	0.708699244705496
56.3333333333333	0.71611278795177	0.588262125589175	0.763542754812714	0.261555296827184	0.180251133070808	0.416229673181842	0.697933474399584	0.569134469744517	0.446719566479582	0.448800738007381	0.428785782815324	0.591377989927826	0.543028987473432	0.320655599915949	0.0786624891961972	0.0347937704069929	0.480476085275599	0.667006918452988	0.337109489051095	0.736452814941187	0.275418447293447	0.166165257174546	0.519898602813415	0.55091235700104	0.596670503484276	0.684124400298671	0.528061091061248	0.462954319612153	0.356868615775343	0.593086532727771	0.785036966696059	0.774710095197874	0.195845630477392	0.177994704089485	0.290584687552354	0.472669522064123	0.411381949035713	0.270645012236236	0.546507666648907	0.573139687986275	0.639216716043683	0.520752720677146	0.43682734294487	0.172773748930228	0.437587761436701	0.832099541154096	0.415489225280194	0.563326268084809	0.592469190930359
56.6666666666667	0.741000578640352	0.46140590948254	0.687733174153111	0.260709127809695	0.106347673180276	0.451506965411303	0.675885182086831	0.406513862040687	0.382775304819044	0.553966789667897	0.472182556505053	0.654477945824251	0.456971012526568	0.299806215124559	0.0695039511050749	0.0560390057249393	0.586407820611952	0.392234698121054	0.536934306569343	0.535770404956452	0.364138176638176	0.0582767225842228	0.439709137647871	0.290063344993854	0.548155905508178	0.590781263857141	0.721847376954862	0.378481736878557	0.51513780429221	0.671990969063041	0.613265052341224	0.604242552218058	0.157118075112082	0.189453018487212	0.0901602725191269	0.509956139447728	0.372702690094603	0.36677391200178	0.52798564995778	0.683074651877269	0.623617955304447	0.649758162031439	0.450421257290992	0.160544570064411	0.295905698026753	0.832856332271673	0.413718215546105	0.605504528760654	0.527199571020201
57	0.646313122624838	0.151994323653135	0.787643635278316	0.285088974990298	0	0.296625880608083	0.685934209946984	0.510213474589746	0.199574221017999	0.315129151291513	0.530394475557241	0.627140098110552	0.253742142631032	0.281361630594663	0.153432522533647	0.0535889464256954	0.570280569976804	0.222675891270651	0.177985401459854	0.648637424800215	0.328080484330485	0.0321884098156106	0.203591745412134	0.355677413255176	0.509970727926573	0.448517947412237	0.369632302944715	0.323041193652323	0.4333750414288	0.618236642051613	0.571570688914513	0.677990110682926	0.136661635163449	0.139796283167609	0.391969620818674	0.534480983464778	0.439621266594922	0.305729639073811	0.513561338842148	0.620141244064956	0.695877107346834	0.518455259975816	0.286534640842302	0.196162335029953	0.375981080481856	0.821118362571211	0.379306332975684	0.486798805909349	0.510287500429361
57.3333333333333	0.701502901021222	0.463129086209518	0.251678853902402	0.209754483741467	0.207283849716423	0.515493405371047	0.687495953194322	0.506037707428514	0.222643700406425	0.278136531365314	0.645607889511145	0.635156758753445	0.282458282458283	0	0.175825719224595	0.0410311723680165	0.511046062078869	0.224188121432082	0.376408759124087	0.493557510999371	0.282719017094017	0.0225703590738944	0.368516887630019	0.341338123601525	0.594481441413179	0.562095729068027	0.457973743396621	0.419163479779578	0.496899822368201	0.584723165028372	0.729302041646883	0.505833289341709	0.0707864915403158	0.0512685341719536	0.179315351538505	0.51318905339456	0.486990288763309	0.191939486249209	0.496498867399346	0.604480708614292	0.722754581050661	0.548669891172914	0.292962400263485	0.101436872212963	0.247550070209149	0.807733950119318	0.337422599118373	0.489309833425627	0.552584374296324
57.6666666666667	0.485726350030496	0.57614920683189	0.587673481569914	0.239911184064029	0.119028159595809	0.172837544361459	0.491459621296687	0.502506297123826	0.283955873814593	0.406226937269373	0.639137419398023	0.567522254791288	0.36019536019536	0.136396535219817	0.347687986171132	0.0713201524698257	0.613001215066828	0.269441609012892	0.32519708029197	0.583993669749484	0.0617877492877495	0.0800464439206986	0.172422821507629	0.276669503009675	0.612489879336315	0.603034195491905	0.273445263873633	0.38002122918486	0.528177170031244	0.590828798487843	0.78491261389586	0.449529876178242	0.136188523666839	0.0880975320087499	0.056765510694142	0.56471490641023	0.554545878636083	0.208166618178084	0.481536914062815	0.667230578941069	0.752499380581385	0.471432889963724	0.263856868140625	0.0678910859871176	0.0591826176927055	0.844256645411431	0.366198275527748	0.515839523382154	0.580030112549949
58	0.507939883959151	0.522578683290254	0.546634830622295	0.28401376774251	0.0162840230824479	0.476137507283224	0.460040869499906	0.567611444447234	0.230927036965357	0.593127306273062	0.623150895825431	0.516444901578972	0.195586306697418	0.177161401788424	0.322904062229905	0.0476394996412762	0.406246548105601	0.16003175683339	0.547620437956204	0.577843000808117	0.408876424501424	0.0795577429640926	0.26765524956561	0.396898931644134	0.608951395440569	0.586904840236991	0.293059260421571	0.325261977174862	0.520895011041473	0.602046212294525	0.746080625833729	0.505443230275622	0.0960641629305877	0.0596365575369775	0.139861506673368	0.57457323476721	0.532486877685389	0.272260537709856	0.424286897513768	0.623764114431633	0.797550702325414	0.522143288996373	0.245949449125081	0.249470744561056	0.0830463380385778	0.872006142413261	0.307315433638843	0.43080830262178	0.428128709205891
58.3333333333333	0.743211923119028	0.647204905985505	0.325772272795105	0.27396789647472	0.00937414864898339	0.506276815509296	0.605819112318606	0.586933781872652	0.135629959357461	0.489022140221402	0.639433052946295	0.499050260561373	0.0271333604666935	0.152016063131844	0.373243610322262	0.046404708799227	0.54805037004308	0.155759706627349	0.250335766423358	0.589094908862351	0.336672008547009	0.112605711909053	0.241996524885155	0.233494059437143	0.633010317886875	0.569373678654495	0.368533919138031	0.40432939865699	0.490062673861313	0.581227802384498	0.699498066879197	0.472599083801111	0.174871020794377	0.123805541921919	0.182861450829285	0.653357494388732	0.568412179824371	0.287072373487584	0.485140570029917	0.653313649603	0.781488171751546	0.495193470374849	0.166957066816825	0.302418809963515	0.108765058014929	0.847295554457764	0.324573083237458	0.43337979848129	0.530226092200124
58.6666666666667	0.788142564471483	0.353808727383306	0.338158483808387	0.22928635504743	0.0267479010327661	0.381746914561152	0.706234282206746	0.598005004225977	0.199535513837817	0.154797047970479	0.628053950333564	0.524007788977928	0.118572785239452	0.139431720015877	0.435095382145944	0.059133303724383	0.370374461504473	0.329288117651507	0.457167883211678	0.636857995869623	0.362001424501425	0.0844967419936225	0.203841668055126	0.323658252182408	0.543849289189171	0.510912633135841	0.346775458967519	0.519497726519919	0.602678255558907	0.655560514403369	0.644228899590766	0.580088217869984	0.0714173068691284	0.0735246890015937	0.0275311330764507	0.524272594361963	0.602711167520039	0.467621036058392	0.661517894767434	0.577041854526593	0.866959469904726	0.531393591293833	0.423068750464817	0.418596009188775	0.233360431601508	0.911304227827158	0.486290833408741	0.583178979930875	0.568015624940366
59	0.865289398370424	0.499721250823577	0.290926727354125	0.222109823831428	0.0660648388934295	0.223422850786588	0.739761257889652	0.353768650783689	0.344029417456938	0.194464944649447	0.647844664093353	0.564579893546389	0.241939130828019	0.191706941234153	0.447888628225707	0.043808231613574	0.407406384623881	0.353786246266682	0.25407299270073	0.529204453623058	0.36832264957265	0.0982150284209067	0.134160854973461	0.236235857678611	0.610766771467917	0.541712320733288	0.49913698415189	0.516768797615104	0.637822911895372	0.72007470775093	0.541466006466346	0.63482846199417	0.1551355126501	0.0681681845449092	0.0204110124532308	0.64034347136709	0.621226379431546	0.453676860678042	0.60660089025802	0.568120336751386	0.629960378385361	0.557285368802902	0.578673650436132	0.423787216792036	0.320597147291405	0.85728872058259	0.488023061907778	0.597541802720439	0.533369018040814
59.3333333333333	0.798858358225295	0.323551771324312	0.441799731383376	0.24834742554667	0.0615573222379078	0.349753694581281	0.772573405817559	0.347249767780484	0.43762337913683	0.487407749077491	0.560186528034985	0.625289977024744	0.357165468276579	0.270294879876725	0.38956043956044	0.0698462124133084	0.521512205898597	0.178556576310914	0.3407299270073	0.494219718056927	0.30417556980057	0.0391653958131151	0.183407516721015	0.437647726198355	0.670773368641282	0.580410757862274	0.575919242638214	0.5378812972387	0.659868619499279	0.608905673963674	0.60551222048882	0.515787127464264	0.0860161759073602	0	0.0536661640699167	0.521348557543809	0.662144836894012	0.419673814454161	0.578693545548629	0.51820213063081	0.638109174383811	0.647007255139057	0.5355917257206	0.394193955227242	0.423775035104575	0.862373387965186	0.54914228835141	0.613845977582158	0.569086166164791
59.6666666666667	0.787660885476127	0.458669099386752	0.0776003581554986	0.201121014893847	0.11541223964138	0.28184755548493	0.80727104144706	0.515234437108261	0.438049158118831	0.371494464944649	0.656797340413664	0.572743035376799	0.158232713788269	0.0869930657701197	0.44596863810347	0.0868990155837437	0.269661990500386	0.112169672224112	0.248175182481752	0.41762256442489	0.439325142450142	0.0916990156661583	0.350010710970414	0.365699158551574	0.60928356081279	0.5580276298888	0.626758721690465	0.583652022042217	0.647961330637203	0.464414432997424	0.515946550905514	0.559981112929432	0.14533534593462	0.0798749341040884	0.108225833472943	0.548220867738814	0.635839080126952	0.285277155032259	0.62868135576254	0.573239436619718	0.706348987859395	0.623140870616687	0.575879434357171	0.464134498446016	0.30555760845466	0.859455594859106	0.41517897539977	0.557597688199762	0.584796978821985
60	0.832125486761647	0.645988545942932	0.116997463065214	0.288511824098639	0.141144711097902	0.359235128979288	0.819301385367269	0.540573561285032	0.569034255854461	0.220249077490775	0.609105513286776	0.579637204311005	0.296024962691629	0.187527725245733	0.534845351277936	0.0490695143318708	0.65127582017011	0.199689992816907	0.549430656934306	0.513019664182454	0.263933404558405	0.0714716484125883	0.271225573036917	0.325990356433771	0.610699877052678	0.684627906244904	0.634290496364873	0.638415038092084	0.603989081416436	0.55746908741782	0.593477130389563	0.502393144345317	0.00252326131525016	0.0251828422194349	0.195928966326018	0.621002615159689	0.652422339865937	0.268560573648452	0.649491177339591	0.618605115109924	0.747042143760178	0.564691656590085	0.60545775209035	0.426928967163641	0.513428423619836	0.832657408515258	0.503445066380547	0.715531453086114	0.464646377906777
60.3333333333333	0.906632469543187	0.330241751558462	0.437845097746605	0.20175723220023	0.0551799291675953	0.355474336564436	0.799161890356818	0.618206010092134	0.28852332107606	0.407380073800738	0.691146611927977	0.495655718259358	0.266404377515488	0.153183441899559	0.353787504630201	0.0606755721278911	0.317325748370706	0.4002117122226	0.239182481751824	0.375740773996588	0.284366096866096	0.0886108415361153	0.353676243067622	0.253789669408465	0.561668577386458	0.774148974821842	0.27747267116481	0.657118552199705	0.705939307273222	0.576011011142406	0.468285514029257	0.610225413081349	0.0555793362921576	0.0903334484618229	0.0375272239906184	0.601805901612339	0.604004497700478	0.281647356801807	0.744526301683482	0.593456489646092	0.769978632704879	0.62827992744861	0.532191919084602	0.46082383676411	0.331594117212327	0.839157297308804	0.410046925294414	0.661479119326319	0.496568924917085
60.6666666666667	0.776776191295373	0.473772236582028	0.538203253245784	0.20281971510189	0.123622359263937	0.320991577943747	0.874845573895319	0.659210537326672	0.255041610218696	0.469188191881919	0.607359601954528	0.521613139999395	0.422737756071089	0.324181083794448	0.412892023706631	0.0496454246850795	0.649922677565448	0.233866394465237	0.231532846715329	0.449430950884439	0.257211538461538	0.041446000277277	0.176373979482541	0	0.552824674351066	0.711079133397607	0.26654113708876	0.765082507753922	0.694242420857027	0.635578441263281	0.528580795405729	0.563174904831453	0.0376010994210019	0.0389255482236886	0.0732115932316971	0.568354508576488	0.651616421432604	0.332038402957233	0.625221393962585	0.570929258269162	0.724082360440221	0.512590689238211	0.549047522922134	0.362078284761947	0.288973468331978	0.887406951761356	0.554752640355753	0.703536443315702	0.469139406985043
61	0.945610934738752	0.559221529572754	0.438292792120579	0.205332773462104	0.0356514847561729	0.231738969225064	0.898743094530791	0.584548824676357	0.250203212695955	0.387915129151291	0.721145050090363	0.523423456414682	0.224935558268892	0.265695407531928	0.375347265094456	0.0546138716305584	0.440599801170882	0.272125817549431	0.515094890510949	0.595357816288049	0.392539173789174	0.0647407458755025	0.226382310237307	0.353597428382339	0.618872529231706	0.78446226423191	0.208379099325279	0.576673492125629	0.788843456856327	0.587798484092725	0.449474326799159	0.520523558981037	0.155743798860027	0.0310786327582969	0.115178421846205	0.633187817886045	0.614114672058759	0.404882515017199	0.687392532101116	0.657546981606352	0.729848777151183	0.509915356711004	0.470522614026327	0.47358227106887	0.427218978641638	0.903836879583596	0.468826350556511	0.660177458674661	0.502014182285882
61.3333333333333	0.796856575387455	0.863260858547464	0.57774958961349	0.177021103328053	0.0996730812095996	0.285131627734519	1	0.489468531117415	0.437158892974647	0.316328413284133	0.662537093643321	0.60218575406764	0.297788631121965	0.215684901123018	0.420050314853686	0.050943663277906	0.450044184248316	0.215039128955427	0.594569343065693	0.458404417706743	0.229611823361823	0.00221128517953687	0.311475019636779	0.149191642242602	0.662280084609902	0.749640250723074	0.376379517757205	0.685905929115601	0.854464814380355	0.660781056034564	0.449096746478555	0.461348959158176	0.237997611913398	0.113668175455818	0.201373764449657	0.612390091221712	0.572025139507537	0.489511063953588	0.722675101029916	0.540645573155648	0.839942229949366	0.613588270858525	0.604177512403982	0.484584027746497	0.435148917301012	0.836637351715552	0.485411792080872	0.769851120573877	0.455938927626833
61.6666666666667	0.894962701155717	0.311692260909229	0.518952395164901	0.201248258355124	0.0837234068900611	0.326129561947136	0.898989140316026	0.54659871630725	0.267853686858912	0.323523985239853	0.71061380218211	0.535915754210936	0.548455659566771	0.252433984730686	0.296241819977775	0.0575959159170885	0.509444383077433	0.361914483384371	0.373839416058393	0.408643485678369	0.388265669515669	0.0571676140302231	0.314176564396734	0.186536825186726	0.613472535229136	0.817015640153455	0.135781160102516	0.691860640187901	0.772884524434613	0.692175563214684	0.494759094711615	0.470716242294134	0.1421136819339	0.134888173880376	0.0906070251856817	0.615798035541461	0.628299479933274	0.544426950524532	0.661558258297531	0.611846147707777	0.770635110552987	0.565084643288996	0.561961475941056	0.51887302373767	0.478116916709778	0.808046649455969	0.530488514290885	0.687716015199832	0.456872073186091
62	0.90651361368719	0.348284425523288	0.0582002686166245	0.116815859625013	0.0815687148624215	0.213782509666825	0.894658734495878	0.537042150980343	0.152699825817689	0.465083025830258	0.761853231888262	0.610275655304291	0.322932211821101	0.234106138077561	0.39390511174219	0.0557852147218304	0.416629846459737	0.36682923140902	0.126890510948905	0.494668671994253	0.265491452991453	0.0638915846388464	0.265251231761597	0.266364123412436	0.624254069602486	0.810072407588063	0.270568544379936	0.72533801078021	0.689222553652624	0.722591218838955	0.285145492776233	0.524764351534135	0.189514948070381	0.126998842655711	0.0999050650583567	0.62241315404732	0.47242262941747	0.648845686512758	0.70962799356121	0.605881179427842	0.661045663328512	0.694860943168078	0.652422893447935	0.495281744065583	0.522126967703791	0.795198083285193	0.5888672001241	0.698005181182252	0.418582572886492
62.3333333333333	0.884134307117277	0.461659317824743	0.885539471720638	0.16971096647771	0.120662753547812	0.438423645320197	0.952013302012137	0.448991204947322	0.24044900329011	0.37089483394834	0.802276936120841	0.588430852122465	0.202686202686203	0.258084097966426	0.416835411779232	0.0816133298843787	0.486744725505357	0.255037616725265	0.349138686131386	0.465424934901679	0.455083689458689	0.126407181477887	0.237997762597291	0.202672465412373	0.578276845997522	0.813393830335661	0.33422250117684	0.615435574693607	0.743528728312721	0.538732143459884	0.235020009496032	0.497521805181627	0.131998107554014	0.111335308695837	0.061735634109566	0.578645264913617	0.463689433460253	0.76104769565143	0.689993557980596	0.727785979332084	0.617999775526929	0.685278113663845	0.527262199462406	0.584444394396649	0.481361318453921	0.757691045715028	0.434323978437633	0.600590680237036	0.398613448745692
62.6666666666667	0.862296107470716	0.636004257260149	0.166318459931353	0.201776318719422	0.147336354855487	0.102441866624291	0.915404279124699	0.57111774993933	0.179485194503581	0.247324723247233	0.796838394430933	0.597095532801437	0.306426084203862	0.271555648945857	0.380327818249167	0.0671277203223147	0.591268087926654	0.31015840610941	0.138160583941606	0.380241537218281	0.146812678062678	0.148630944128657	0.175231475971723	0.190381645709243	0.58702617416999	0.876452228442936	0.46226267064177	0.748814327441356	0.843492233729188	0.716560593161541	0.478120690044993	0.573383894373178	0.10221461238651	0.112589603291463	0.151002401295583	0.589018388485061	0.584525722632152	0.778305067342084	0.707144829189613	0.668164226150102	0.597466842574494	0.661562877871826	0.643641830370897	0.478278005495247	0.66394944941246	0.749785477978553	0.45844590664064	0.680262496260511	0.438651881366476
63	0.809627324335736	0.709948811514875	0.380316370690941	0.159830511709579	0.153156499987617	0.347952751734731	0.840119448753843	0.68090946367752	0.361989549061351	0.328551660516605	0.746926526696267	0.620570735287796	0.225659114548004	0.225210711867573	0.531264662303988	0.0592455574372965	0.51474649287529	0.308230312653586	0.20356204379562	0.372889916494568	0.502938034188034	0.0658949119645083	0.153619117892081	0.21991112791907	0.658734680602234	0.775290445688587	0.579685129975418	0.739742991357764	0.879377953547608	0.768319713170242	0.591880892627009	0.559297776370046	0.175682069074279	0.13651209152109	0.0674317306081422	0.629342297634001	0.57742366697713	0.84842982561224	0.707504871878083	0.530874197023501	0.604825747484737	0.646886336154776	0.756626966841261	0.638158191072474	0.568221121868302	0.772659507858222	0.411817935028504	0.635156294754531	0.385277481995443
63.3333333333333	0.873140140437578	0.441285287111652	0.524623190568571	0.198976962571336	0.189303316244397	0.343715239154616	0.923943362850194	0.548598733043791	0.151848267853686	0.498985239852399	0.646243780539503	0.591584974214534	0.344005788450233	0.269921318671056	0.352659278923324	0.0484789621900212	0.439633270738981	0.23152243771502	0.256408759124087	0.433251773368052	0.207264957264958	0.0669277693054208	0.0871158926998785	0.402981311651067	0.62429328357004	0.870352940503334	0.30875045765992	0.753858140865428	0.79032372185169	0.762086566481273	0.826349227882159	0.582677858135811	0.149345529096357	0.158398623305642	0.114061540179818	0.63248254844223	0.636805860523026	0.789887563534304	0.705943610533913	0.479391932330528	0.647827164206286	0.655033252720677	0.795512255240483	0.59340795459664	0.676542753676742	0.770121945400934	0.511162532156107	0.692241593309019	0.472278516279478
63.6666666666667	0.850710789296717	0.439714155389996	0.159229965676765	0.184802040985119	0.0896054684597666	0.606017267863764	0.837946475976867	0.669177147925924	0.180336752467583	0.501937269372694	0.669080077645641	0.552184719146206	0.16890516890517	0.201162709252644	0.367673478207186	0.0742826743715012	0.588064729923783	0.263846357415599	0.273518248175182	0.453241447427494	0.475382834757835	0.0749549424649937	0.0430581010639563	0.183826541867574	0.648737425579963	0.807766579220653	0.247293268476384	0.734770694691198	0.8052660194464	0.631220489125747	0.780207556128332	0.522899106676755	0.20629914164057	0.169354007986282	0	0.667581286164364	0.587150989864088	0.755608988071809	0.700268498202208	0.416638072058413	0.550613383253885	0.507542321644498	0.61024404237009	0.518636547903247	0.556913753602838	0.778536934122471	0.35875227839756	0.608413374324505	0.361610124533904
64	0.966873621819433	0.260047640768334	0.32808536039397	0.217319107514363	0.112068752012284	0.248159330473012	0.936193852999298	0.61266621478004	0.262008902651442	0.280535055350554	0.65896717909815	0.611187978352628	0.351015239904129	0.287361957460718	0.384104519076429	0.0817402253859331	0.450568872197062	0.444066386904087	0.527240875912409	0.56926798060519	0.27025462962963	0.0317586302509359	0	0.342125996659418	0.629028946828167	0.696614780760351	0.482975050996391	0.772595531331868	0.720226191939166	0.700032628385195	0.716405525786249	0.575099567708975	0.155473449433393	0.248568468124557	0.237393198190652	0.722859996293474	0.657299674576249	0.558013451303202	0.680559793726216	0.29074731676176	0.528039015960882	0.654851874244257	0.77294603869405	0.591302193594883	0.548488655679551	0.777595165932508	0.450030378634125	0.699991088875734	0.325250842502586
64.3333333333333	0.927923306695026	0.571790583346004	0.51790777495896	0.259264914524205	0.159372910320232	0.304359341066794	0.911177471529913	0.657361149465686	0.183975227404683	0.42970479704797	0.63754211383565	0.638823565001823	0.220413331524442	0.183628680161565	0.399981479194962	0.0528373346087958	0.616646415552855	0.42244149559563	0.463299270072993	0.481093427314357	0.12170584045584	0.0566442534313045	0.0758336705305499	0.194005861775551	0.689718328377764	0.749062363216602	0.455776975783252	0.67151976873739	0.819817303646107	0.749050213959699	0.899981912319971	0.543399203458328	0.176042534976457	0.259069398241564	0.0507622717373094	0.645877519922575	0.587903823849716	0.593026200948094	0.726750203028557	0.373207517057016	0.624831380488208	0.657859733978235	0.791241248154011	0.659970271609387	0.490665878353411	0.78746648208108	0.498183745491682	0.695993813133724	0.33550781056191
64.6666666666667	0.844630373926779	0.615326136536415	0.232726458737502	0.229184560278409	0.103908165539788	0.271518618570899	0.851517843499341	0.701018418564172	0.29254886781498	0.426153136531365	0.682852138601932	0.585389775294674	0.213222991000769	0.150848684364129	0.151483207803432	0.0554435729868761	0.745774881254833	0.386866281047976	0.14919708029197	0.370734937595403	0.30386396011396	0.122611950644669	0.0945183633637208	0.0765182313825596	0.628897464701662	0.592068637015125	0.370103038861866	0.762097624138035	0.813145870339958	0.743945934390693	0.747233715435574	0.535093584848112	0.191790389077883	0.261687056528088	0.0181772491204556	0.627252229063279	0.644731529427283	0.648212482672462	0.718604842654887	0.378745561185812	0.494387114398677	0.694014510278114	0.83026996589569	0.542599432457997	0.57228586209445	0.854403225060576	0.505345346898148	0.640149706887663	0.398206986569574
65	0.911846488278623	0.710759718209924	0.541859423966572	0.250809586522373	0.0773583971072642	0.288945389056623	0.834455215782154	0.384948828023666	0.297155022256629	0.41969557195572	0.673319351168032	0.562045132127624	0.277890833446389	0.183441899558731	0.292597851586615	0.0881435676182202	0.500441842483155	0.422743941627916	0.288233576642335	0.315962557241627	0.377938034188034	0.153677388049355	0.119867660009997	0.242381267530176	0.566840207695626	0.650910172822694	0.407343480307548	0.706988316420247	0.863960853973255	0.562989660177243	0.717477220827963	0.472332201282209	0.181607227341339	0.299673398653603	0.115262187971184	0.670211889710273	0.623539574455764	0.537636267177793	0.665747992721648	0.387567330327575	0.420438061315031	0.616807738814994	0.423854955749392	0.501846763659294	0.446714950853595	0.872424542934133	0.467016559587368	0.547190768075261	0.438473457829072
65.3333333333333	0.930528752169901	0.522629364958694	0.289882107148186	0.220124825835512	0.0927508234886198	0.324911277080353	0.863263292299803	0.655930175147909	0.308960712212116	0.270110701107011	0.643666748477208	0.571797276405224	0.402704291593181	0.176157456048189	0.245556550191382	0.105762519949437	0.484314591848006	0.373369626857208	0.24934306569343	0.389821091855975	0.181668447293447	0.155212810203799	0.0527931830623852	0.106835586650279	0.679859475593919	0.691616912078135	0.22642397614938	0.783029449847933	0.867867263986176	0.649826169465082	0.558545298333673	0.466648483462082	0.141144929821795	0.313646361636764	0.141788127547886	0.650206947676214	0.620452633390761	0.614837506203686	0.658027256684604	0.315201691736823	0.436864831211075	0.834431680773882	0.681177820511458	0.585480383766497	0.572611041312542	0.818180750493089	0.608942952803237	0.628975793567441	0.411220455161306
65.6666666666667	0.881288022144723	0.496072170695859	0.303238322638412	0.243155892326583	0.143324169700572	0.250966682557339	0.868681479486256	0.499953974510247	0.220514805496419	0.406918819188192	0.658565563711819	0.617860833318738	0.260344593677927	0.189162055520534	0.331763180639585	0.100506117827354	0.628134320114879	0.367471929227628	0.208700729927007	0.488950121217563	0.128783831908831	0.133165811728823	0.106026706019565	0.217673568434654	0.690073560789723	0.593690727194185	0.518280244782677	0.784930289981631	0.864651644304424	0.78164859604184	0.602423749123878	0.489031421750632	0.312884403090995	0.326655880945023	0.0687440665661474	0.669717686304388	0.673072190023019	0.678594287474544	0.685114414462414	0.391361768343774	0.399316415969777	0.734522370012092	0.692418431201725	0.653022386378992	0.596585618210036	0.878387117374559	0.426761637602286	0.718497584448815	0.418273432639867
66	0.886023489670488	0.388931123612589	0.447022832413073	0.231678532119431	0.161230403447507	0.030298214947825	0.843789415887306	0.485895279458406	0.357770466421521	0.197509225092251	0.681842522144626	0.646037763487017	0.147831592276037	0.210758562723261	0.428097604642548	0.0499040962844021	0.524494642659892	0.40637405013043	0.272759124087591	0.370398222142408	0.238603988603989	0.102512824067656	0.174493609120986	0.170149065582553	0.669500068047767	0.607528558227888	0.527956483079659	0.756139149025866	0.875028395020351	0.896440505702467	0.419145809310633	0.355959691941321	0.0501498186405929	0.274654160077075	0.00153571229128293	0.648482383707761	0.635097506478715	0.477528109116424	0.617137386154663	0.348896780114112	0.455695157099384	0.742835550181379	0.545642404088268	0.615906941128778	0.805417190155938	0.878118460197999	0.507542950217821	0.699876517278034	0.475704820679574
66.3333333333333	0.884953786966517	0.621154528407075	0.17378003283092	0.161879131436133	0.108539515070461	0.367180465067005	0.899084968674487	0.395283642540942	0.205960905748016	0.562038745387454	0.63205337022245	0.629361198725614	0.384434495545607	0.230347178445519	0.342039140634646	0.0838876877199318	0.790842814536617	0.261767040943632	0.128116788321167	0.20329756666966	0.354255698005698	0.123655205878275	0.231797300835456	0.158929753238158	0.684924997520293	0.791971940986814	0.400334745541085	0.715084766177843	0.881349778239546	0.677241513807058	0.61935607859097	0.370849390276091	0.183927726586613	0.344470499839426	0.189311442452672	0.671776867162243	0.628204571375257	0.380078038094912	0.701513309470414	0.380916091449548	0.33284273967265	0.585399032648126	0.396183717051093	0.659576145218683	0.475766757815387	0.879363385256594	0.506987085848727	0.604304709529174	0.553080525309426
66.6666666666667	0.839669705831757	0.240991333434697	0.203029398597223	0.175793203926733	0.1204893875226	0.406059642989565	0.833530601620794	0.349258152787889	0.481362492742404	0.197324723247233	0.707780182511881	0.619534221667434	0.156107267218378	0.176344236651024	0.379656439066551	0.088865895857838	0.720396553628631	0.35049714566557	0.251270072992701	0.212697539732424	0.422542735042735	0.170376403715514	0.222776283531288	0.110491317638902	0.70221605050759	0.732707002451731	0.368743135101208	0.748964889036104	0.893569877817624	0.763519215118569	0.547439462795903	0.447151395707591	0.153175479307004	0.338308095956566	0.0729602948567599	0.587298972468752	0.631555326059155	0.577896051888488	0.644760571612168	0.46893029565495	0.472437459896615	0.807270253929867	0.631657511979006	0.805346606008738	0.541630330352524	0.807468963122765	0.570368551003788	0.737023175288179	0.457403527252048
67	0.866083855934192	0.622269525112767	0.655424563497986	0.141851010631191	0.247108502365208	0.616981831664812	0.888668167114297	0.436254696692023	0.521230888329785	0.202905904059041	0.742821124969321	0.612160804500157	0.198163975941754	0.285284023254185	0.319446845289542	0.0919845968383498	0.895145255716337	0.310234017617481	0.43036496350365	0.260387671724881	0.111289173789174	0.152356855677249	0.26575107704758	0.277583435756831	0.705766067923205	0.789465854572606	0.28317380616141	0.744907254057635	0.878188155645675	0.687502578392508	0.27335006443736	0.487846580677706	0.23968729582986	0.356304496676422	0.233791254816552	0.640621460782901	0.660389832880507	0.582665617031472	0.699301388021073	0.516658021785102	0.544222253751983	0.827962515114873	0.63388863508388	0.650804017837034	0.594250240189195	0.833978673318012	0.448815233269129	0.751736077959607	0.484423720598282
67.3333333333333	0.899379134541701	0.802949673103239	0.40464109834353	0.222027115581598	0.167322980904971	0.137719158853752	0.857821795512643	0.431878091030051	0.479775498354945	0.193726937269373	0.705420692117182	0.529687119367838	0.354813910369466	0.136373187644463	0.347135448820842	0.0975826406953873	0.846597812879708	0.401119050319458	0.258043795620437	0.223708135045344	0.386796652421653	0.0821398863163731	0.216004570014043	0.0514008382969336	0.692652455832386	0.717433035139565	0.397405722056593	0.851433346382005	0.790225037518666	0.717040642966708	0.394230030070768	0.390751200971335	0.148083898438732	0.401695418492059	0.0822862567710952	0.728774993307662	0.609063606428687	0.667675799633768	0.740071782501925	0.505202888720424	0.504748876046394	0.788285973397824	0.622308043730013	0.64897977568578	0.587946197620279	0.846249553155584	0.526222578435048	0.786104374725506	0.555339920692169
67.6666666666667	0.878160236460598	0.411484466068623	0.401805700641695	0.185953594309672	0.181340862372143	0.206154987022617	0.856171993773747	0.41822107297969	0.0991677956260886	0.136577490774908	0.672131238983467	0.569049161952467	0.164428164428164	0.293759193107796	0.409041239659218	0.103356386016116	0.731525461173091	0.551472534119693	0.107328467153284	0.444475621801203	0.327768874643874	0.0825731318452792	0.360269440411301	0.0951120355488324	0.652501966465138	0.666710532715012	0.446466865421832	0.76035863771869	0.774491403291216	0.603621375717731	0.386061181577698	0.407564799662144	0.136098407191295	0.440245284276478	0.102082984307812	0.702746947264378	0.591175756171871	0.715419369192066	0.740837075032573	0.517483940470015	0.482593807507989	0.734749093107618	0.637458432051677	0.719595964145759	0.616155494789742	0.906439037209019	0.462078415657277	0.650384769615612	0.525567043359782
68	0.829419952144879	0.574628756778673	0.35017161617669	0.211325940488233	0.228050622879362	0	0.843175596402034	0.457016376706082	0.36539578091736	0.42859778597786	0.681150851201499	0.519430251868033	0.086917198028309	0.32695944526161	0.426240893937523	0.0795537182822254	0.72304760852756	0.330573513288722	0.480116788321168	0.532549160456137	0.256454772079772	0.0671461250519894	0.318484754718777	0.303583246667297	0.657978081698842	0.643775264698225	0.408441864114232	0.80723222620374	0.86269285339232	0.80436470283792	0.413233398901174	0.399625777918551	0.11318629328407	0.472287360709676	0.159127715418551	0.681825669748574	0.649660339965672	0.687572091112898	0.80607907054092	0.469688385269121	0.56593896450149	0.797793228536881	0.83170957151812	0.697423539480203	0.54021136649176	0.915368585167628	0.486614010367517	0.788507195732845	0.539791311250797
68.3333333333333	0.891578437045494	0.303329785616543	0.848455454409789	0.257553489970034	0.116068553879684	0.49727210127655	0.812875705439166	0.609494640122512	0.171898587187924	0.288191881918819	0.65391909681162	0.557270163851946	0.492063492063492	0.25511895589643	0.324158846771206	0.0497967231677022	0.722799072130786	0.359532720880118	0.408467153284672	0.339678548980875	0.230546652421653	0.100585747955081	0.355818437150406	0.43238473417163	0.687270915461606	0.567831691694155	0.414456823055599	0.88588560330031	0.825094122510082	0.647512179388612	0.529308824526894	0.42432560840416	0.113524230067362	0.470027206679876	0.214915954654604	0.782123221382534	0.600460708661291	0.572060308387384	0.740179956762587	0.509719506842756	0.523879911142547	0.696387545344619	0.800277296728749	0.58849826584388	0.587665361022836	0.915382531851657	0.460656437038665	0.734531243038184	0.553820935282825
68.6666666666667	0.849246985596547	0.466524757995033	0.453514400835695	0.211446821776446	0.180944597171657	0.326765188834154	0.816789128402231	0.418949112544875	0.207315657054384	0.315129151291513	0.644503447198733	0.520557520137183	0.364988920544476	0.278933482757816	0.30363625138906	0.0627400643262581	0.841682315254612	0.332652829760689	0.267211678832116	0.321686719942534	0.109152421652422	0.115846388465271	0.335360483659819	0.579181242318237	0.688853314387605	0.658900468889912	0.3222448872849	0.814598452226806	0.89022205836899	0.830538668386845	0.682531823012051	0.47412999231613	0.23288350192624	0.419667581635188	0.13343943709164	0.71009822292692	0.646391624882772	0.490469426522684	0.729152640339958	0.531584407293619	0.567171448719551	0.77601269649335	0.879917767176992	0.622145398855907	0.683268051141823	0.83429944705068	0.508447845702393	0.777444671465944	0.533160062133373
69	1	0.759211393239066	0.721235636472168	0.247450359144669	0.215209153726131	0.333863022405848	0.846563258371384	0.497677804835187	0.268434294561641	0.472047970479705	0.607465583792588	0.591616817950951	0.372541039207706	0.351684527561813	0.308695517965181	0.0705343764794307	0.829918259140617	0.23473592680806	0.292321167883212	0.335969067073718	0.226851851851852	0.11345833910994	0.342739152167186	0.260218713560871	0.643925641090702	0.727400164211598	0.324912390815419	0.711121232196091	0.879776414816801	0.689280262827269	0.687829252300527	0.406966513575815	0.181562169103567	0.436300618664146	0.149829675545876	0.805510367975619	0.663349692994944	0.545157701983468	0.828682647395503	0.453193951242868	0.504653580874894	0.6828446191052	0.650335199685518	0.669012657087518	0.60852117360136	0.836467055363197	0.433328593404605	0.630808939130656	0.521570165294618
69.3333333333333	0.934820074128521	0.706046323044955	0.412848828533055	0.295713804006897	0.221933278846868	0.229302399491497	0.835814942490035	0.480983104461125	0.249970969614864	0.337269372693727	0.745849974341239	0.537756322175819	0.460227015782572	0.268263640820901	0.363879799975305	0.0806420912378656	0.839970175632387	0.455861782163245	0.472467153284671	0.434525680165215	0.244391025641026	0.138787605711909	0.281258181991288	0.206674860546469	0.605924999826997	0.73272702825641	0.39306449082065	0.818592098527507	0.832093262280613	0.724695187125664	0.508114585452983	0.473185638787708	0.213711221754117	0.417910357322475	0.122493996761043	0.678263286864485	0.678250336603657	0.466002087861311	0.803673404147111	0.407130032318557	0.528972908641578	0.77046553808948	0.691228498879126	0.605051574253412	0.822710812209001	0.866299746537369	0.562547668601419	0.756576727962472	0.55133636367106
69.6666666666667	0.808532599346293	0.495463990674573	0.387852559319504	0.165550105293964	0.216534165490254	0.0899941734202015	0.850906613969703	0.682022443702458	0.324985484807432	0.388376383763838	0.635032017671077	0.556856195278529	0.340885451996564	0.217179145945694	0.28702617607112	0.0909547910372731	0.586407820611952	0.416468186457979	0.182248175182482	0.320805647840532	0.324207621082621	0.0983016775266878	0.335800823554614	0.264095049005704	0.563027226027002	0.820374253681172	0.569538155761284	0.78934174470776	0.895485843453132	0.70401179122334	0.609581948495331	0.415363048208954	0.209993917137901	0.406694418692019	0.292958061093427	0.788321355764677	0.633911953813313	0.445250115516917	0.80958262495338	0.307560946415035	0.532860951638759	0.722883917775091	0.681300001062439	0.675217332552587	0.713613184539206	0.859875463451981	0.600113758289489	0.726616255163678	0.488291790227352
70	0.903639178643479	0.533982058689372	0.119832860767049	0.113183058805566	0.203147831686356	0.44991789819376	0.877072935740611	0.647160227282237	0.38892974646797	0.338514760147601	0.768000178495727	0.588542305199923	0.499932166598833	0.301697368728258	0.303063649833313	0.0922042236679632	0.562631171987187	0.366526785376734	0.314102189781022	0.433947651970908	0.086983618233618	0.124760848468044	0.295694189893604	0.146355299234188	0.598229835370538	0.876420759321297	0.13792562372509	0.702415007979764	0.925426297698979	0.677710312444916	0.79806914015691	0.367664396698868	0.095951517336157	0.455024146685814	0.113698553638242	0.662227415933941	0.665704712129475	0.488064963291291	0.686908169739946	0.395662929417867	0.447658597636256	0.718938935912938	0.867115370313314	0.667841538669429	0.862323553322001	0.837938063510263	0.584627118424965	0.752452150445238	0.562421522267639
70.3333333333333	0.872552116728962	0.287263696720896	0.379943292045963	0.193130125525675	0.268345840453724	0.340801949255786	0.836656678071105	0.498598314630248	0.195122895297078	0.354474169741697	0.861637921417256	0.55855824299	0.462714240492018	0.314398449720997	0.356675206815657	0.0919699550497088	0.710096100740086	0.483270953839174	0.439124087591241	0.221996498159289	0.333110754985755	0.162661167336753	0.303965439268798	0.186347735652832	0.600822570637043	0.711030499300527	0.663005387311052	0.665199945797826	0.874858955882517	0.714891670010764	0.623287888037261	0.315390616293324	0.160880437966071	0.53492331836663	0.241134751773049	0.670850235776208	0.664218347593746	0.496690226413157	0.783751580232203	0.390104935562383	0.473189232916223	0.701768440145103	0.621633394600682	0.537385703346696	0.843677481339147	0.861523374275415	0.468024871698748	0.659283163703718	0.34658533606598
70.6666666666667	0.924964421437843	0.41031878769449	0.616176690046261	0.164118616354602	0.270351933031181	0.259388738810318	0.813440315767391	0.583502790818334	0.298896845364815	0.22200184501845	0.739340458287779	0.59075385269406	0.321078098855876	0.2519670332236	0.529363192986789	0.0719107046116754	0.798685518612615	0.434161279346716	0.255357664233576	0.254871150219988	0.181668447293447	0.170293220573964	0.253719086949277	0.424442973748069	0.585538350106916	0.78367553619092	0.406872744390397	0.779016983347887	0.84706907530918	0.797689010234812	0.766413439146261	0.317211869526709	0.23745691306013	0.558615549617349	0.197771821075557	0.700492144225027	0.74524130098721	0.776056338028169	0.737365811444191	0.509404301161074	0.5313997590091	0.830516928657799	0.768690968201184	0.5808296923562	0.755583474983372	0.848931720705174	0.589991855940639	0.761169139503651	0.460633279520031
71	0.906723175328027	0.650195124423496	0.507834651544545	0.20924550989636	0.173588924387646	0.364637957518936	0.907098291406269	0.493142202026795	0.469595509967099	0.333625461254613	0.72834623708695	0.607481367433729	0.404603626825849	0.381942985220985	0.568585627855291	0.0941467009609895	0.72724511211753	0.535934369210994	0.162160583941606	0.148278261650355	0.279024216524217	0.186465409676972	0.340394639754362	0.266710787557909	0.584488799798855	0.754291959067255	0.461425806789058	0.810905929115601	0.877637012955577	0.688095139870762	0.849720771439553	0.339905681958155	0.274855250411156	0.574194252058679	0.142179036131122	0.729835471449457	0.708902583603983	0.746648298050759	0.735218471643005	0.475286278577983	0.524360622341	0.790069528415962	0.696965672577372	0.722850322057565	0.782322075234646	0.785819305293648	0.47412645268043	0.854236284824992	0.44014224267891
71.3333333333333	0.747997435215739	0.554204044397141	0.311371437098941	0.2437157635562	0.154592961339376	0.338418348429472	0.804727705014413	0.533527477217383	0.525101606347978	0.285885608856089	0.654086436555925	0.616741525983693	0.393343282232171	0.286498097172609	0.47033121373009	0.10803687778499	0.909698442505247	0.543873577558504	0.263007299270072	0.187494388075784	0.276219729344729	0.152509358103424	0.205722038416681	0.322429170212095	0.612049298877327	0.820382836168892	0.350018306396778	0.775512662230118	0.941763209735861	0.735432551127179	0.689595062063352	0.336576982409216	0.300403271228062	0.600649567056286	0.092170659518624	0.703400737186747	0.716036811651554	0.684556671743706	0.723752000012917	0.429876710689063	0.469692958957428	0.704746070133011	0.695079842333967	0.61369983334084	0.876941837262582	0.794365686459458	0.526196724278346	0.836601806412191	0.475203898983654
71.6666666666667	0.829701452856451	0.427449191627388	0.827786897477988	0.201534556142996	0.230898779007851	0.323587054399067	0.850756396542927	0.367643243876518	0.293090768337526	0.337038745387454	0.713162944287021	0.591696427291993	0.526432415321304	0.315495785762649	0.411734473391777	0.0976412078499509	1	0.46697667384976	0.425459854014599	0.214706608601958	0	0.18620892832386	0.26163330397734	0.269452585799376	0.671855212804975	0.797882414196579	0.31330090485904	0.72948221867566	0.95846320563953	0.634157043793294	0.726516538922426	0.33279956829553	0.244891522292563	0.685032690431611	0.199084157033562	0.84936577229578	0.826891616035363	0.577502438690466	0.739417893314346	0.476199976060328	0.554628486479733	0.656665659008464	0.603492238878913	0.782059366695193	0.756219052546006	0.849821372339028	0.492793153819305	0.653481385297918	0.391180724914796
72	0.809283267910483	0.386244995185241	0.26637815251455	0.190337131550652	0.224372786487357	0.0775464802161124	0.833986433812389	0.447292445961891	0.399032320495452	0.371356088560886	0.725423369553091	0.612869327635427	0.269479491701714	0.347855525203708	0.414265650080257	0.0807348225659247	0.773196730365625	0.419114589240482	0.232058394160584	0.238153227978809	0.178374287749287	0.143050741716345	0.237414609763644	0.190098011408402	0.613929262615941	0.902225439065768	0.460902766881113	0.793053088018308	0.802770981592579	0.611995994584438	0.722324719075719	0.359810425428332	0.122152882600761	0.623299582507741	0.231026972692243	0.710314436916994	0.704599526100657	0.652816045727585	0.673790022458268	0.481370945218051	0.498472100750291	0.768032043530835	0.717746990639907	0.688809062654835	0.929901707190895	0.886008613178442	0.470028568843156	0.75963197056783	0.25114496387639
72.3333333333333	0.776788702438109	0.547666109168314	0.512162363826294	0.20235527646823	0.15050647645937	0.369352190264314	0.877407040017405	0.355249834726651	0.399767756918908	0.252075645756458	0.802762221379326	0.557782848008254	0.429521096187762	0.260091989446896	0.496717187307075	0.0437887092287194	0.722081078095659	0.451249480170882	0.200934306569343	0.254714016341923	0.24764066951567	0.161746152779703	0.179527765215528	0.260691437395607	0.62742348086243	0.896349295806883	0.301637114911868	0.832315787888825	0.847387471930824	0.573562007058232	0.632967057812747	0.390927167467314	0.0800459594025277	0.567480443305278	0.119785558720054	0.826045549080575	0.732993271144098	0.620644156555371	0.650911973599022	0.492411123967602	0.51836549721844	0.719951632406288	0.731755256419791	0.735721363902526	0.909563225186608	0.855773670275432	0.645177553421151	0.802675883315193	0.328934763774869
72.6666666666667	0.742264204056738	0.691297957528762	0.246828831517684	0.228064817819174	0.260123337543651	0.270777053869379	0.892514251230876	0.240127532447971	0.415598993613315	0.236669741697417	0.707506860929516	0.586875285598511	0.395649617871841	0.323994303191614	0.313833497962711	0.0604022587399277	0.754418424831547	0.409322898945219	0.31112408759124	0.273626200951783	0.204594017094017	0.201958269790656	0.140539832908861	0.235794648766191	0.704942574604573	0.819807809491659	0.339348292274701	0.812769128850612	0.900183590098796	0.65711692588106	0.749573809039318	0.42393261656314	0.16347128663798	0.612865305726734	0.231362037192159	0.865339867800589	0.707726682656345	0.636691595502541	0.75349507807114	0.422200055859235	0.615566572147974	0.731393591293833	0.84086248844597	0.642167019503626	0.729657822777326	0.776425846582072	0.497795933141151	0.792880011711763	0.357694348076651
73	0.87791939696292	0.656733059652325	0.099164303835248	0.24094185610037	0.246043539638903	0.174320673764499	0.880968229014237	0.137649687445084	0.3533191407006	0.342758302583026	0.792755304669894	0.578358678293876	0.503730837064171	0.268357031122318	0.354150203728856	0.0743314803336376	0.707969733789904	0.414502287248119	0.250686131386862	0.332096839364281	0.081374643874644	0.224622209898794	0.104884202508747	0.12580756988434	0.661772609735675	0.87069337918289	0.484857994664993	0.720587792465898	0.686060931058752	0.459220144089949	0.794991973591987	0.340949749834298	0.0481447270597247	0.412820466209788	0.304154799798961	0.777417993122336	0.743746893353344	0.609539130285969	0.667569195199646	0.237677053824363	0.584525758284857	0.747778113663846	0.59799942628263	0.749729741903518	0.75940433079595	0.802625059548671	0.492030456196595	0.686127925553922	0.457626795207945
73.3333333333333	0.819492360383466	0.871674015508591	0.183405461871362	0.260079272676375	0.236037843326646	0.542825361512792	0.902192915435359	0.435978543753505	0.415444164892588	0.36960332103321	0.82454985608782	0.624603744504965	0.069551847329625	0.201933179239336	0.357717002099025	0.0284880400989785	0.661880039765823	0.663528789081698	0.155445255474452	0.2786769327467	0.219640313390314	0.192069873838902	0.145907219194059	0.36220100217453	0.694059545256379	0.963058112024352	0.403420680997961	0.808131831732362	0.835580729370319	0.657720738526622	0.794673178231477	0.469766023215846	0.211390722508843	0.455551313979628	0.307198302339867	0.707812532174701	0.695600907904917	0.6196703917307	0.641366806001573	0.33924111239676	0.415897775810697	0.76354292623942	0.709173103279751	0.744865096166839	0.823250314093563	0.850859299245191	0.502229921015551	0.794070283310101	0.431420480350512
73.6666666666667	0.748241402499101	0.684709340631494	0.336069243396507	0.264863626820377	0.135250266240682	0.166163462047777	0.981885850295385	0.584339617904753	0.308225275788659	0.441835793357934	0.725646489212164	0.636850845530811	0.457151901596346	0.152553057364993	0.310246635387085	0.0337200392399936	0.511957362200375	0.439680919435938	0.377751824817518	0.1905809463949	0.134303774928775	0.118626091778733	0.202365934353652	0.228041977876525	0.716303091675336	0.967781341099531	0.523562947852921	0.792932638742509	0.80780015863972	0.824886832008821	0.769149200750639	0.56917242956941	0.158222001937504	0.460459423266862	0.167532249958116	0.688754813335255	0.684467651463602	0.655078465935345	0.689677107904632	0.246411044168695	0.342643318643759	0.748171100362757	0.785891864900184	0.771980991847214	0.832761806222748	0.833930960977912	0.53333247152811	0.818801835691599	0.382012426674605
74	0.848868523528768	0.557396989508894	0.20482017609312	0.221231843948619	0.124043391039453	0.532761269135018	0.997145868891266	0.463208897145583	0.194039094251984	0.0848247232472324	0.81471585711417	0.70244257380184	0.299597521819744	0.289579977119376	0.354840103716508	0.0496405440888659	0.563708163039876	0.409322898945219	0.398423357664233	0.15590486666068	0.121572293447293	0.0726500762512129	0.199426368028943	0.308909268538653	0.753397198277353	0.881447236295913	0.287044301480204	0.760347345599084	0.808887548271534	0.653730324521169	0.623920956838274	0.634819663669371	0.243111721900557	0.49161076875534	0.23127827106718	0.620549595370962	0.799434087615076	0.651029384080913	0.645035043616831	0.232669672425487	0.364150380015967	0.703446191051995	0.678139243330535	0.813747128507724	0.844689971177297	0.89279257390458	0.523701798156599	0.863462480984298	0.214982233977185
74.3333333333333	0.90535320519838	0.370229587958035	0.472242948813609	0.259850234446077	0.153428932312951	0.32697706446316	0.907543763775327	0.287918727353367	0.656318947164699	0.241466789667897	0.878912961020995	0.650234767946732	0.339483561705784	0.200508977142724	0.323134028892456	0.0238319513111722	0.65732353915829	0.710483535594117	0.542598540145986	0.422229954206699	0.292334401709401	0.132600859559129	0.305952919334492	0.326998833947875	0.661357403020398	0.822253818491828	0.536952769496312	0.726821042488482	0.763852115010073	0.731944689261511	0.490940333265505	0.644574073096482	0.188140671818325	0.520750395375471	0.235522421399453	0.816305623622923	0.801962837669367	0.756237057826913	0.701820072299155	0.255947013525914	0.292825120654276	0.701405683192261	0.610259978963697	0.79173235439845	0.728438400709482	0.957914779888295	0.539446979588143	0.680828989160254	0.305618528568757
74.6666666666667	0.795377132758863	0.604226851147941	0.313535293239815	0.149243855731364	0.181588528122446	0.368610625562794	0.945784458712222	0.385844233006134	0.599806464099091	0.363883763837639	0.888557308284433	0.563807682938285	0.367837923393479	0.246246877261796	0.37499845659958	0.036350680599142	0.736910416436541	0.547276095421724	0.136	0.413267711232828	0.0829772079772082	0.184108553999723	0.291195582319758	0.311335917556963	0.70208687508506	0.704104431710576	0.25608033892986	0.860647715980608	0.853893190036234	0.738346603460109	0.511250536978001	0.700182418600832	0.325252889359497	0.576248386686299	0.17082705087396	0.756038547865659	0.767885839482282	0.883873838413225	0.703428155338239	0.403144076926146	0.362735776136819	0.79304715840387	0.696237901469354	0.780595468672582	0.739915749020767	0.923508310388591	0.62669183137919	0.873955329807074	0.343671403000569
75	0.828071876515021	0.187623536566824	0.187807789882107	0.241533538195306	0.19573024246477	0.30239949149849	0.88895047227841	0.352496673612332	0.247648538803948	0.32089483394834	0.768251188112184	0.577685183268664	0.294170849726405	0.149284396815391	0.227827509569083	0.0322705021645445	0.767314702308627	0.575743828210654	0.522452554744526	0.372564424890006	0.439814814814815	0.100589213919312	0.32861257229905	0.349658063092875	0.677619666035399	0.906299259903475	0.377896333490245	0.865548495889668	0.723985506436825	0.782409925029722	0.65197494856316	0.483230392933185	0.273030391781377	0.459368732314143	0.350254090579103	0.750432427980149	0.7498709082749	0.9319973302757	0.740725671689504	0.318964210190321	0.337611733588583	0.888558041112455	0.683520499771575	0.783669654520066	0.745392062670904	0.948342216392345	0.598665925514175	0.821866625930099	0.322846418362167
75.3333333333333	0.908480990882505	0.494095585626679	0.134606775108192	0.242532399366327	0.129207221933279	0.305524657026325	0.945688630353762	0.574916944911673	0.000774143603637771	0.296632841328414	0.828292688368772	0.590510248110472	0.355040021706688	0.231934813569611	0.427196258797383	0.0115962966035931	0.543328178504363	0.631923178707799	0.524087591240876	0.263558408907246	0.133368945868946	0.176039789269375	0.239937638350035	0.317575872175475	0.664185422092227	0.781724450649265	0.175061457189184	0.882347405823722	0.85271084000849	0.89277262515986	0.904736711207579	0.569627009684023	0.249419875188681	0.473959753503845	0.311972971463673	0.769979202273336	0.71192517988389	0.917158112710283	0.706776713795124	0.20909308542473	0.356425118113071	0.866732164449819	0.601946389299109	0.757274447096977	0.715830315571651	0.799730021558637	0.618224595059271	0.885472957920399	0.332218901826981
75.6666666666667	0.877606618394508	0.663625766560236	0.385837934636621	0.263998371283696	0.176350397503529	0.325070183802108	0.927924124659745	0.291031724114846	0.438745887362106	0.504059040590406	0.785202704210268	0.584485413180441	0.245737801293357	0.235180126543859	0.34422459562909	0.011718311508934	0.578896498398321	0.419795092813126	0.506335766423357	0.285506644518272	0.251424501424501	0.127121170109524	0.27708090352986	0.246036998518798	0.680754476735737	0.829494577298176	0.446728385375804	0.776254178084254	0.883613931993461	1	0.560141536096227	0.472370327356338	0.213238110257508	0.504989911108688	0.254118501144804	0.761608632086156	0.802342471901436	1	0.741904286768351	0.246961656625304	0.324488529637857	0.758781741233374	0.607896050912104	0.852855727219495	0.770113073682655	0.844793225728549	0.592435073748982	0.717778329418804	0.338284347962155
76	0.926581486636536	0.56464446809589	0.430308909118042	0.261746162019099	0.16288976397454	0.326606282112399	0.923093857402223	0.430254646482397	0.101993419779369	0.627675276752767	0.737934804435619	0.557935697943054	0.528783973228418	0.195605986318321	0.203753549820966	0.015925385445086	0.58359107478184	0.502892140183736	0.12770802919708	0.281533402172937	0.254451566951567	0.175322334673506	0.148596862875776	0.0870127005136931	0.691319180935553	0.838240132284744	0.427271300800252	0.774127495558433	0.850742739253648	0.908302986434843	0.672863958036582	0.550558107069747	0.25822876067317	0.485527136996843	0.333193723125035	0.674973745444062	0.868789722850924	0.935734944295175	0.680233656403028	0.181263216693931	0.318554816959152	0.795843409915357	0.700248610860257	0.726859150488716	0.691833567363831	0.865498179223698	0.556652920873353	0.827133736879961	0.356922451596652
76.3333333333333	0.894887634299298	0.615174091531094	0.443292045963288	0.188212165747333	0.235889243876464	0.317389692250649	0.881765935349528	0.330069707696299	0.425314495838978	0.253321033210332	0.724859992413932	0.597597071649999	0.485641930086375	0.296070603067872	0.257857451537227	0.0460386640832044	0.710786479620016	0.596461381422252	0.166131386861314	0.202472613809823	0.111244658119658	0.202693054207681	0.225216004570014	0.20475245028521	0.758880233622979	0.917831262569769	0.290705580835818	0.771338342015719	0.743850848871461	0.790645779499623	0.702154694883447	0.478449969792418	0.186045463761912	0.538577133058237	0.0844641760205504	0.625671807754875	0.852716395533828	0.773359231940855	0.813748141259439	0.289618162231178	0.315086072716569	0.729217049576784	0.751872549748733	0.822766992477816	0.527448082181657	0.844783683260529	0.608697338314567	0.898333619762328	0.384674467687211
76.6666666666667	0.890177189059006	0.685621610663424	0.230114908222652	0.316581731656264	0.192721103598583	0.3082790402034	0.920364044163924	0.410840258077474	0.27946584091349	0.571217712177122	0.712633035096722	0.66919771298285	0.310676977343644	0.338026195979548	0.365847635510557	0.0372779938797324	0.762647741080305	0.49741030584855	0.122861313868612	0.359129478315525	0.228454415954416	0.215707749896021	0.183371813486302	0.202640950490057	0.835483565887539	0.701240741641372	0.371044510696167	0.711512692342437	0.843481061917902	0.807631291746519	0.708153021773045	0.496427880131623	0.136977042827855	0.571061545266704	0.246076953146814	0.791899182505199	0.802813797452268	0.809753050502285	0.677941007893492	0.481973426964051	0.336034069082646	0.837484885126965	0.721672704864911	0.835333993964235	0.750831424137167	0.819537249023916	0.617668730690177	0.893196993132069	0.397899754596076
77	0.878038252818917	0.555268359434393	0.362856290105954	0.239122274604114	0.188510785843426	0.230997404523544	0.848288168823668	0.273893505384982	0.166092510160635	0.429243542435425	0.779931502264664	0.624834611593986	0.378374711708045	0.325651981041769	0.305284603037412	0.027829159610138	0.711200706947973	0.478431817322596	0.439474452554744	0.342063616772919	0.271812678062678	0.178147095521974	0.242817699283555	0.241656424316914	0.814810884874711	0.785297626369979	0.392646058894294	0.748897136318468	0.770869874466081	0.706400789081867	0.574412715639061	0.511596192085027	0.19638632933066	0.499833366660001	0.133048528508405	0.79244486543253	0.804835832323924	0.899539643694487	0.731555077651359	0.468411602761043	0.302943350197049	0.707376058041113	0.650430819247155	0.804445745687131	0.733064814130515	0.822413202077909	0.532466357278591	0.813973915866257	0.404292469572585
77.3333333333333	0.951197159970599	0.60812933961786	0.310102969706013	0.339561900762824	0.165960819278302	0.496265692038773	0.830016031825375	0.445961890894485	0.429920650280627	0.40719557195572	0.71803810883777	0.621460767720641	0.340207117984896	0.259181434008078	0.257778738115817	0.00500261111897432	0.678890975367282	0.516615628898718	0.363620437956204	0.325182948729461	0.414440883190883	0.176784971579093	0.23352295717992	0.188018026535565	0.66411391426904	0.659684336101662	0.543072336419269	0.759319762714927	0.877363303579076	0.851334575962256	0.750204616880328	0.414846879820749	0.157140604230968	0.54622408851563	0.265231473725359	0.753104215143216	0.85523871110961	0.909961836633409	0.660625053481678	0.367489925388022	0.355114280087333	0.807194679564692	0.702862212211681	0.758659519841448	0.697324661887518	0.833712952285458	0.563594761947852	0.804999140713017	0.413580034883233
77.6666666666667	0.972137685125815	0.812883280117582	0.404118788240561	0.316200001272435	0.323129504420833	0.270671116054875	0.905150644769455	0.564071665871681	0.225895103541707	0.299907749077491	0.876358240924608	0.634059742033891	0.36996336996337	0.276645420373094	0.193267687368811	0.0267749508279932	0.814398541919805	0.472987788741447	0.336817518248175	0.210037487653767	0.269497863247863	0.221561763482601	0.171137505057958	0.284674293277867	0.761650585095463	0.813536871797659	0.193943197865997	0.788393206660845	0.87297278174377	0.886554480027303	0.706052589929684	0.346800635825605	0.249645166377543	0.547423848563621	0.29178533534372	0.828449642732121	0.942802311908128	0.771641024763404	0.627231497761439	0.357235765870007	0.435134694430738	0.743364570737606	0.70303220254348	0.704281338678437	0.801847609193703	0.732225868749959	0.588143283736443	0.847804362631837	0.370493135941561
78	0.930678885882739	0.528761846839998	0.536263244291897	0.316250898656945	0.230279614632093	0.308384978017903	0.912208273872269	0.566105155691679	0.196903425585446	0.198616236162362	0.724062339632745	0.63965787089594	0.467914801248135	0.166444864700801	0.261140264230152	0.0184925790534572	0.748205014912184	0.470114551434728	0.150131386861314	0.264001750920356	0.279736467236468	0.22869125190628	0.235129602742008	0.0789448804008697	0.682071604704753	0.766808086992096	0.544798368115488	0.863749284832425	0.898183835878644	0.751611729716958	0.792679011508286	0.364274108876337	0.240137878207583	0.591978573982173	0.149690065337578	0.785253176286473	0.979982337356491	0.770804168877175	0.589481909873081	0.449431432789371	0.542106700944693	0.705728536880291	0.756111683647993	0.805965947479843	0.748436922622127	0.753367573666018	0.561423012784881	0.826595886879643	0.420680719189976
78.3333333333333	0.94660244280062	0.555166996097511	0.329428443515893	0.23277282588641	0.219147039155955	0.105620001059377	0.908792122390944	0.310538163499276	0.263905554480356	0.421033210332104	0.764168098351145	0.550877533766302	0.274589607922941	0.240036422217553	0.210925731571799	0.0138804156315736	0.718463492764829	0.504026312804808	0	0.340402487204813	0.154736467236467	0.184250658533204	0.136505367386285	0.363430084144843	0.752391475344795	0.567834552523394	0.390763115225692	0.618488211027131	0.770871736434628	0.638492493596211	0.666610142666576	0.287250640811323	0.161173316511591	0.561875503687141	0.148405651421232	0.793726705516545	0.872293296399427	0.752641486831072	0.673964392908289	0.420839484499062	0.496678433855622	0.726602176541717	0.655121489965258	0.722377370388721	0.72200133027862	0.777893184549129	0.587884742169422	0.634316103038057	0.493619688798818
78.6666666666667	0.915258902460004	0.852465663169632	0.45724518728548	0.246947747472627	0.228050622879362	0.271253774034641	0.897419627201786	0.348396220888878	0.451248306560867	0.153920664206642	0.719683616323434	0.569900981901613	0.0763804097137434	0.398799934626789	0.303674836399556	0.00987832673639412	0.684248315475533	0.422139049563344	0.114744525547445	0.273833842147796	0.279113247863248	0.09936226258145	0.199414466950706	0.0626831804859602	0.753874685999922	0.728787666392981	0.145562006381087	0.680880935890873	0.897552628540998	0.676337670033266	0.658093106332949	0.358602122155942	0.172415346835785	0.477928656692904	0.155442005919473	0.740841793134691	0.89800064666509	0.670393442061848	0.679190662785309	0.505182938993736	0.421255482119449	0.788845223700121	0.785365957311178	0.680712580514391	0.651149212918483	0.726393218681804	0.651679873831715	0.766891354299936	0.470212810619158
79	0.869633892685673	0.465865896305306	0.504327712281749	0.264914524204887	0.216410332615103	0.566290587425181	0.90337393520449	0.43964384639202	0.392839171666344	0.202444649446495	0.728814788371003	0.581168888032646	0.367566589788812	0.348112348532605	0.283234041239659	0.0749122712830599	0.655224787363305	0.553249404559374	0.37156204379562	0.288357502020293	0.135728276353276	0.076084846804381	0.278961273891415	0.0387948693706468	0.8511691529091	0.781575687528787	0.25466813117841	0.744090457406125	0.733388447602343	0.780302206353909	0.628309480205295	0.333655938575962	0.150517043278437	0.567850066350366	0.164740045792148	0.833597594876758	1	0.768214878578885	0.711415290673926	0.401360571360172	0.527645129252018	0.805849455864571	0.77535777652646	0.710699968469888	0.641327322444757	0.725051400871007	0.642320669105575	0.809804782727695	0.431159046932069
79.3333333333333	0.912678479270601	0.689220009122701	0.484554544097895	0.285464343201064	0.27176362780791	0.377191588537528	0.954976211257501	0.394354764475016	0.346197019547126	0.428966789667897	0.738743613199759	0.57058562223457	0.266540044317822	0.156545492750578	0.243699839486357	0.0410750977339392	0.737849331713244	0.543155268231825	0.374540145985402	0.276802550058364	0.22306801994302	0.137117010952447	0.260919239283079	0.362768270776212	0.827179431582007	0.890922302738672	0.312725560960302	0.841259146616881	0.849871337973359	0.808358867232476	0.781283773090054	0.346269803562735	0.307590060152748	0.492150054837517	0.162869269000949	0.757644708934785	0.920426412890834	0.708837471976452	0.684228031341474	0.524119219566692	0.603982914634585	0.69319830713422	0.75531485396768	0.789074816449709	0.623065553174193	0.763232283490576	0.519151466577039	0.747506476477815	0.381522954617448
79.6666666666667	0.910695463146865	0.691500684202524	0.800925235039546	0.319196584785499	0.273794486960398	0.280364426081889	0.956807309890782	0.323994343048896	0.348558157538223	0.361715867158672	0.760436422053147	0.620699702420283	0.16388549721883	0.142210081483038	0.289980244474627	0.00567125280024211	0.825306528222689	0.620921704283392	0.458861313868613	0.299828275118973	0.170405982905982	0.0561347566893109	0.22214552638469	0.177555072326747	0.902029668826511	0.691579721298015	0.391286155133637	0.631263362341534	0.745517310721587	0.567175094416046	0.554527572407244	0.339814765935233	0.284948295672156	0.568801391236904	0.158262132127101	0.712867821180734	0.8094059206854	0.625139903821471	0.722051888125211	0.476271795076407	0.530563279170381	0.704322853688029	0.681581547549483	0.793061123372821	0.633988618727367	0.782698184215143	0.572307612756441	0.788609037153023	0.377797051336364
80	0.875464085200882	0.717753788454716	0.471272944336665	0.294091449875619	0.231171211333185	0.379787064992849	0.827120461426496	0.529234554264053	0.352738532997871	0.24109778597786	0.690142573462148	0.625995315786373	0.317234206123095	0.274800961920104	0.486898073836276	0.0230071305510681	0.66856290732354	0.348380023439568	0.473284671532846	0.221087366436203	0.290776353276353	0.116771800915014	0.247982767238712	0.181147773470739	0.823472558296176	0.747134164308866	0.294157644228255	0.700803998915956	0.835318191805104	0.665000243775292	0.433948314454317	0.389493040525084	0.212855115236443	0.581707900844073	0.268526274641202	0.73384572617013	0.768085308316081	0.67130217514076	0.697083008406916	0.554295176156087	0.496002896973213	0.833116686819831	0.690293552054227	0.843126435746137	0.588433966447417	0.829809348829323	0.56559845909226	0.827814801377405	0.375163634420667
80.3333333333333	0.895275479724129	0.580355785312452	0.644754514251604	0.311969156184986	0.182591574411175	0.179352719953387	0.891840862766021	0.393869404764893	0.319605186762144	0.0243542435424357	0.619084540038823	0.587929313273902	0.531994754216976	0.346874927038827	0.405371033460921	0.0405235903617986	0.733900364520049	0.639446523760916	0.544642335766423	0.258344931310048	0.401264245014245	0.119461389158464	0.346845024159188	0.146733478301976	0.849351470177778	0.729703131749769	0.324755478843035	0.817312324972146	0.787837993840608	0.621702001582664	0.637380451739809	0.384472129839812	0.201342735485615	0.574103361145953	0.225247110068688	0.767657475856104	0.805117340758721	0.729099994865915	0.770265317556037	0.41146710290069	0.484213825423481	0.748276904474002	0.737582737481806	0.720519345975406	0.457763653831941	0.823432778084034	0.636451775534212	0.800508570592017	0.439266345313472
80.6666666666667	0.713616814975838	0.403020627439055	0.62326518430085	0.235693063322708	0.331599673081209	0.323587054399068	0.919131225282111	0.356245658959489	0.487671763112057	0.108487084870849	0.650126062607376	0.598167074531857	0.457965902410347	0.43725339123532	0.372589208544265	0.0248275929387534	0.676626532641114	0.595062568522929	0.320934306569343	0.216339678548981	0.210826210826211	0.111143075003466	0.278913669578464	0.217768113201601	0.878122988842473	0.76487416642588	0.556305246090277	0.827335963142521	0.74446343652363	0.698813751926763	0.664401184743042	0.41531905658496	0.164575213463402	0.501935976441075	0.114396604679734	0.704337664477071	0.69147318994098	0.838897540773193	0.774611662476932	0.301392490922875	0.49759962051345	0.757088875453446	0.705746735654409	0.759875681275618	0.78633508240337	0.811371832542899	0.631216308802048	0.75328597707295	0.415827026490647
81	0.938836150946937	0.703056104606964	0.0433517385464848	0.252368318923011	0.229685216831364	0.196302770273849	0.910234727679115	0.286738801161516	0.149022643700406	0.304428044280443	0.664835226131774	0.557897485459354	0.178673178673178	0.367981135159114	0.368738424496851	0.037190143147887	0.850022092124158	0.680427961135685	0.453897810218978	0.194009832091228	0.266114672364672	0.118251767641758	0.232880298955085	0.100532602187136	0.868236455610942	0.618977596846222	0.549610335268581	0.687686319973501	0.764414429511457	0.599349682529563	0.760627642497004	0.357484734906474	0.234888593507108	0.454763592735998	0.219104260903557	0.763369231719622	0.705937897630664	0.885987370150429	0.734396670170221	0.300115708414794	0.449793209477846	0.659174727932285	0.648667169554732	0.808859961263006	0.811588204862907	0.77095507626267	0.582649275437258	0.727246398951033	0.427740375624482
81.3333333333333	0.90054579860188	0.242461101819472	0.623115952842859	0.280209188250339	0.21362409292419	0.205837173579108	0.927377644020958	0.529577653369484	0.286200890265144	0.37859778597786	0.723331622749281	0.552523854939043	0.333740333740334	0.292661857066144	0.380357142857143	0.0374195311699277	0.555230310394344	0.508638614797172	0.182656934306569	0.325042650624046	0.176949786324787	0.0256481353112435	0.174505510199224	0.4068576470959	0.759189331955462	0.754841238281328	0.307285945917674	0.834856514800205	0.814583310058726	0.680699372559903	0.866709624906736	0.446368344800483	0.0785365084371551	0.489926257172808	0.188948455911096	0.635555875872578	0.762812253177426	0.741948898738726	0.738221518282257	0.252503690699437	0.448113896788976	0.751949818621524	0.773339141336337	0.906288005044817	0.702468405882788	0.780200993737939	0.681955091329808	0.858736402579134	0.470769072235771
81.6666666666667	0.888147256150009	0.736100552430186	0.352111625130577	0.266123337087015	0.283131485746836	0.285502410085279	0.868878316114445	0.520832810316404	0.633946197019547	0.215359778597786	0.740601084361543	0.510603168133336	0.213901325012436	0.198174219607294	0.318371095196938	0.0326316662843533	0.6855462277698	0.419870704321198	0.258277372262773	0.287633563796355	0.248486467236467	0.0711874393456259	0.153440601718516	0.459991806120198	0.877257974852313	0.826141685428938	0.350698258277106	0.8323308440483	0.850509993185195	0.699260048230004	0.755502046168804	0.387662988966901	0.172392817716899	0.376609526579533	0.206734796448317	0.730756954883347	0.714584228128001	0.687847620351514	0.758711660700937	0.146067908869648	0.426318832231792	0.767261185006046	0.761477003495426	0.694169181568397	0.699068804966374	0.755360481410171	0.661956901120778	0.76433895370671	0.414594282050401
82	0.824897174045635	0.277279408038113	0.400910311893746	0.298945787923323	0.21805730985462	0.465278881296678	0.98602977930988	0.411543192830066	0.472963034642926	0.504243542435425	0.69768401793882	0.608431902965766	0.242798353909465	0.246760523919591	0.434065934065934	0.0220798172704778	0.461173091792776	0.423386639446524	0.276671532846715	0.371565502379456	0.383146367521368	0.093685013170664	0.129495632304287	0.155998865462797	0.818741508445997	0.852341159608524	0.437889010931534	0.807119305007678	0.870844551693832	0.726536628175173	0.770641434353026	0.413532996650771	0.15901052109852	0.453727436330916	0.12095828446976	0.693022465663159	0.683105150639185	0.72064073383191	0.705665909446842	0.109196824003511	0.428461914755292	0.882088875453446	0.793339566312166	0.781012116571325	0.87306924839258	0.797818591810654	0.540067479348993	0.803255106392459	0.413414015121156
82.3333333333333	0.818184945967503	0.411129694389539	0.577600358155499	0.268929055408165	0.272296109171063	0.371259070925366	0.897507685693344	0.446798717980904	0.260305786723437	0.530073800738007	0.749146567304045	0.631517019681022	0.115949893727671	0.292311643435829	0.324989196197061	0.00489035740606077	0.653236496189108	0.677101054780538	0.115503649635036	0.415540540540541	0.220664173789174	0.0921426590877581	0.266346130959465	0.176294475434118	0.88430726219612	0.869297294513788	0.312568648987918	0.682759191785359	0.824032800437935	0.67140215797389	0.790813719505302	0.364901722711996	0.140604230968527	0.436258202904874	0.208438040989557	0.849998970409571	0.696570905540247	0.644558725377783	0.810343073860416	0.126277779994415	0.423318093164795	0.792654171704958	0.617133963005854	0.763186342957524	0.884177074865125	0.788510281275255	0.542084103571752	0.754008414647343	0.534035005362247
82.6666666666667	0.913895187901725	0.448938219046171	0.498731532607073	0.237595353068794	0.340181291329222	0.326553313205148	0.953585405082011	0.436522481359677	0.384284884846139	0.594649446494465	0.778765702046007	0.656907622912842	0.320173653506987	0.185566528915972	0.405809359180146	0.0421390677085113	0.635866563570088	0.362897432989301	0.313167883211679	0.307286522402801	0.281160968660969	0.0160647442118397	0.185514007569086	0.189278623428193	0.919094664824379	0.791685858062818	0.461268894816675	0.805903520130085	0.813400960030983	0.639006296903304	0.927610843564177	0.33237724870518	0.139680537094194	0.394321135772845	0.201234154241358	0.821710973374791	0.622402280379184	0.704124381770575	0.773266749654084	0.0985237202250329	0.491615083743279	0.878929866989117	0.77150112087375	0.78030268906806	0.906348385189565	0.81835398298945	0.604134079656657	0.837384712329813	0.608673292190965
83	0.853769763695792	0.637828797324008	0.38844948515147	0.276111948797231	0.130953265472918	0.259812490068329	0.903640700634798	0.616900559837321	0.113295916392491	0.274861623616236	0.802600459626498	0.618077370726372	0.436756658978881	0.388270178142	0.299344054821583	0.0463412610484497	0.770794211863471	0.492268723299686	0.34785401459854	0.343758417886325	0.326611467236467	0.0423852765839456	0.245566848356461	0.519239860073745	0.94294829061702	0.787317371813394	0.154349076834563	0.826537986690355	0.847285063660705	0.582405424562798	0.736363019738181	0.38918509915712	0.268682271836349	0.518338756491126	0.257860054727202	0.832799662294339	0.634169332953699	0.642126880358701	0.76169856192815	0.231604357020309	0.369603381496219	0.774697702539299	0.789217300766019	0.845772712940858	0.937794693666395	0.859708103243632	0.580503380430989	0.77791568803427	0.46695538839083
83.3333333333333	0.894421594232364	0.303380467284983	0.327637666019996	0.320348138110053	0.190863610471308	0.299221357063403	0.92745534268998	0.591293650992896	0.103735242887555	0.32140221402214	0.826267877462683	0.628079488334843	0.485415818749153	0.30578319441526	0.351370539572787	0.0109032519412572	0.682839942560478	0.499224982042267	0.253839416058395	0.347389332854449	0.190037393162393	0	0.178266250922333	0.251741199457943	0.962096240303193	0.838646370036819	0.207908363408128	0.795085669547412	0.936845750801577	0.619204242440153	0.550609328720975	0.419213781695965	0.218194516412463	0.459865602637048	0.158708884793656	0.761598336181867	0.652261477903196	0.538527886639399	0.819344141072152	0.253489207197861	0.430969236600969	0.790825272067715	0.881452992361059	0.837338408179811	0.769344468258074	0.899243282286023	0.622697364168724	0.790903651651422	0.434452726349817
83.6666666666667	0.804347622100934	0.615072728194212	0.518430085061931	0.303023940857239	0.196683755603438	0.508501509613857	0.951886394186068	0.471619009364096	0.384130056125411	0.395110701107011	0.799326178629599	0.651865167251265	0.332881110658888	0.363054796759357	0.453826089640697	0.00325535767449352	0.772892963658456	0.558731238894559	0.148087591240876	0.449616144383586	0.246038105413105	0.0473727991127132	0.173220193749554	0.138413538810627	0.8956839261947	0.690881678963464	0.470735917150479	0.80107425697853	1	0.552728595591793	0.868491261389586	0.331588332248207	0.205623268073986	0.354607866305527	0.227117886859887	0.869257459382657	0.739299060083552	0.572974175551486	0.7703331282866	0.265953796432989	0.495909719472192	0.732421402660218	0.69451674935988	0.81704652943561	0.754474909467149	0.877963578601676	0.495158809157542	0.675431393890788	0.409669029108798
84	0.932855824718891	0.451573665805078	0.123787494403821	0.248220182085393	0.159286227307626	0.477408761057259	0.908561616339512	0.572389727110687	0.442810141281208	0.50119926199262	0.796012851692363	0.634510330904187	0.510288065843621	0.369405337255726	0.548982899123349	0.0380296056966319	0.661244891196288	0.462893652413897	0.282510948905109	0.472821451019126	0.285701566951567	0.063021627616803	0.200592673696237	0.0655510384166903	0.933504644548451	0.66613264520854	0.484387258747843	0.840370833207865	0.874769581392231	0.588372293625464	0.880413303488661	0.356446532580197	0.142586793430509	0.338883738403834	0.234991902607919	0.776558285114181	0.774416835169572	0.563236527304776	0.749281125528964	0.284407293620077	0.495039356905829	0.770843409915357	0.807055661209269	0.815436241610738	0.825785233907324	0.873161515079669	0.578551391599984	0.788268504904301	0.378180614234954
84.3333333333333	0.847767542967956	0.740509857584512	0.575585733472615	0.305047111891537	0.175805532852862	0.343821176969119	0.954621387335635	0.507811780851723	0.320147087284691	0.378367158671587	0.759125594056092	0.741572157110627	0.267987156876046	0.335551352991992	0.374459809853069	0.00923408803619448	0.632801281343202	0.603152999886583	0.237605839416058	0.522649726138099	0.321447649572649	0.120955219742132	0.199604884202509	0.237590999338187	0.901319204002593	0.683698136741916	0.448506721062817	0.887605769520311	0.85417062334983	0.734262429727085	0.83741888805987	0.4011860141829	0.280690292202672	0.403234504614229	0.226252303568437	0.902425715050553	0.737677571499121	0.633681310218541	0.877298097586099	0.371204564497467	0.515019577863567	0.817790205562274	0.807145968573037	0.81940002702581	0.96672825363979	0.928271470002518	0.555929004485696	0.838848682744881	0.435808554406775
84.6666666666667	0.822798429851587	0.513608027976281	0.510819280704372	0.344390790118273	0.200807390345989	0.317919381323163	0.857824385468277	0.642256420555821	0.447725953164312	0.512961254612546	0.814860884892568	0.723058208757983	0.330846108623887	0.403189278793397	0.336802383010248	0.0159302660412997	0.688694355462278	0.708366413368115	0.362510948905109	0.482659154170782	0.0795495014245017	0.129238874254818	0.255194820650751	0.395921969052346	0.913643923334387	0.84325802677164	0.358491552905487	0.901318166762022	0.844687617536765	0.744114701900322	0.759754911935608	0.456662384815264	0.244238177844865	0.369520035386862	0.188194560786285	0.911311080452196	0.766079359640699	0.689230400629781	0.772183392506269	0.273770099349639	0.389318893644236	0.758872430471584	0.880539294327635	0.812193144452953	0.831350232798758	0.934032918578525	0.540610416639735	0.802481748107978	0.461106531255606
85	0.910689207575497	0.420961938067001	0.251678853902403	0.36499150649896	0.325048913985685	0.221515970125536	0.936644505279625	0.465125231173482	0.330946390555448	0.341512915129151	0.719544166536514	0.680497462850301	0.456021344910234	0.414839718895193	0.371051981726139	0.0339591884544616	0.939826576825362	0.527957355109448	0.351007299270073	0.375039283469516	0.229122150997151	0.0959586857063634	0.227727132078166	0.243610349500488	0.909918596416766	0.819249947789866	0.420733301950939	0.825841639314644	0.903818152703764	0.642235381920875	0.652101562323362	0.491401103896485	0.223691621420686	0.358704016772403	0.248785391187804	0.834143277804089	0.680312586965998	0.499979463659234	0.851016595869035	0.365040098950644	0.460557328516339	0.799410519951633	0.637527490623971	0.895398855907391	0.873039686645481	0.981659376465778	0.540933593598511	0.783516966144093	0.477885976864097
85.3333333333333	0.849475313951488	0.610866149713649	0.593941202805551	0.368261663453769	0.262166579983654	0.339689602203506	0.967796491646098	0.827956719303091	0.250628991677956	0.141605166051661	0.779228675338584	0.717768964139176	0.327363994030661	0.386542457565782	0.325307136683541	0.0255548017745848	0.691317795206009	0.266795206230388	0.256408759124087	0.520034569453174	0.229300213675214	0.108339109940385	0.251398376692928	0.216160852163499	0.90580343652758	0.740725906811348	0.388409435639939	0.868224728236321	0.882967828907434	0.813376887852115	0.713260530421217	0.507757189697748	0.355171559240318	0.385086619039828	0.348522923996202	0.812969750633198	0.730437174556142	0.492500812896822	0.818168755075714	0.267461995770658	0.520968114235616	0.814268440145103	0.816022651211712	0.946241160308094	1	0.897005206517359	0.547746163889499	0.843975761741998	0.649430189644183
85.6666666666667	0.805048246094178	0.850539759768892	1	0.383689933133561	0.313792505634396	0.391440224588166	0.929861411474021	0.768382999020912	0.35815753822334	0.474123616236163	0.741069635645597	0.689571335542227	0.413241079907747	0.391795662020499	0.315489566613162	0.025232682424485	0.869021318899812	0.621640013610071	0.391124087591241	0.509467316153363	0.213764245014245	0.108255926798835	0.247137790683836	0.152185559862595	0.873560328382378	0.662659598511224	0.237564726188609	1	0.818353796367672	0.659097131327375	0.742870062628592	0.439631760779414	0.157929123391984	0.354007986281532	0.428547495392863	0.78005374462039	0.670553091686493	0.339681344445776	0.87525247388076	0.260491561265611	0.493830167063024	1	0.748345250363885	0.927379397324445	0.900118246988397	0.868343302765628	0.696924648060292	0.816475395749394	0.579990992950839
86	0.750412085763884	0.478029496731033	0.384793314430682	0.325081594869543	0.228657403967605	0.422956724402775	0.872623391961296	0.617695545569419	0.166905360944455	0.180212177121772	0.885969120239184	0.734404132043238	0.414055080721748	0.37643295743737	0.322133905420422	0.00889244630124017	0.646636474096985	0.561831310725492	0.312350364963503	0.387492143306097	0.420405982905983	0.173825038125607	0.239318782281674	0.294128769972582	0.882600301255539	0.691542530517896	0.491186777551127	0.921647746092927	0.84301929371809	0.687435071388657	0.686976870379163	0.450653128977576	0.199292585666975	0.444074821399357	0.319846987211705	0.80784239029714	0.641020443946845	0.377979908613284	0.807049409804463	0.244978653792443	0.531628467420699	0.803793833131802	0.945884640311082	0.899565334894824	0.936309215874658	0.886171569170782	0.505487544760009	0.902976952013596	0.665057038283776
86.3333333333333	0.886842969519729	0.372256854695657	0.359125503656171	0.366575687591854	0.396512866235728	0.267069230361777	0.894953989438161	0.525150838082327	0.329436810528353	0.312730627306273	0.870981057140944	0.680513384718509	0.199791977569756	0.41726786673204	0.317604025188295	0.0278389208025653	0.794211863470673	0.458394767683642	0.327065693430657	0.513457394271348	0.152644230769231	0.130777762373492	0.257063289934068	0.137625665752734	0.883682145419232	0.709030779661793	0.36701710340499	0.873799271281881	0.77601076962608	0.680560608163097	0.922089579235343	0.441200795368562	0.464189965530448	0.37136209121812	0.163288099625845	0.833633630541771	0.723307772367454	0.413921927677853	0.86118497637119	0.2743366715876	0.506231245380831	0.769558645707376	0.699180859088639	0.862145849286068	0.830810730914197	0.93389638788224	0.544876352495573	0.669394107200825	0.611026192956945
86.6666666666667	0.901506028806906	0.559018802898992	0.535890165646918	0.296629956928088	0.363920053495802	0.43927114783622	0.937646818110006	0.924392672742032	0.460421908263983	0.477490774907749	0.727838639862558	0.700598821463315	0.425496314385203	0.374238285354066	0.365171626126682	0.0280536670359651	0.567795206009058	0.420097538845413	0.100029197080292	0.368007542426147	0.343037749287749	0.111326771107722	0.266786470854259	0.346443541016671	0.884261128116645	0.627528615444473	0.372038286521262	0.840186395254298	0.831493708408277	0.676390175480706	0.736433109498293	0.415858687172629	0.19444882510645	0.325280398465761	0.249706818562573	0.858179066367399	0.686179222747168	0.38133417760512	0.955096380037167	0.211794278418385	0.295542091877251	0.830985489721886	0.854892003017328	0.926726273591279	0.81326583401079	0.939574156354073	0.526843078195897	0.861132858497712	0.565947056870356
87	0.877506529252616	0.562363793016066	0.496791523653185	0.332633494296312	0.292654233846001	0.415117326129562	0.864729207188681	0.664407233533335	0.238591058641378	0.431549815498155	0.754044043820701	0.601477230932369	0.383213494324605	0.423851882981952	0.516583837510804	0.0475516489094307	0.886750248536397	0.550829836301085	0.435737226277372	0.405310002693723	0.369435541310541	0.122376265076944	0.311927260609811	0.223125649995273	0.825281014211603	0.680582693699596	0.407709608243109	0.904261645939354	0.949516446768181	0.736482660075983	0.784632254855412	0.38547220609196	0.260887196701737	0.348724194555028	0.281342491762998	0.912016349896011	0.783788653118872	0.312872862937039	0.965573137909266	0.284794318317839	0.490132714408842	0.840296251511487	0.815029270210257	1	0.753174192594783	0.865919515888576	0.539640885763409	0.896990586033722	0.630337917005385
87.3333333333333	0.904730775847239	0.394506107141048	0.622966721384868	0.279044910579657	0.263838323798202	0.532443455691509	0.884635606192066	0.496163147808769	0.196400232243081	0.240959409594096	0.828169972556282	0.657589078872159	0.629584407362185	0.372277089024305	0.505945178417089	0.0157106392116861	0.789959129570308	0.631809761445692	0.078656934306569	0.422022313010685	0.290954415954416	0.11884098156107	0.262466379453978	0.175285997920015	0.863964439851541	0.730787386031715	0.489303833882525	0.900501370110512	0.93483482477014	0.806029875599594	0.635216713016347	0.414099022212837	0.166062135309888	0.318712015172723	0.289272351594348	0.912129604843193	0.716299016650822	0.386043845087536	0.876950971227261	0.270705821330248	0.466825633130531	0.814268440145103	0.781950214081574	0.941263907031214	0.860424211070875	0.862069497060553	0.561384231549827	0.929977658538448	0.62372193407298
87.6666666666667	0.870381433464179	0.633419492169683	0.745784211311744	0.308164576692815	0.184993932189117	0.422003284072249	0.896922355720047	0.322898099565687	0.413353977162764	0.286577490774908	0.846410004685513	0.645033093603071	0.25876181431737	0.286147883542294	0.492432707741697	0.0244908318000127	0.867778636915939	0.570224188121432	0.599883211678832	0.457439166741493	0.254184472934473	0.134722029668654	0.344500511746364	0.300809933503514	0.890366973535185	0.860294264895623	0.547047439719651	0.776186425366617	0.945885608100308	0.948289635049637	0.882131633091411	0.347134972167966	0.434293824768513	0.318221204244	0.321243089294689	0.887491505878961	0.747181296257868	0.279443122892886	0.827594446624075	0.291325858835734	0.424370575392245	0.767382103990327	0.719138786481519	0.859409486059186	0.847054910945237	0.855171760754178	0.449345243481521	0.892471373013297	0.591341401512115
88	0.880634314936741	0.677005727028533	0.690046261751977	0.26792383206408	0.186801892166332	0.216695799565655	0.864884604526725	0.483719529033716	0.393884265531256	0.275461254612546	0.859964523974207	0.664209391673181	0.269253380364492	0.320912423244846	0.457070317323126	0.0222750411190231	0.960593173533635	0.573399871460436	0.31585401459854	0.38874921433061	0.2559650997151	0.207736032164148	0.32608954371266	0.297374806971101	0.987589932621177	0.776288875093335	0.403316073016371	0.864035351862447	0.931635962805316	0.974954901571038	0.843473738949558	0.362493914492014	0.248248361006601	0.2579605291063	0.349109286871056	0.870451784280213	0.700740447614497	0.277718070268513	0.859488093565892	0.308586362366835	0.542769531804234	0.772929262394196	0.847688662707308	0.830390522949417	0.946345429014855	0.92680413203546	0.599092519099758	0.886873277447854	0.553019460569352
88.3333333333333	0.922521620818542	0.301707972226446	0.56946724369497	0.275851099701614	0.319426901453798	0.350919010540812	0.880323330061356	0.439602005037699	0.656318947164699	0.220848708487085	0.910383988933265	0.678898907282185	0.407045629267852	0.17713805421307	0.589517224348685	0.0160620421390678	0.939439964652601	0.439983365468224	0.580029197080292	0.488540450749754	0.179086538461538	0.278160959378899	0.296241639492538	0.216948725221392	0.9473540952069	0.811723106059522	0.353418065798421	0.837385949591978	0.878176983834389	0.779773401490405	1	0.325755042906497	0.147070088088855	0.268322093157126	0.418607248562015	1	0.741342007010364	0.282117981277703	0.828621294829755	0.316741810637194	0.506472659815297	0.757451632406288	0.798694261763862	0.761587315886672	0.819717685315202	0.94622378849193	0.579107255969078	0.901271108225604	0.548329879358973
88.6666666666667	0.872780445083903	0.471187471491561	0.252051932547381	0.198786097379421	0.296480669688189	0.338948037501987	0.876518685234922	0.520657076628256	0.255854461002516	0.393634686346864	0.876508846694482	0.654371269307256	0.41428119205897	0.258154140692489	0.413327262625015	0.0441645151371692	0.888849000331382	0.656685947601225	0.485255474452554	0.426567971626111	0.0839120370370373	0.224078053514488	0.256325423083331	0.412026094355677	0.988185062246407	0.78446512506115	0.325173910769392	0.799911168659098	0.857106947749438	0.884109226332232	0.798046530556874	0.310173209687542	0.239754883186518	0.255379227184866	0.383034567487575	0.950703210262957	0.787108844029849	0.36829531258022	0.815262580908696	0.323329210389818	0.485107482365099	0.756136638452237	0.85772340448137	0.797937029863519	0.937757741482522	1	0.653786987602932	0.902095387220175	0.510467832239893
89	0.914792862393069	0.550250874258781	0.36912401134159	0.201515469623805	0.233276370210763	0.118491445521479	0.840676289215166	0.547602908810953	0.28128507838204	0.360747232472325	1	0.582267496939021	0.422918645140868	0.157362657887978	0.459394678355352	0.0263796225346888	0.711421628189551	0.587955086764206	0.221605839416058	0.591171320822483	0.265981125356125	0.178566477193955	0.29087425320734	0.18275503450884	0.939135308948397	0.926242100535261	0.386526491971337	0.807578517871661	0.946006636055904	0.949073466372136	0.752381921363811	0.339322059746491	0.234145132583865	0.240297395066441	0.401574803149606	0.919650762926508	0.792209776868371	0.392452894768367	0.859949852350207	0.250013964808682	0.424891522329776	0.62843107617896	0.659567799581399	0.735011936399261	0.905912349419851	0.980125975258583	0.60430213167522	0.804496298700885	0.423792158524065
89.3333333333333	0.914695901036861	0.424104201510314	0.473586031935532	0.200707473644698	0.257919112365951	0.28698553948832	0.860761395157301	0.542121691394907	0.232088252370815	0.575830258302583	0.81607130904304	0.677828957738586	0.514358069913625	0.384067614578226	0.336482899123349	0.0371071730122551	0.665608085717442	0.530187894597558	0.280642335766423	0.488467495734938	0.281428062678063	0.162189796201303	0.221038726108585	0.165138192934354	0.980173879345542	0.983352834652652	0.196087661488572	0.9165023035924	0.832504757329639	0.898278196362873	0.883246286373194	0.342172716981353	0.194651587176426	0.274557209770167	0.416457251354219	0.933282540205506	0.837432900453792	0.511113583078055	0.822812175578127	0.333862666081475	0.482227450515335	0.814555622732769	0.856894701613845	0.682221521553083	0.918276550144114	0.919007935663213	0.637563504272399	0.912187235450999	0.566081590125831
89.6666666666667	0.936584145254368	0.486696062034362	0.590135800626772	0.209264596415552	0.260519602744137	0.532814238042269	0.881618307878386	0.438882333743379	0.28832978517515	0.406642066420664	0.974854414422455	0.662418181499745	0.314339981006648	0.290187014078588	0.328782874428942	0.0666591830858058	0.759306307301447	0.510793542777211	0.0790072992700727	0.650820463320463	0.236155626780626	0.218418133924858	0.291838240544593	0.200718540228798	0.977954830122786	0.938987094799299	0.29781892358387	0.818226986660243	0.786359590813792	0.903326220095335	0.910963395057541	0.330863936839759	0.271047829319395	0.318536292741452	0.253057463561736	0.951326112472458	0.840239941703625	0.60860643814283	0.866521035050075	0.179966484459163	0.447309182007425	0.784235187424426	0.84636592543799	0.687592901220665	0.838770231320671	0.921685698996793	0.624468373902814	0.804397639825088	0.582579565448043
90	0.93714714667751	0.368303684557296	0.441874347112371	0.206961489766445	0.358496173564158	0.138778536998781	0.865754829619769	0.610348203750659	0.172092123088833	0.512638376383764	0.875047412927553	0.729259776425127	0.147831592276037	0.281361630594663	0.332462341029757	0.0519490660979145	0.798878824698995	0.623719330082039	0.436788321167883	0.547364640387897	0.141648860398861	0.238260779148759	0.281365291695428	0.476095931423529	0.970252745554405	0.877805400673439	0.49134368952351	0.919750669999096	0.803837889570369	0.934694474551735	0.590741368785186	0.390460856252969	0.28375425237119	0.241981906648973	0.356369017702574	0.787945555258118	0.924151975947919	0.505950404737049	0.798251774784419	0.00672704783944429	0.436197765010578	0.773851269649335	0.705821106424573	0.777622629611278	0.829162663513414	0.925568015408884	0.637615212585804	0.727838352205822	0.548356595182755
90.3333333333333	0.968256103091817	0.644721504231919	0.497910759588121	0.16260441916541	0.245808257176115	0.425181418507336	0.922834861838817	0.48440572724458	0.355099670988968	0.588745387453875	0.942563421763092	0.595407814771354	0.263464930131596	0.166304779248675	0.426352018767749	0.0521930959085962	0.854661438197283	0.648066235681071	0.34843795620438	0.576372676663374	0.265046296296297	0.237508664910578	0.33937114702592	0.334467870536699	1	1	0.428683508551703	0.761303411725737	0.640438977704788	0.926578632533125	0.762888602500622	0.351680773314094	0.291571856624688	0.247138451097659	0.175936784497682	0.803703436772851	0.764890589736041	0.557719097085551	0.830671762158706	0.130403383473646	0.459221078444868	0.738799879081016	0.616576182229636	0.750146389802261	0.903695218387407	0.893451738233953	0.553757255322724	0.815278759062295	0.641015659289283
90.6666666666667	0.832428881973007	0.462115452840708	0.379570213400985	0.154187264201961	0.321432994031255	0.506859473489062	0.952919786484058	0.422472154578699	0.0912715308689759	0.465590405904059	0.850415002565876	0.518212228950096	0.372495816940261	0.207116340967991	0.470616742807754	0.0435349182256104	0.653899259913841	0.762882310687687	0.588379562043795	0.529720750650983	0.341568732193732	0.24495009011507	0.148596862875776	0.433897450442785	0.948512060601727	0.809277097059354	0.347089282912287	0.866632539371857	0.759197193641005	0.973353485424113	0.788319880621312	0.436470229401655	0.207177777277131	0.248623002672193	0.185793265203552	0.889313880938163	0.794502059837433	0.446935806821488	0.936211091575162	0.113142879942545	0.253057386752277	0.784749093107618	0.862451260584554	0.861751722895365	0.830485551696105	0.892956263932921	0.559121992838399	0.899437962662389	0.670940244335291
91	0.856106219601833	0.511732806243981	0.669004626175197	0.199651352916102	0.234378482799614	0.310980454473223	0.879867497869761	0.542121691394907	0.144145538997484	0.567481549815498	0.929393783886298	0.570408889497458	0.276579387690499	0.27862996427821	0.368176626744042	0	0.62763724732133	0.612604438395524	0.469547445255474	0.572180569273592	0.113915598290598	0.247764453070844	0.337800204698545	0.28480035296713	0.956949983737737	0.910355915765744	0.333594853287306	0.897667048089373	0.75604674285842	0.780362212579555	0.821845395554953	0.463398968836334	0.112555477955257	0.241618342998067	0.335092421957894	0.875131272779688	0.849529720051926	0.532385809388531	0.951525014894142	0.229689183258189	0.318830114121262	0.870072551390569	0.842748318689374	0.826933471465249	0.684435740152243	0.820705100302349	0.700027146864537	0.856308121216751	0.650771705652687
91.3333333333333	0.918621272070438	0.413055597790279	0.474257573496492	0.105427569840755	0.226106446739481	0.527782191853381	0.914158510464716	0.681043356011347	0.313799109734856	0.183487084870849	0.974698230661104	0.566003308564214	0.294984850540406	0.198431042936191	0.442892641066798	0.00767229724783181	0.997376560256269	0.564931382556425	0.602861313868613	0.423240100565682	0.176504629629629	0.264019825315403	0.265120319900983	0.192808294727553	0.883047801826448	0.929019965727266	0.142476070924212	0.9579443825469	0.812298674650788	0.678497894156519	0.746279590314047	0.332207147759067	0.26832180593417	0.25070137487654	0.183028983079243	0.778787348392809	0.830552834307353	0.528935704139784	0.912051097000021	0.265363284523002	0.294212194817213	0.853007859733978	0.884231271846414	0.855941173820998	0.699652649471584	0.83417466093042	0.642811898082914	0.962630563883213	0.592944350939061
91.6666666666667	0.821700577076459	0.454563884243069	0.450007461572899	0.168883883979412	0.29068529113109	0.292441336935218	0.844512013509209	0.426723236177709	0.469247145345462	0.158809963099631	0.973688614203797	0.587021766786028	0.307059195948085	0.374191590203357	0.400416718113347	0.0201959071320153	0.808433668397217	0.633851272163623	0.413430656934306	0.636100386100386	0.226139601139601	0.272982808817413	0.288232213838574	0.427783555513536	0.902161150953015	0.97259325588115	0.212511114598044	0.825510403806197	0.85086749114634	0.769452330679308	0.745205634312329	0.380451295406688	0.179331786333837	0.240509473862803	0.294186630926453	0.844264151720445	0.78628844801987	0.58573408861431	0.932416919746	0	0.366320992255679	0.757738814993954	0.668168247930899	0.882944461961172	0.850203237011307	0.83786465991011	0.604327985831922	0.867278351696614	0.582096772346832
92	0.884193735045275	0.394556788809488	0.254588867333234	0.101521195579562	0.393132228744087	0.307431537687378	0.902270614104381	0.622063782960527	0.476485388039482	0.333487084870849	0.986272562975524	0.61761563654833	0.403382625604848	0.302140972659989	0.380154957402148	0.00360188000566149	0.886197945432453	0.79917583456202	0.279007299270073	0.666494567657358	0.338630698005698	0.338960903923472	0.293611501202009	0.302795373609404	0.905450510819595	0.882854764281975	0.126941785658246	0.878395163961577	0.84550688369772	0.878273620888167	0.660186755296299	0.498064368544229	0.15249960574042	0.214290475238286	0.279527559055118	0.873329489529065	0.878846812761501	0.777849845121763	1	0.238036148904761	0.373453306424801	0.842639056831923	0.841733688896444	0.823791721093644	0.809223265094967	0.905147867882328	0.625166436133769	1	0.597811401550281
92.3333333333333	0.790031747024694	0.382038416704678	0.671541560961051	0.0189847244224736	0.290301409218119	0.0799830499496791	0.944727756813526	0.438463920200169	0.381381846332495	0.433717712177122	0.933091992235436	0.630687490347367	0.340026228915118	0.33776937265065	0.16550191381652	0.0283172192315014	0.801502264442726	0.82140561793505	0.193167883211678	0.578898042560833	0.0675302706552705	0.25024954942465	0.28783947825673	0.247738804323847	0.935958977576531	0.798686307213009	0.361002144463623	0.916423258755157	0.932930030945917	0.753010624852329	0.686097356937756	0.432208907424026	0.238943834906617	0.152823980658414	0.323700228960742	0.93854889524947	0.814728843032505	0.616897985727243	0.988339783425443	0.272098312253122	0.390752556557684	0.88412938331318	1	0.851189135624521	0.821483999704382	0.917617671476315	0.602259653295759	0.933853997593997	0.60166611326746
92.6666666666667	0.982374927669956	0.576149206831889	0.469482166840769	0	0.36379622062065	0.183802108162508	0.952298197131883	0.68763755345233	0.316276369266499	0.284824723247233	0.912548249626274	0.648489731191099	0.379957491068602	0.265135065723425	0.23196382269416	0.0427833064087109	0.939660885894179	1	0.530043795620438	0.481211277722906	0.24198717948718	0.205756966588105	0.210851403137124	0.413601840471463	0.903946539828704	0.855127607288249	0.490036089753649	0.935454244331356	0.961073685543304	0.770847475425575	0.884948789255918	0.462841741599066	0.359159213283169	0.150739549059885	0.279527559055118	0.975284681753598	0.842656088383997	0.657205688566392	0.924423326245498	0.265658540477995	0.376974992429328	0.82607315598549	0.791899960689736	0.84357686590694	0.68889956396423	0.902078863359932	0.677818426257482	0.88526290999128	0.564269684791445
[truncated: 142 more columns]
